# Supplementary material for: Fluorescent coumarin-alkynes for labeling of amino acids and peptides via manganese(i)-catalyzed C–H alkenylation
Source: Royal Society of Chemistry journal article supplement (doi:10.1039/d4cc00361f), 2024-01-01
Supplement: d4cc00361f1.pdf [file d4cc00361f1.pdf]

## Supporting Information

### **Fluorescent Coumarin-Alkynes for Labeling of Amino Acids and Peptides *via* Manganese(I)-Catalyzed C–H Alkenylation**

Adelina Kopp, Tsuyoshi Oyama and Lutz Ackermann\*

Institut für Organische und Biomolekulare Chemie and  
Wöhler Research Institute for Sustainable Chemistry

Georg-August-Universität Göttingen

Tammannstraße 2, D-37077 Göttingen (Germany)

E-mail: [Lutz.Ackermann@chemie.uni-goettingen.de](mailto:Lutz.Ackermann@chemie.uni-goettingen.de)

## 1. General Remarks

Catalytic reactions were performed under a N<sub>2</sub> atmosphere using pre-dried glassware and standard Schlenk techniques. 1,4-dioxane was dried over CaH<sub>2</sub> and freshly distilled under N<sub>2</sub>. Unless stated otherwise, peptides were synthesized under standard solution phase protocols (EDCI/HOBt) according to previously described methods. Other chemicals were obtained from commercial sources and were used without further purification. Yields refer to isolated compounds, estimated to be >95% pure as determined by <sup>1</sup>H NMR. **Flash chromatography:** Merck silica gel 60 (40–63 μm). **NMR:** All spectra were recorded at 295 K on a Varian Mercury Vx 300, Varian VNMRs 300, Bruker Avance III HD 400 and Bruker Avance III 400 instrument in the solvent indicated; chemical shifts (δ) are provided in ppm. **IR:** All spectra were recorded on a Bruker FT-IR Alpha device. **MS:** HPLC-MS analysis was recorded on HPLC Agilent 1200 System comprising a Kinetex C18 column (5 μm, 100 Å, 150 x 4.6 mm) and a MS detector configured with an electrospray ionization source (6110 quadrupole LC/MS). ESI-MS was recorded on Bruker Daltonic *micrOTOF*. High resolution mass spectrometry (HR-MS) was recorded on *micrOTOF*, Bruker Daltonic. MALDI analysis was recorded on Bruker UltrafleXtreme MALDI TOF-TOF. **Melting points (Mp.):** All compounds were measured on Stuart<sup>TM</sup> melting point apparatus SMP3, and the values are uncorrected. **Spectroscopic measurements:** Spectral properties were recorded in a 10 mm quartz cuvette on a JASCO V-770 spectrophotometer. All compounds were measured at room temperature dissolved in a 10 mM solution in MeOH. All *E/Z* ratios are determined by <sup>1</sup>H NMR given by *major E* and *minor Z*.

### General Procedure of Manganese-Catalyzed C–H Alkenylation of Amino Acids and Peptides (GP1)

A dry flask was preloaded with the corresponding amino acid or peptide (0.10 mmol, 1.0 equiv.) and alkyne (0.11 mmol, 1.1 equiv.), the catalyst MnBr(CO)<sub>5</sub> (2.0 mg, 7.5 mol %) was added and pre-dissolved in a 1,4-dioxane stock solution (2.0 mg/ 1 mL) and added to the solid ingredients. The solution was stirred at 90 °C for 20 h under N<sub>2</sub> atmosphere. After cooling to ambient temperature, the mixture was dissolved in CH<sub>2</sub>Cl<sub>2</sub> (3 mL), concentrated in vacuo, and purified by *flash*-column chromatography on silica gel to obtain the desired product.

### General Procedures of Alkyne Synthesis (GP2)

Regarding to Taran<sup>[1]</sup> or Liu<sup>[2]</sup> the corresponding hydroxy-coumarin or hydroxy-chromone (5.0 – 7.5 mmol, 1.0 equiv.) was dissolved in dry CH<sub>2</sub>Cl<sub>2</sub> (0.2 M), dry triethylamine (5.0 equiv.) was added at 0 °C, followed by a drop-wise addition of triflic anhydride (1.2 equiv.). After 3 h at 0 °C the reaction mixture was filtered over celite, and the filtrate was concentrated by reduced pressure. The crude product was redissolved in dry MeCN (0.2 M) at room temperature, DIPEA (1.2 equiv.), CuI (10 mol%), tetrakis(triphenylphosphine) palladium (5 mol%) and trimethylsilylacetylene

(1.1 equiv.) was added. After 12 h of stirring excess solvent was removed and the crude was dissolved in dry THF (0.2 M) followed by the addition of KF (1.2 equiv.) and were stirred for 1 h at ambient temperature. The crude was product *flash*-column chromatography on silica gel (*n*-hexane/EtOAc, 10:1 to 1:1) to obtain the corresponding desired alkyne.

### General Procedures of 3-Methoxypropyne-alkyne Synthesis (GP3)

Regarding to Nilsson<sup>[3]</sup> or Krupadanam<sup>[4]</sup>, the corresponding 3-methoxypropyne-alkyne were obtained by adding K<sub>2</sub>CO<sub>3</sub> (3.0 equiv.) and propargyl bromide (1.5 equiv., 80 wt% in PhMe) to a solution of hydroxyl coumarin or chromone (3–6 mmol, 1.0 equiv.) in dry acetone (0.05 M). The reaction mixture was heated to 60 °C for 16 h. After cooling to room temperature, volatiles were removed under reduced pressure. The residue was extracted in EtOAc by water (1 x 100 mL), brine (2 x 80 mL), and the combined organic layers were dried over Na<sub>2</sub>SO<sub>4</sub>. The solvent was removed under reduced pressure and the crude was purified by *flash*-column chromatography (*n*-hexane/EtOAc).

### Optimization Studies

**Table S-1** Optimization of the manganese catalyzed alkenylation with coumarin 2.

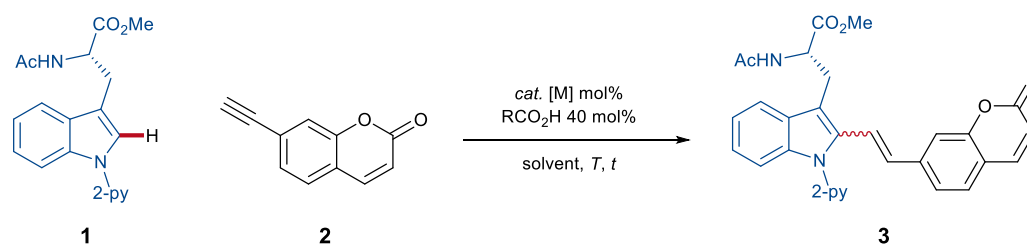

| Entry | Catalyst Loading (mol%) | Catalyst              | RCO <sub>2</sub> H     | Solvent          | Temperature (°C) | Time (h) | Yield (%) <sup>[a]</sup> , <i>E/Z</i> <sup>[b]</sup> |
|-------|-------------------------|-----------------------|------------------------|------------------|------------------|----------|------------------------------------------------------|
| 1     | 20                      | MnBr(CO) <sub>5</sub> | 1-Ad-CO <sub>2</sub> H | 1,4-dioxane      | 120              | 24       | 92, 9/1 <sup>[a]</sup>                               |
| 2     | 15                      | MnBr(CO) <sub>5</sub> | 1-Ad-CO <sub>2</sub> H | 1,4-dioxane      | 120              | 24       | 92, 9/1 <sup>[a]</sup>                               |
| 3     | 10                      | MnBr(CO) <sub>5</sub> | 1-Ad-CO <sub>2</sub> H | 1,4-dioxane      | 120              | 24       | 91, 9/1 <sup>[a]</sup>                               |
| 4     | 7.5                     | MnBr(CO) <sub>5</sub> | 1-Ad-CO <sub>2</sub> H | 1,4-dioxane      | 120              | 24       | 91, 9/1 <sup>[a]</sup>                               |
| 5     | 5                       | MnBr(CO) <sub>5</sub> | 1-Ad-CO <sub>2</sub> H | 1,4-dioxane      | 120              | 24       | 82, 8/2 <sup>[a]</sup>                               |
| 6     | 2.5                     | MnBr(CO) <sub>5</sub> | 1-Ad-CO <sub>2</sub> H | 1,4-dioxane      | 120              | 24       | 68, 8/2 <sup>[a]</sup>                               |
| 7     | 0                       | MnBr(CO) <sub>5</sub> | 1-Ad-CO <sub>2</sub> H | 1,4-dioxane      | 120              | 24       | -, -                                                 |
| 8     | 7.5                     | MnBr(CO) <sub>5</sub> | 1-Ad-CO <sub>2</sub> H | <i>m</i> -xylene | 120              | 24       | 15, 8/2                                              |
| 9     | 7.5                     | MnBr(CO) <sub>5</sub> | 1-Ad-CO <sub>2</sub> H | DCE              | 120              | 24       | 69, 8/2 <sup>[a]</sup>                               |
| 10    | 7.5                     | MnBr(CO) <sub>5</sub> | 1-Ad-CO <sub>2</sub> H | DMF              | 120              | 24       | traces, -                                            |
| 11    | 7.5                     | MnBr(CO) <sub>5</sub> | 1-Ad-CO <sub>2</sub> H | DMSO             | 120              | 24       | -, -                                                 |
| 12    | 7.5                     | MnBr(CO) <sub>5</sub> | 1-Ad-CO <sub>2</sub> H | PhMe             | 120              | 24       | -, -                                                 |
| 13    | 7.5                     | MnBr(CO) <sub>5</sub> | 1-Ad-CO <sub>2</sub> H | 1,4-dioxane      | 100              | 24       | 91, 9/1 <sup>[a]</sup>                               |

|           |            |                                                      |                             |                    |           |           |                         |
|-----------|------------|------------------------------------------------------|-----------------------------|--------------------|-----------|-----------|-------------------------|
| 14        | 7.5        | MnBr(CO) <sub>5</sub>                                | 1-Ad-CO <sub>2</sub> H      | 1,4-dioxane        | 90        | 24        | 89, >9/1 <sup>[a]</sup> |
| 15        | 7.5        | MnBr(CO) <sub>5</sub>                                | 1-Ad-CO <sub>2</sub> H      | 1,4-dioxane        | 80        | 24        | 74, 8/2 <sup>[a]</sup>  |
| 16        | 7.5        | MnBr(CO) <sub>5</sub>                                | 1-Ad-CO <sub>2</sub> H      | 1,4-dioxane        | 60        | 24        | 55, 8/2 <sup>[a]</sup>  |
| <b>17</b> | <b>7.5</b> | <b>MnBr(CO)<sub>5</sub></b>                          | <b>1-Ad-CO<sub>2</sub>H</b> | <b>1,4-dioxane</b> | <b>90</b> | <b>20</b> | 90, >9/1 <sup>[a]</sup> |
| 18        | 7.5        | MnBr(CO) <sub>5</sub>                                | 1-Ad-CO <sub>2</sub> H      | 1,4-dioxane        | 55        | 71        | 79, 8/2 <sup>[a]</sup>  |
| 19        | 7.5        | MnBr(CO) <sub>5</sub>                                | 1-Ad-CO <sub>2</sub> H      | 1,4-dioxane        | 90        | 16        | 66, 8/2 <sup>[a]</sup>  |
| 20        | 7.5        | MnBr(CO) <sub>5</sub>                                | 1-Ad-CO <sub>2</sub> H      | 1,4-dioxane        | 90        | 12        | 53, 8/2                 |
| 21        | 7.5        | Pd(OAc) <sub>2</sub>                                 | 1-Ad-CO <sub>2</sub> H      | 1,4-dioxane        | 90        | 24        | -, -                    |
| 22        | 7.5        | [RuCl <sub>2</sub> ( <i>p</i> -cymene)] <sub>2</sub> | 1-Ad-CO <sub>2</sub> H      | 1,4-dioxane        | 90        | 24        | -, -                    |
| 23        | 7.5        | Co(OAc) <sub>2</sub>                                 | 1-Ad-CO <sub>2</sub> H      | 1,4-dioxane        | 90        | 24        | -, -                    |
| 24        | 7.5        | MnBr(CO) <sub>5</sub>                                | NaOAc                       | 1,4-dioxane        | 90        | 24        | 42, 8/2                 |
| 25        | 7.5        | MnBr(CO) <sub>5</sub>                                | KOAc                        | 1,4-dioxane        | 90        | 24        | 33, 8/2                 |

Reaction conditions: 0.10 mmol of **1**, 0.12 mmol of **2**, 40 mol% of acid and 1.0 mL of solvent were used. [a]

Isolated yields. [b] Determined by <sup>1</sup>H NMR spectroscopy.

## Characterization Data

### 7-Ethynyl-2*H*-chromen-2-one (**2**)

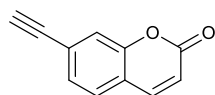

Following **GP2** and starting from 7-hydroxy-2*H*-chromen-2-one (1.0 g, 6.2 mmol) the crude was purified by a final *flash*-column chromatography (*n*-hexane/EtOAc, 2:1 to 0:1) to give the desired product **2** (0.81 g, 77%) over three steps as a yellow solid. **Mp.**: 109 °C. **<sup>1</sup>H NMR** (300 MHz, CDCl<sub>3</sub>) δ 7.68 (d, *J* = 9.6 Hz, 1H), 7.44 (d, *J* = 8.0 Hz, 1H), 7.42 (d, *J* = 1.2 Hz, 1H), 7.39 (dd, *J* = 8.0, 1.2 Hz, 1H), 6.44 (d, *J* = 9.6 Hz, 1H), 3.27 (s, 1H). **<sup>13</sup>C NMR** (100 MHz, CDCl<sub>3</sub>) δ 160.9, 154.0, 133.7, 128.0, 127.7, 125.6, 120.2, 119.1, 117.2, 82.0, 80.6. **IR (ATR)**: 3109, 3052, 1997, 1667, 1112, 777, 689, 618, **MS (ESI) *m/z* (relative intensity)**: 192.9 (100) [M+Na]<sup>+</sup>, **HRMS (ESI) *m/z***: Calcd. for C<sub>11</sub>H<sub>6</sub>O<sub>2</sub> [M+Na]<sup>+</sup> 193.0265; found 193.0261. The data are consistent with the literature.<sup>[1]</sup>

### 7-Ethynyl-3-(4-methoxyphenyl)-4*H*-chromen-4-one (**2a**)

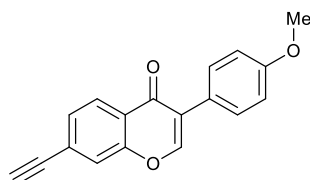

Following **GP2** and starting from 7-hydroxy-3-(4-methoxyphenyl)-4*H*-chromen-4-one **2a** (1.5 g, 5.6 mmol) the crude was purified by a final *flash*-column chromatography (*n*-hexane/EtOAc, 2:1 to 0:1) to give the desired product **2a** (1.31 g, 85%) over three steps as an orange solid. **Mp.**: = 186 °C. **<sup>1</sup>H NMR** (300 MHz, CDCl<sub>3</sub>) δ 8.25 (d, *J* = 8.4 Hz, 1H), 7.99 (s, 1H), 7.79 – 7.63 (m, 1H), 7.60 (s,

1H), 7.50 – 7.48 (m, 3H), 6.97 (d,  $J = 8.4$  Hz, 2H), 3.84 (s, 3H), 3.31 (s, 1H).  $^{13}\text{C NMR}$  (75 MHz,  $\text{CDCl}_3$ )  $\delta$  175.8, 159.9, 155.8, 152.7, 132.7, 132.1, 130.0, 128.7, 127.5, 126.6, 125.4, 124.5, 123.9, 121.6, 114.0, 81.9, 81.0, 55.3. **IR (ATR):** 3259, 1641, 1509, 1429, 1244, 1176, 1110, 881, 696  $\text{cm}^{-1}$ . **MS (ESI-TOF)  $m/z$  (relative intensity):** 277.1 (100)  $[\text{M}+\text{H}]^+$ . **HRMS (ESI-TOF)  $m/z$ :**  $[\text{M}+\text{H}]^+$  Calcd. for  $\text{C}_{18}\text{H}_{13}\text{O}_3$  277.0859; found 277.0854. The data are consistent with the literature.<sup>[2]</sup>

### 7-(Prop-2-yn-1-yloxy)-2H-chromen-2-one (11)

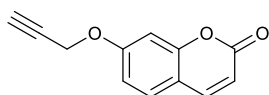

The reaction was performed regarding to **GP3**, starting from the corresponding alcohol (0.5 g, 2.8 mmol) the crude was purified by *flash*-column chromatography (*n*-heptane/EtOAc 4:1 to 1:1) yielding the desired product **11** (0.49 g, 88%) as a beige solid. **Mp.:** = 106 °C.  $^1\text{H NMR}$  (300 MHz,  $\text{CDCl}_3$ )  $\delta$  7.64 (d,  $J = 9.6$  Hz, 1H), 7.40 (d,  $J = 8.4$  Hz, 1H), 6.93 (d,  $J = 2.4$  Hz, 1H), 6.90 (dd,  $J = 2.4, 8.4$  Hz, 1H), 6.27 (d,  $J = 9.6$  Hz, 1H), 4.76 (s, 2H), 2.57 (t,  $J = 2.4$  Hz, 1H).  $^{13}\text{C NMR}$  (75 MHz,  $\text{CDCl}_3$ )  $\delta$  161.1, 160.7, 155.8, 143.4, 129.0, 113.8, 113.3, 113.2, 102.3, 77.5, 76.7, 56.3. **IR (ATR):** 3259, 1642, 1519, 1428, 1284, 1276, 1210, 880, 697  $\text{cm}^{-1}$ . **MS (ESI-TOF)  $m/z$  (relative intensity):** 201.1 (100)  $[\text{M}+\text{H}]^+$ . **HR-MS (ESI-TOF)  $m/z$ :**  $[\text{M}+\text{H}]^+$  Calcd. for  $\text{C}_{12}\text{H}_9\text{O}_3$  201.0552; found: 201.0553. The data are consistent with the literature.<sup>[3]</sup>

### 4-Methyl-7-(prop-2-yn-1-yloxy)-2H-chromen-2-one (11a)

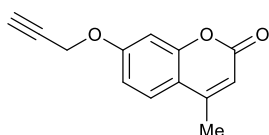

The reaction was performed regarding to **GP3**, starting from the corresponding alcohol (0.5 g, 2.8 mmol) the crude was purified by *flash*-column chromatography (*n*-heptane/EtOAc 4:1 to 1:1) yielding the desired product **11a** (0.47 g, 79%) as a beige solid. **Mp.:** = 111 °C.  $^1\text{H NMR}$  (300 MHz,  $\text{CDCl}_3$ )  $\delta$  7.51 (d,  $J = 9.2$  Hz, 1H), 7.29 (s, 1H), 6.95 (d,  $J = 7.9$  Hz, 2H), 4.79 (s, 2H), 2.60 (s, 1H), 2.43 (s, 3H).  $^{13}\text{C NMR}$  (75 MHz,  $\text{CDCl}_3$ )  $\delta$  161.2, 160.5, 155.2, 152.5, 125.7, 114.4, 112.8, 112.5, 102.3, 77.5, 76.6, 56.3, 18.8. **IR (ATR):** 3258, 1642, 1512, 1433, 1274, 1196, 1101, 883, 696  $\text{cm}^{-1}$ . **MS (ESI-TOF)  $m/z$  (relative intensity):** 215.1 (100)  $[\text{M}+\text{H}]^+$ . **HR-MS (ESI-TOF)  $m/z$ :**  $[\text{M}+\text{H}]^+$  Calcd. for  $\text{C}_{13}\text{H}_{11}\text{O}_3$  215.0708; found 215.0704. The data are consistent with the literature.<sup>[3]</sup>

### 3-(4-Methoxyphenyl)-7-(prop-2-yn-1-yloxy)-4H-chromen-4-one (11b)

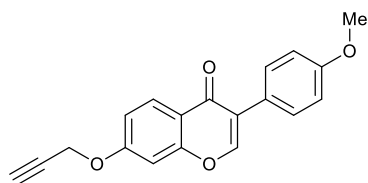

The reaction was performed regarding to GP3, starting from the corresponding alcohol (0.5 g, 1.9 mmol) to crude was purified by *flash*-column chromatography (*n*-heptane/EtOAc 4:1 to 1:1) yielding the desired product **11b** (0.46 g, 79%) as a beige solid. **Mp.**: = 146–147 °C. **<sup>1</sup>H NMR** (300 MHz, CDCl<sub>3</sub>) δ 8.21 (d, *J* = 9.5 Hz, 1H), 7.93 (s, 1H), 7.71 (d, *J* = 9.5 Hz, 1H), 7.53 (d, *J* = 9.0 Hz, 1H), 7.43 (d, *J* = 7.51 Hz, 1H), 7.28 (s, 1H), 7.07 (d, *J* = 8.8 Hz, 1H), 6.95 (d, *J* = 2 Hz, 1H), 4.83 (s, 1H), 4.80 (s, 2H), 3.94 (s, 3H). **<sup>13</sup>C NMR** (75 MHz, CDCl<sub>3</sub>) δ 161.0, 160.6, 155.5, 152.2, 143.3, 130.1, 128.8, 128.0, 114.8, 114.0, 113.7, 113.2, 113.1, 102.2, 101.6, 56.2, 55.4. **IR (ATR)**: 3279, 1671, 1529, 1439, 1245, 1076, 1010, 899, 697 cm<sup>-1</sup>. **MS (ESI-TOF) *m/z* (relative intensity)**: 307.1 (100) [M+H]<sup>+</sup>. **HRMS (ESI-TOF) *m/z***: [M+H]<sup>+</sup> Calcd. for C<sub>19</sub>H<sub>15</sub>O<sub>4</sub> 307.0965; found: 307.0960. The data are consistent with the literature.<sup>[4]</sup>

### Methyl (S)-2-acetamido-3-{2-[2-(2-oxo-2H-chromen-7-yl)vinyl]-1-(pyridin-2-yl)-1H-indol-3-yl}propanoate (3)

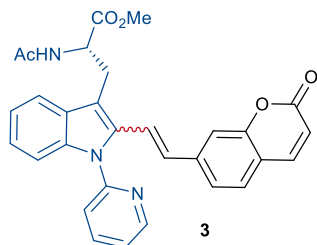

Following the general procedure **GP1** the corresponding tryptophane (33.4 mg, 0.10 mmol, 1.0 equiv.) and alkyne (18.7 mg, 0.11 mmol, 1.1 equiv.) were used. Purification by *flash*-column chromatography on silica gel (DCM/MeOH 10:0.1) yielded **3** (46.7 mg, 92%, *E/Z* = >9:1) as a bright yellow solid. **Mp.**: = 113°C. **<sup>1</sup>H NMR** (300 MHz, CDCl<sub>3</sub>) δ 8.75 (d, *J* = 7.0 Hz, 0.9H, *major*), 8.38 (d, *J* = 5.0 Hz, 0.06H, *minor*), 7.92 (*t*, *J* = 7.9 Hz, 1H), 7.66 (d, *J* = 9.6 Hz, 1H), 7.57 (d, *J* = 4.8 Hz, 1H), 7.48 – 7.32 (m, 5H), 7.32 – 7.06 (m, 4H), 6.97 – 6.87 (m, 0.06H, *minor*), 6.77 (d, *J* = 12.0 Hz, 0.06H, *minor*), 6.61 (d, *J* = 12.2 Hz, 0.09H, *minor*), 6.45 (d, *J* = 16.7 Hz, 0.98H, *major*), 6.37 (d, *J* = 9.5 Hz, 1H), 6.20 (d, *J* = 7.7 Hz, 1H), 5.00 (td, *J* = 7.2, 5.0 Hz, 1H), 3.67 – 3.56 (m, 2H), 3.55 (s, 3H), 1.90 (s, 3H). **<sup>13</sup>C NMR** (75 MHz, CDCl<sub>3</sub>) δ 172.4, 169.8, 160.9, 154.6, 152.0, 150.0, 143.1, 141.3, 138.7, 138.6, 134.2, 129.7, 129.0, 128.3, 124.5, 122.8, 122.5, 122.3, 121.5, 120.0, 119.0, 118.3, 116.1, 114.4, 114.1, 111.0, 53.1, 52.7, 27.9, 23.3. **IR (ATR)**: 1728, 1656, 1605, 1586, 1468, 1435, 1350, 1127,

907, 723, 646  $\text{cm}^{-1}$ . **MS (ESI-TOF)  $m/z$  (relative intensity):** 530.2 (100)  $[\text{M}+\text{Na}]^+$ . **HR-MS (ESI-TOF)  $m/z$ :**  $[\text{M}+\text{Na}]^+$  Calcd. for  $\text{C}_{30}\text{H}_{25}\text{N}_3\text{O}_5$  530.1686; found 530.1685.

**Methyl (S)-2-[(tert-butoxycarbonyl)amino]-3-{2-[2-(2-oxo-2H-chromen-7-yl)vinyl]-1-(pyridin-2-yl)-1H-indol-3-yl}propanoate (4)**

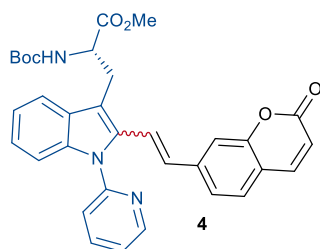

Following the general procedure **GP1** the corresponding tryptophane (39.5 mg, 0.10 mmol, 1.0 equiv.) and alkyne (18.7 mg, 0.11 mmol, 1.1 equiv.) were used. Purification by *flash*-column chromatography on silica gel (DCM/MeOH 10:0.1) yielded **4** (50.3 mg, 89%,  $E/Z = 8:2$ ) as a bright yellow solid. **Mp.:** = 120°C.  **$^1\text{H NMR}$**  (300 MHz,  $\text{CDCl}_3$ )  $\delta$  8.75 (d,  $J = 4.9$  Hz, 0.8H, *major*), 8.39 (d,  $J = 4.9$  Hz, 0.2 H, *minor*), 7.91 (td,  $J = 7.8$  Hz, 2.0, 1H), 7.71–7.55 (m, 3H), 7.50 – 7.31 (m, 4H), 7.28 – 7.15 (m, 4H), 6.79 (d,  $J = 12.0$  Hz, 0.2 H, *minor*), 6.63 (d,  $J = 12.0$  Hz, 0.2 H, *minor*), 6.50 (d,  $J = 16.6$  Hz, 1H, *major*), 6.37 (d,  $J = 9.5$  Hz, 1H), 5.26 (d,  $J = 8.4$  Hz, 0.8 H, *major*), 5.15 (d,  $J = 8.1$  Hz, 0.2 H, *minor*), 4.75 (q,  $J = 6.9$  Hz, 0.8 H, *major*), 4.64 (q,  $J = 6.7$  Hz, 0.2 H, *minor*), 3.74 – 3.27 (m, 5H), 1.38 (s, 9H).  **$^{13}\text{C NMR}$**  (75 MHz,  $\text{CDCl}_3$ )  $\delta$  172.7, 172.6 (*minor*), 160.9, 160.9 (*minor*), 155.1, 154.6, 153.9 (*minor*), 152.0, 151.0 (*minor*), 149.9, 148.9 (*minor*), 143.1 (*minor*), 141.4, 138.6, 138.5 (*minor*), 137.5, 137.4 (*minor*), 134.0, 129.8, 129.1, 128.1, 127.7, 124.6 (*minor*), 124.4, 124.0 (*minor*), 122.7, 122.6, 122.3, 121.8 (*minor*), 121.5, 121.3 (*minor*), 120.7 (*minor*), 120.2, 119.3, 118.2, 117.9 (*minor*), 116.4, 116.0, 114.7, 114.1, 111.3 (*minor*), 111.0, 80.1, 54.4, 54.1 (*minor*), 52.6, 52.5 (*minor*), 28.9 (*minor*), 28.4. **IR (ATR):** 1729, 1606, 1453, 1366, 1167, 1101, 907, 722, 646  $\text{cm}^{-1}$ . **MS (ESI-TOF)  $m/z$  (relative intensity):** 566.2 (10)  $[\text{M}+\text{H}]^+$ , 588.2 (100)  $[\text{M}+\text{Na}]^+$ . **HR-MS (ESI-TOF)  $m/z$ :**  $[\text{M}+\text{Na}]^+$  Calcd. for  $\text{C}_{33}\text{H}_{31}\text{N}_3\text{O}_6$  588.2105; found 588.2105.

**Methyl (S)-2-[(tert-butoxycarbonyl)amino]-3-{2-[2-(2-oxo-2H-chromen-7-yl)vinyl]-1-(pyrimidin-2-yl)-1H-indol-3-yl}propanoate (5)**

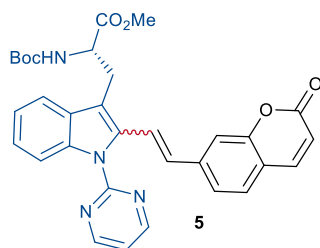

Following the general procedure **GP1** the corresponding tryptophane (39.7 mg, 0.10 mmol, 1.0 equiv.) and alkyne (18.7 mg, 0.11 mmol, 1.1 equiv.) were used. Purification by *flash*-column chromatography on silica gel (DCM/MeOH 10:0.1) yielded **5** (46.5 mg, 82%,  $E/Z = 8:2$ ) as a bright

yellow solid. **Mp.**: = 119.8°C. **<sup>1</sup>H NMR** (300 MHz, CDCl<sub>3</sub>) δ 8.82 (d, *J* = 4.8 Hz, 1.56H, major), 8.63 (d, *J* = 4.8 Hz, 0.44H, minor), 8.23 (d, *J* = 8.1 Hz, 1H), 7.66 (d, *J* = 9.5 Hz, 1H), 7.61 – 7.48 (m, 2H), 7.42 (s, 2H), 7.34 – 7.27 (m, 1H), 7.24 – 7.11 (m, 2H), 7.07 – 6.90 (m, 1H), 6.82 (d, *J* = 16.5 Hz, 0.67H, major), 6.64 (d, *J* = 12.0 Hz, 0.23H, minor), 6.36 (d, *J* = 9.5 Hz, 0.78H, major), 6.31 (d, *J* = 9.5 Hz, 0.21H, minor), 5.23 (d, *J* = 8.3 Hz, 1H), 4.71 (q, *J* = 7.3 Hz, 1H), 3.52 (s, 3H), 3.45 (d, *J* = 7.5 Hz, 2H), 1.38 (s, 9H). **<sup>13</sup>C NMR** (75 MHz, CDCl<sub>3</sub>) δ 172.9, 172.6 (*minor*), 161.0, 160.9 (*minor*), 158.5, 158.2 (*minor*), 158.0, 157.7 (*minor*), 155.1, 154.6, 154.0 (*minor*), 143.2, 143.1 (*minor*), 141.8, 141.2 (*minor*), 137.0, 136.8 (*minor*), 134.6, 130.0 (*minor*), 129.6, 129.4 (*minor*), 128.1 (*minor*), 127.7 (*minor*), 124.8, 124.5, 124.0 (*minor*), 123.2, 122.91, 122.4, 122.3 (*minor*), 119.1, 118.2, 117.8 (*minor*), 117.7, 117.1, 116.5, 116.3, 116.0, 115.8, 114.2 (*minor*), 113.9, 113.8 (*minor*), 80.1, 79.9 (*minor*), 54.2, 53.7 (*minor*), 52.5, 52.4 (*minor*), 29.1, 28.4. **IR (ATR)**: 1729, 1688, 1606, 1454, 1419, 1153, 1126, 907, 723, 647 cm<sup>-1</sup>. **MS (ESI-TOF) *m/z* (relative intensity)**: 589.2 (100) [M+Na]<sup>+</sup>. **HR-MS (ESI-TOF) *m/z***: [M+Na]<sup>+</sup> Calcd. for C<sub>32</sub>H<sub>30</sub>N<sub>4</sub>O<sub>6</sub> 589.2058; found 589.2051.

**Methyl (S)-2-[(S)-2-[(*tert*-butoxycarbonyl)amino]-4-(methylthio)butanamido]-3-{2-[2-(2-oxo-2H-chromen-7-yl)vinyl]-1-(pyridin-2-yl)-1H-indol-3-yl]propanoate (6)**

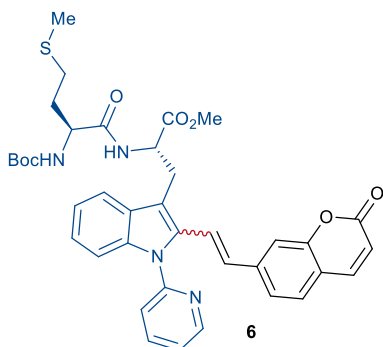

Following the general procedure **GP1** the corresponding dipeptide (52.7 mg, 0.10 mmol, 1.0 equiv.) and alkyne (20.4 mg, 0.12 mmol, 1.2 equiv.) were used. Purification by *flash*-column chromatography on silica gel (DCM/MeOH 10:0.15) yielded **6** (43.9 mg, 63%, *E/Z* = 9:1) as a bright yellow solid. **Mp.**: = 114.8°C. **<sup>1</sup>H NMR** (300 MHz, CDCl<sub>3</sub>) δ 8.72 (d, *J* = 4.2 Hz, 0.86H *major*), 8.53 (d, *J* = 4.2 Hz, 0.07H *minor*), 8.19 – 7.76 (m, 1H), 7.63 (dd, *J* = 8.7, 4.0 Hz, 3H), 7.50 – 7.33 (m, 5H), 7.30 – 7.06 (m, 5H), 6.77 – 6.62 (m, 1H), 6.33 (d, *J* = 9.5 Hz, 1H), 6.19 (s, 1H), 5.47 (d, *J* = 7.7 Hz, 1H), 4.58 – 4.44 (m, 1H), 4.38 (d, *J* = 6.4 Hz, 1H), 3.58 (d, *J* = 4.3 Hz, 1H), 3.49 – 3.33 (m, 3H), 2.40 – 2.12 (m, 3H), 1.96 (s, 3H), 1.44 (d, *J* = 7.1 Hz, 9H). **<sup>13</sup>C NMR** (75 MHz, CDCl<sub>3</sub>) δ = 171.2, 161.0, 155.3, 154.6, 151.8, 149.9, 149.0, 143.1, 141.6, 138.6, 138.3, 133.9, 129.8, 128.9, 128.1, 127.7 (*minor*), 124.3, 122.9, 122.7, 122.4, 121.6, 121.5 (*minor*), 120.2, 119.2, 118.2, 115.9, 114.1, 114.0, 110.9, 80.3, 55.5, 52.6 (*minor*), 52.5, 51.8, 51.7 (*minor*), 32.0, 29.8, 29.6, 29.1, 28.5, 28.3 (*minor*) 15.4. **IR (ATR)**: 1729, 1665, 1606, 1469, 1435, 1366, 1163, 1126, 1101, 906, 833, 721, 646, 616 cm<sup>-1</sup>. **MS**



**(ESI-TOF)  $m/z$  (relative intensity):** 719.2 (100)  $[M+Na]^+$ . **HR-MS (ESI-TOF)  $m/z$ :**  $[M+Na]^+$  Calcd. for  $C_{38}H_{40}N_4O_7S$  719.2502; found 719.2510.

**Methyl (S)-2-((2S,3S)-2-[(tert-butoxycarbonyl)amino]-3-hydroxybutanamido)-3-{2-[2-(2-oxo-2H-chromen-7-yl)vinyl]-1-(pyridin-2-yl)-1H-indol-3-yl}propanoate (7)**

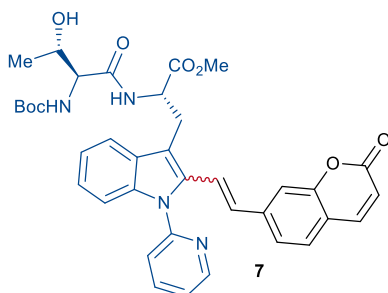

Following the general procedure **GP1** the corresponding dipeptide (49.6 mg, 0.10 mmol, 1.0 equiv.) and alkyne (20.4 mg, 0.12 mmol, 1.2 equiv.) were used. Purification by *flash*-column chromatography on silica gel (DCM/MeOH 10:0.15) and purification by GPC yielded **7** (34.0 mg, 51%,  $E/Z = >9:1$ ) as a bright yellow solid. **Mp.:** = 132°C.  **$^1H$  NMR** (300 MHz,  $CDCl_3$ )  $\delta$  8.68 (d,  $J = 4.90$  Hz, 0.93 H, *major*), 8.39 (d,  $J = 4.90$  Hz, 0.05H *minor*), 7.94 (td,  $J = 7.7, 1.9$  Hz, 1H), 7.72 (dd,  $J = 6.7, 1.9$  Hz, 1H), 7.63 (d,  $J = 9.5$  Hz, 1H), 7.49 (d,  $J = 7.9$  Hz, 1H), 7.45 – 7.30 (m, 5H), 7.24 – 7.07 (m, 3H), 6.55 (d,  $J = 16.6$  Hz, 1H), 6.44 (d,  $J = 7.5$  Hz, 1H), 6.33 (d,  $J = 9.5$  Hz, 1H), 5.50 (d,  $J = 7.3$  Hz, 1H), 4.57 (q,  $J = 7.0$  Hz, 1H), 4.29 (dd,  $J = 7.7, 3.6$  Hz, 1H), 4.10 – 3.99 (m, 1H), 3.61 – 3.35 (m, 5H), 2.94 (d,  $J = 6.0$  Hz, 1H), 1.44 (s, 8.59H *major*), 1.34 (s, 0.71H *minor*), 1.06 (d,  $J = 6.4$  Hz, 3H).  **$^{13}C$  NMR** (75 MHz,  $CDCl_3$ )  $\delta$  171.8, 170.4, 161.0, 155.5, 154.5, 151.8, 149.9, 143.2, 141.5, 138.9, 138.5, 134.1, 129.9, 128.9, 128.1, 124.4, 122.9, 122.8, 122.5, 121.7, 120.4, 119.5, 118.2, 116.0, 114.8, 114.2, 110.7, 80.3, 68.3, 58.0, 55.5, 52.5, 28.9, 28.3, 20.1. **IR (ATR):** 1729, 1699, 1663, 1605, 1469, 1454, 1436, 1366, 1165, 1165, 1127, 908, 726, 646  $cm^{-1}$ . **MS (ESI-TOF)  $m/z$  (relative intensity):** 689.2 (100)  $[M+Na]^+$ . **HR-MS (ESI-TOF)  $m/z$ :**  $[M+Na]^+$  Calcd. for  $C_{37}H_{38}N_4O_8$  689.2573; found 689.2582.

**Isopropyl**      **{(S)-2-[(tert-butoxycarbonyl)amino]-3-(2-[2-(2-oxo-2H-chromen-7-yl)vinyl]-1-(pyridin-2-yl)-1H-indol-3-yl]propanoyl}-L-tryptophanate (8)**

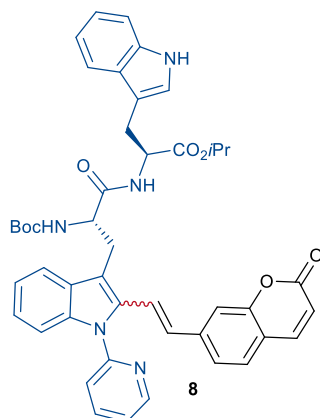

Following the general procedure **GP1** the corresponding dipeptide (60.9 mg, 0.10 mmol, 1.0 equiv.) and alkyne (20.4 mg, 0.12 mmol, 1.2 equiv.) were used. Purification by *flash*-column chromatography on silica gel (DCM/MeOH 10:0.15) and purification by GPC yielded **8** (40.2 mg, 51%, *E/Z* = 8:2) as a bright yellow solid. **Mp.**: = 111°C. **<sup>1</sup>H NMR** (300 MHz, CDCl<sub>3</sub>) δ 8.77 (d, *J* = 5.0 Hz, 0.8 H, *major*), 8.68 (s, 0.8 H, *major*), 8.56 (s, 0.2 H, *minor*), 8.42 (d, *J* = 5.0 Hz, 0.2 H, *minor*), 7.88 (td, *J* = 7.8 Hz, 2.0, 1H), 7.77 – 7.69 (m, 1H), 7.64 (d, *J* = 9.4 Hz, 1H), 7.50 – 7.32 (m, 6H), 7.25–7.15 (m, 3H), 7.18 – 6.81 (m, 4H), 6.75 (d, *J* = 12.0 Hz, 0.2 H, *minor*), 6.57 (d, *J* = 12.0 Hz, 0.2 H, *minor*), 6.52 – 6.42 (m, 1H), 6.42 – 6.27 (m, 2H), 6.20 (d, *J* = 7.0 Hz, 1H), 5.27 (d, *J* = 7.1 Hz, 0.8 H, *major*), 5.03 (d, *J* = 7.1, 0.2 H, *minor*), 4.95 – 4.73 (m, 1H), 4.69 (q, *J* = 6.1 Hz, 0.2 H, *minor*), 4.66 – 4.38 (m, 2H), 3.71 – 3.46 (m, 1H), 3.44 – 3.27 (m, 1H), 3.21 – 3.09 (m, 1H), 3.08 – 2.92 (m, 1H), 1.85 (s, 1H), 1.42 (s, 7.47H *major*), 1.31 (s, 1.86H *minor*), 1.14 – 1.00 (m, 6H). **<sup>13</sup>C NMR** (75 MHz, CDCl<sub>3</sub>) δ 170.9 (*minor*), 170.9, 170.6, 161.0, 160.9 (*minor*), 155.3, 154.5 (*minor*), 153.9 (*minor*), 152.0, 149.7, 148.8, 143.1, 141.4 (*minor*), 138.9, 138.6, 136.1 (*minor*), 136.1, 134.1, 133.1, 132.4, 129.8, 129.0, 128.0, 127.7 (*minor*), 127.6, 124.5, 124.4 (*minor*), 124.0 (*minor*), 123.0, 122.8, 122.7, 122.0, 121.6, 121.5 (*minor*), 120.9 (*minor*), 120.3, 119.7, 119.4, 118.6 (*minor*), 118.6, 118.1, 118.0 (*minor*), 116.5, 116.3, 115.9, 114.6, 114.3, 111.3 (*minor*), 111.3, 110.8, 109.7 (*minor*), 109.6, 80.1, 69.3 (*minor*), 69.2, 55.3, 53.3, 53.2 (*minor*), 28.4, 28.3 (*minor*), 27.4 (*minor*), 27.4, 21.7, 21.7. **IR (ATR)**: 1729, 1699, 1454, 1226, 1103, 905, 724, 646, 616 cm<sup>-1</sup>. **MS (ESI-TOF) *m/z* (relative intensity)**: 802.3 [M+Na]<sup>+</sup>. **HR-MS (ESI-TOF) *m/z***: [M + Na]<sup>+</sup> Calcd. for C<sub>46</sub>H<sub>45</sub>N<sub>5</sub>O<sub>7</sub> 802.3203; found 802.3211.

**Methyl (S)-2-[(*tert*-butoxycarbonyl)amino]-3-{2-[2-[3-(4-methoxyphenyl)-4-oxo-4*H*-chromen-7-yl]vinyl]-1-(pyridin-2-yl)-1*H*-indol-3-yl}propanoate (**9**)**

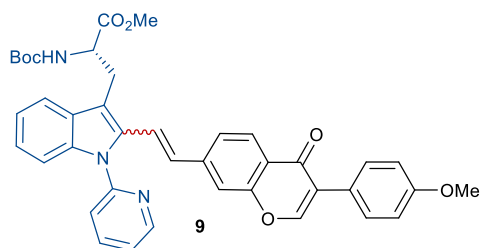

Following the general procedure **GP1** the corresponding tryptophane (39.6 mg, 0.10 mmol, 1.0 equiv.) and alkyne (30.4 mg, 0.11 mmol, 1.1 equiv.) were used. Purification by *flash*-column chromatography on silica gel (DCM/MeOH 10:0.15) yielded **9** (56.5 mg, 84%, *E/Z* = 9:1) as an orange solid. **Mp.**: = 115°C. **<sup>1</sup>H NMR** (300 MHz, CDCl<sub>3</sub>) δ 8.76 (d, *J* = 4.9 Hz, 0.9H, *major*), 8.43 (d, *J* = 4.9 Hz, 0.1 H, *minor*), 8.23 (d, *J* = 8.4 Hz, 1H), 7.97 (s, 1H), 7.92 (td, *J* = 7.8 Hz, 2.1, 1H), 7.62 (d, *J* = 7.6 Hz, 1H), 7.51 (d, *J* = 8.8 Hz, 2H), 7.48 – 7.33 (m, 5H), 7.21 (t, *J* = 6.7 Hz, 2H), 6.97 (d, *J* = 8.8 Hz, 3H), 6.85 (d, *J* = 12.0 Hz, 0.1 H, *minor*), 6.67 (d, *J* = 12.0 Hz, 0.1 H, *minor*), 6.54 (d, *J* = 16.6 Hz, 0.9 H, *major*), 5.28 (d, *J* = 8.3 Hz, 1H), 4.79 – 4.77 (m, 1H), 3.86 (s, 3H), 3.66 – 3.45 (m, 5H), 1.42 (s, 9H). **<sup>13</sup>C NMR** (75 MHz, CDCl<sub>3</sub>) δ 176.1, 172.7, 159.8, 156.7, 155.2, 152.6, 152.1, 149.9, 143.0, 138.6, 134.0, 130.2, 129.6, 129.1, 126.7, 125.2, 124.5, 124.2, 123.5, 123.1, 122.6, 122.3, 121.5, 120.8, 119.4, 115.4, 115.0, 114.1, 111.0, 80.1, 55.5, 54.5, 52.6, 28.9, 28.4. **IR (ATR)**: 1745, 1608, 1555, 1468, 1431, 1366, 1177, 1149, 907, 724, 646, 614 cm<sup>-1</sup>. **MS (ESI-TOF) *m/z* (relative intensity)**: 694.2 (100) [M+Na]<sup>+</sup>. **HR-MS (ESI-TOF) *m/z***: [M+Na]<sup>+</sup> Calcd. for C<sub>40</sub>H<sub>37</sub>N<sub>3</sub>O<sub>7</sub> 694.2521; found 694.2524.

**Methyl (S)-2-acetamido-3-{2-[2-[3-(4-methoxyphenyl)-4-oxo-4*H*-chromen-7-yl]vinyl]-1-(pyridin-2-yl)-1*H*-indol-3-yl}propanoate (**10**)**

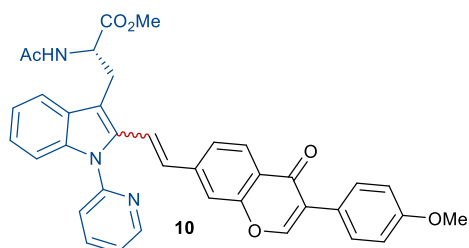

Following the general procedure **GP1** the corresponding tryptophane (39.6 mg, 0.10 mmol, 1.0 equiv.) and alkyne (30.4 mg, 0.11 mmol, 1.1 equiv.) were used. Purification by *flash*-column chromatography on silica gel (DCM/MeOH 10:0.15) yielded **10** (41.7 mg, 68%, *E/Z* = 8:2) as an orange solid. **Mp.**: = 109.8°C. **<sup>1</sup>H NMR** (300 MHz, CDCl<sub>3</sub>) δ 8.73 (d, *J* = 7.6 Hz, 0.82H, *major*), 8.39 (d, *J* = 4.9 Hz, 0.18H, *minor*), 8.19 (d, *J* = 8.8 Hz, 1H), 7.99 – 7.86 (m, 2H), 7.55 (d, *J* = 7.7 Hz, 1H), 7.48 (d, *J* = 8.26 Hz, 2H), 7.43 – 7.30 (m, 5H), 7.29 – 7.04 (m, 3H), 6.96 (d, *J* = 8.9 Hz, 2H), 6.79 (d, *J* = 12.0 Hz, 0.19H, *minor*), 6.63 (d, *J* = 12.2 Hz, 0.17H, *minor*), 6.44 (d, *J* = 16.6 Hz, 0.82H, *major*), 6.26 (d, *J* = 7.9 Hz, 0.74H, *major*), 6.15 (d, *J* = 7.6 Hz, 0.20H, *minor*), 5.06 – 4.87 (m, 1H), 3.82 (s,

3H), 3.63 – 3.54 (m, 2H), 3.53 (s, 3H), 1.88 (s, 3H).  $^{13}\text{C NMR}$  (75 MHz,  $\text{CDCl}_3$ )  $\delta$  176.1, 172.4 (*minor*), 172.3, 169.9, 169.8 (*minor*), 159.7, 156.7, 156.1 (*minor*), 152.6, 152.0, 150.9 (*minor*), 149.9, 149.1, 142.8, 142.2 (*minor*), 138.7, 137.7, 137.4 (*minor*), 134.1, 133.0, 131.3 (*minor*), 130.2, 129.5, 129.0, 126.8, 126.2 (*minor*), 125.4 (*minor*), 125.2, 125.0 (*minor*), 124.6, 124.2, 124.0 (*minor*), 123.5, 123.4 (*minor*), 122.9, 122.8, 122.4, 122.2 (*minor*), 121.5, 120.7 (*minor*), 120.5, 119.1, 117.4, 115.3, 114.7, 114.1, 112.7 (*minor*), 111.3 (*minor*), 111.0, 55.4, 53.1, 52.9 (*minor*), 52.7, 52.5 (*minor*), 27.9, 27.6 (*minor*), 23.3. **IR (ATR):** 1637, 1608, 1433, 1248, 1227, 1177, 1028, 904, 885, 724, 646, 547  $\text{cm}^{-1}$ . **MS (ESI-TOF)  $m/z$  (relative intensity):** 636.2 (100)  $[\text{M}+\text{H}]^+$ . **HR-MS (ESI-TOF)  $m/z$ :**  $[\text{M}+\text{H}]^+$  Calcd. for  $\text{C}_{37}\text{H}_{31}\text{N}_3\text{O}_6$  636.2105; found 636.2106.

**Methyl (*S,E*)-2-acetamido-3-{2-{3-[(2-oxo-2*H*-chromen-7-yl)oxy]prop-1-en-1-yl}-1-(pyridin-2-yl)-1*H*-indol-3-yl}propanoate (12)**

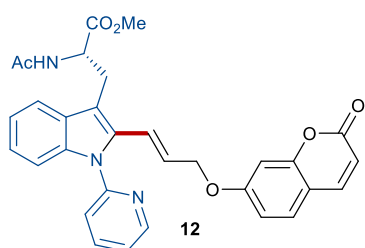

Following the general procedure **GP1** the corresponding amino acid (33.7 mg, 0.10 mmol, 1.0 equiv.) and alkyne (22.2 mg, 0.11 mmol, 1.1 equiv.) were used. Purification by *flash*-column chromatography on silica gel ( $\text{DCM}/\text{MeOH}$  10:0.15) yielded **12** (50.0 mg, 93%, *E/Z* = >20:1) as a light orange solid. **Mp.:** = 110°C  $^1\text{H NMR}$  (300 MHz,  $\text{CDCl}_3$ )  $\delta$  8.66 (d,  $J$  = 6.0 Hz, 1H), 7.86 (dt,  $J$  = 7.8, 1.8 Hz, 1H), 7.65 (d,  $J$  = 9.6 Hz, 1H), 7.56 (d,  $J$  = 9.2 Hz, 1H), 7.46 – 7.29 (m, 4H), 7.28 – 7.16 (m, 2H), 6.93 – 6.74 (m, 3H), 6.27 (d,  $J$  = 9.5 Hz, 1H), 6.18 (d,  $J$  = 7.8 Hz, 1H), 5.77 (dt,  $J$  = 16.3, 5.4 Hz, 1H), 4.96 (q,  $J$  = 6.6 Hz, 1H), 4.70 (d,  $J$  = 5.5 Hz, 2H), 3.61 (s, 3H), 3.57 – 3.41 (m, 2H), 1.96 (s, 3H).  $^{13}\text{C NMR}$  (75 MHz,  $\text{CDCl}_3$ )  $\delta$  172.4, 169.8, 161.6, 161.2, 155.9, 151.8, 149.7, 143.5, 138.5, 138.1, 133.6, 128.9, 128.8, 127.2, 124.1, 122.6, 122.2, 122.1, 121.3, 119.0, 113.4, 113.3, 112.8, 112.8, 111.0, 101.8, 69.0, 53.0, 52.6, 27.6, 23.3. **IR (ATR):** 1723, 1656, 1609, 1505, 1469, 1454, 1435, 1274, 1228, 1121, 908, 834, 725, 616  $\text{cm}^{-1}$ . **MS (ESI-TOF)  $m/z$  (relative intensity):** 560.2 (100)  $[\text{M}+\text{Na}]^+$ . **HR-MS (ESI-TOF)  $m/z$ :**  $[\text{M}+\text{Na}]^+$  Calcd. for  $\text{C}_{31}\text{H}_{27}\text{N}_3\text{O}_6$  560.1792; found 560.1794.

**Methyl (*S,E*)-2-[(*tert*-butoxycarbonyl)amino]-3-{2-{3-[(2-oxo-2*H*-chromen-7-yl)oxy]prop-1-en-1-yl}-1-(pyrimidin-2-yl)-1*H*-indol-3-yl}propanoate (13)**

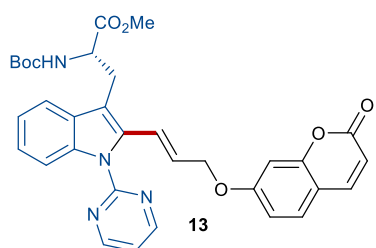

Following the general procedure **GP1** the corresponding tryptophane (34.1 mg, 0.10 mmol, 1.0 equiv.) and alkyne (22.2 mg, 0.11 mmol, 1.1 equiv.) were used. Purification by *flash*-column chromatography on silica gel (DCM/MeOH 10:0.15) yielded **13** (52.4 mg, 88%, *E/Z* = >20:1) as a light orange solid. **Mp.**: = 111–112°C. <sup>1</sup>H NMR (300 MHz, CDCl<sub>3</sub>) δ 8.82 (d, *J* = 4.8 Hz, 2H), 8.26 (d, *J* = 8.1 Hz, 1H), 7.64 (d, *J* = 9.5 Hz, 1H), 7.60 (d, *J* = 7.7 Hz, 1H), 7.38 (d, *J* = 9.2 Hz, 1H), 7.35 – 7.13 (m, 3H), 7.09 (d, *J* = 16.3 Hz, 1H), 6.92 (dq, *J* = 4.5, 2.4 Hz, 2H), 6.26 (d, *J* = 9.5 Hz, 1H), 6.05 (dt, *J* = 16.6, 5.6 Hz, 1H), 5.17 (d, *J* = 8.2 Hz, 1H), 4.84 (d, *J* = 7.4 Hz, 2H), 4.65 (q, *J* = 6.8 Hz, 1H), 3.60 (s, 3H), 3.39 (d, *J* = 6.9 Hz, 2H), 1.40 (s, 9H). <sup>13</sup>C NMR (75 MHz, CDCl<sub>3</sub>) δ 172.9, 161.9, 161.2, 158.4, 158.0, 155.9, 155.1, 143.5, 136.6, 134.3, 129.8, 128.9, 127.1, 124.8, 124.4, 122.2, 119.0, 117.5, 117.4, 114.6, 113.9, 113.6, 113.3, 113.2, 112.7, 101.9, 80.0, 69.3, 54.2, 52.4, 28.4. **IR (ATR)**: 1700, 1610, 1560, 1420, 1343, 1154, 1120, 906, 833, 724, 647 cm<sup>-1</sup>. **MS (ESI-TOF) *m/z* (relative intensity)**: 619.2 (100) [M+Na]<sup>+</sup>. **HR-MS (ESI-TOF) *m/z***: [M+Na]<sup>+</sup> Calcd. for C<sub>33</sub>H<sub>32</sub>N<sub>4</sub>O<sub>7</sub> 619.2172; found 619.2163.

**Methyl (*S,E*)-2-acetamido-3-{2-[3-[(2-oxo-2*H*-chromen-7-yl)oxy]prop-1-en-1-yl]-1-(pyridin-2-yl)-1*H*-indol-3-yl}propanoate (**14**)**

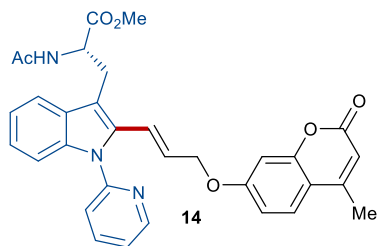

Following the general procedure **GP1** the corresponding tryptophane (33.7 mg, 0.10 mmol, 1.0 equiv.) and alkyne (23.5 mg, 0.11 mmol, 1.1 equiv.) were used. Purification by *flash*-column chromatography on silica gel (DCM/MeOH 10:0.15) yielded **14** (44.1 mg, 80%, *E/Z* = >20:1) as a light orange solid. **Mp.**: 121°C. <sup>1</sup>H NMR (400 MHz, CDCl<sub>3</sub>) δ 8.64 (dd, *J* = 4.9, 1.1 Hz, 1H), 7.84 (td, *J* = 7.6, 1.9 Hz, 1H), 7.53 (dd, *J* = 6.2, 1.5 Hz, 1H), 7.48 (d, *J* = 8.8 Hz, 1H), 7.39 – 7.30 (m, 2H), 7.27 (d, *J* = 7.7 Hz, 1H), 7.21 – 7.12 (m, 2H), 6.85 (dd, *J* = 8.8, 2.5 Hz, 1H), 6.76 (dd, *J* = 16.1, 2.1 Hz, 2H), 6.18 (d, *J* = 7.8 Hz, 1H), 6.13 (d, *J* = 1.3 Hz, 1H), 5.74 (dt, *J* = 16.4, 5.6 Hz, 1H), 4.96 – 4.88 (m, 1H), 4.65 (dd, *J* = 5.6, 1.6 Hz, 2H), 3.59 (s, 3H), 3.51 – 3.39 (m, 2H), 2.39 (s, 3H), 1.93 (s, 3H). <sup>13</sup>C NMR (101 MHz, CDCl<sub>3</sub>) δ 172.3, 169.8, 161.3, 161.2, 155.2, 152.6, 151.7, 149.6, 138.6, 138.5, 138.0, 133.5, 128.7, 127.2, 125.7, 124.0, 122.5, 122.2, 122.0, 121.2, 118.9, 113.8, 112.9, 112.9, 112.8, 112.1, 110.9, 101.8, 77.1, 68.9, 53.0, 52.5, 27.5, 23.2, 18.7. **IR (ATR)**: 1723, 1656, 1609, 1505, 1469, 1454, 1435, 1274, 1228, 1121, 908, 834, 725, 616 cm<sup>-1</sup>. **MS (ESI-TOF) *m/z* (relative intensity)**: 574.2 (100) [M+Na]<sup>+</sup>, **HR-MS (ESI-TOF) *m/z***: [M+Na]<sup>+</sup> Calcd. for C<sub>32</sub>H<sub>29</sub>N<sub>3</sub>O<sub>6</sub> 574.1949; found 574.1949.

**Methyl (S,E)-2-[(tert-butoxycarbonyl)amino]-3-{2-[3-[(4-methyl-2-oxo-2H-chromen-7-yl)oxy]prop-1-en-1-yl]-1-(pyridin-2-yl)-1H-indol-3-yl}propanoate (15)**

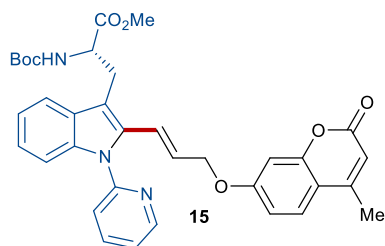

Following the general procedure **GP1** the corresponding amino acid (39.6 mg, 0.10 mmol, 1.0 equiv.) and alkyne (23.5 mg, 0.11 mmol, 1.1 equiv.) were used. Purification by *flash*-column chromatography on silica gel (DCM/MeOH 10:0.15) yielded **15** (41.4 mg, 68%, *E/Z* = >20:1) as a light orange solid. **Mp.**: = 118–119°C. **<sup>1</sup>H NMR** (300 MHz, CDCl<sub>3</sub>) δ 8.64 (d, *J* = 4.9 Hz, 1H), 7.83 (td, *J* = 7.8 Hz, 2.0, 1H), 7.57 (d, *J* = 7.1 Hz, 1H), 7.48 (d, *J* = 8.8 Hz, 1H), 7.38 (d, *J* = 7.1 Hz, 1H), 7.34 – 7.24 (m, 2H), 7.18 (dq, *J* = 8.7, 3.8, 2.4 Hz, 2H), 6.85 (dd, *J* = 8.8, 2.5 Hz, 1H), 6.81 – 6.65 (m, 2H), 6.14 (s, 1H), 5.77 (dt, *J* = 16.3, 5.6 Hz, 1H), 5.15 (d, *J* = 8.3 Hz, 1H), 4.66 (d, *J* = 4.8 Hz, 2H), 3.60 (s, 3H), 3.39 (d, *J* = 6.3 Hz, 2H), 2.39 (s, 3H), 1.51 – 1.19 (m, 10H). **<sup>13</sup>C NMR** (75 MHz, CDCl<sub>3</sub>) δ 172.7, 161.5, 161.3, 155.3, 155.2, 152.6, 151.8, 149.7, 138.4, 138.0, 133.5, 128.9, 127.4, 125.7, 124.0, 122.4, 122.3, 122.1, 121.3, 119.2, 113.9, 113.1, 112.9, 112.2, 111.0, 101.9, 80.0, 69.1, 54.3, 52.5, 38.9, 36.6, 28.4, 18.8. **IR (ATR)**: 1747, 1699, 1611, 1469, 1435, 1366, 1135, 907, 723, 646 cm<sup>-1</sup>. **MS (ESI-TOF) *m/z* (relative intensity)**: 632.2 (100) [M+Na]<sup>+</sup>. **HR-MS (ESI-TOF) *m/z***: [M+Na]<sup>+</sup> Calcd. for C<sub>35</sub>H<sub>35</sub>N<sub>3</sub>O<sub>7</sub> 632.2363; found 632.2367.

**Methyl (S,E)-2-[(tert-butoxycarbonyl)amino]-3-{2-[3-[(2-oxo-2H-chromen-7-yl)oxy]prop-1-en-1-yl]-1-(pyridin-2-yl)-1H-indol-3-yl}propanoate (16)**

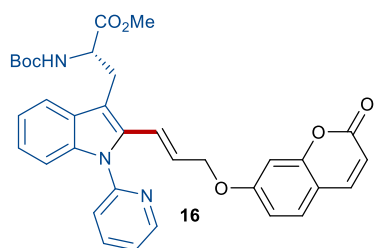

Following the general procedure **GP1** the corresponding amino acid (39.6 mg, 0.10 mmol, 1.0 equiv.) and alkyne (22.2 mg, 0.11 mmol, 1.1 equiv.) were used. Purification by *flash*-column chromatography on silica gel (DCM/MeOH 10:0.15) yielded **16** (53.0 mg, 89%, *E/Z* = >20:1) as a light orange solid. **Mp.**: = 111°C. **<sup>1</sup>H NMR** (300 MHz, CDCl<sub>3</sub>) δ 8.64 (d, *J* = 4.4 Hz, 1H), 7.82 (td, *J* = 7.7 Hz, 2.0, 1H), 7.63 (d, *J* = 9.7 Hz, 1H), 7.57 (d, *J* = 7.6 Hz, 1H), 7.45 – 7.24 (m, 4H), 7.24 – 7.08 (m, 2H), 6.83 (dd, *J* = 8.6, 2.4 Hz, 1H), 6.80 – 6.69 (m, 2H), 6.26 (d, *J* = 9.5 Hz, 1H), 5.78 (dt, *J* = 16.4, 5.6 Hz, 1H), 5.14 (d, *J* = 8.3 Hz, 1H), 4.66 (d, *J* = 4.2 Hz, 2H), 3.60 (s, 3H), 3.40 (d, *J* = 6.3 Hz, 2H), 1.70 (s, 1H), 1.39 (s, 9H). **<sup>13</sup>C NMR** (75 MHz, CDCl<sub>3</sub>) δ 172.8, 161.7, 161.2, 155.9, 155.2, 151.8, 149.7,

143.5, 138.5, 138.0, 133.5, 128.9, 127.3, 124.0, 122.5, 122.3, 122.2, 121.3, 119.2, 113.4, 113.3, 113.1, 112.8, 111.0, 101.9, 80.0, 69.1, 54.3, 52.5, 28.4. **IR (ATR):** 1741, 1701, 1610, 1505, 1155, 1121, 1015, 908, 834, 725, 647 cm<sup>-1</sup>. **MS (ESI-TOF) *m/z* (relative intensity):** 618.2 (100) [M+Na]<sup>+</sup>. **HR-MS (ESI-TOF) *m/z*:** [M+Na]<sup>+</sup> Calcd. for C<sub>34</sub>H<sub>33</sub>N<sub>3</sub>O<sub>7</sub> 618.2203; found 618.2211.

**Isopropyl {(S)-2-[(*tert*-butoxycarbonyl)amino]-3-{2-[(*E*)-3-[(2-oxo-2*H*-chromen-7-yl)oxy]prop-1-en-1-yl]-1-(pyridin-2-yl)-1*H*-indol-3-yl}propanoyl}-L-tryptophanate (17)**

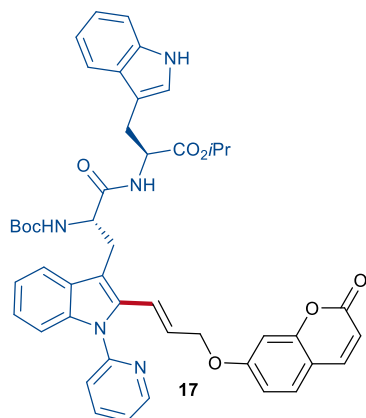

Following the general procedure **GP1** the corresponding dipeptide (61.0 mg, 0.10 mmol, 1.0 equiv.) and alkyne (22.2 mg, 0.11 mmol, 1.1 equiv.) were used. Purification by *flash*-column chromatography on silica gel (DCM/MeOH 10:0.15) yielded **17** (53.0 mg, 66%, *E/Z* = >20:1) as a light orange solid. **Mp.:** = 131–132°C. **<sup>1</sup>H NMR** (300 MHz, CDCl<sub>3</sub>) δ 8.68 (dd, *J* = 4.9, 2.0 Hz, 2H), 7.80 (td, *J* = 7.8 Hz, 2.0, 1H), 7.75 – 7.65 (m, 1H), 7.60 (d, *J* = 9.5 Hz, 1H), 7.46 – 7.28 (m, 4H), 7.25 – 7.14 (m, 4H), 7.08 (t, *J* = 7.5 Hz, 1H), 6.98 (t, *J* = 7.4 Hz, 1H), 6.79 (dd, *J* = 8.8, 2.5 Hz, 1H), 6.75 – 6.66 (m, 1H), 6.49 (s, 1H), 6.24 (d, *J* = 9.4 Hz, 2H), 5.67 (dt, *J* = 16.4, 5.6 Hz, 1H), 5.15 (s, 1H), 4.95 – 4.72 (m, 1H), 4.64 – 4.38 (m, 4H), 3.48 (d, *J* = 13.5 Hz, 1H), 3.38 – 3.22 (m, 1H), 3.12 (qd, *J* = 14.9, 5.8 Hz, 2H), 1.80 (s, 1H), 1.38 (s, 9H), 1.10 (d, *J* = 3.8 Hz, 6H). **<sup>13</sup>C NMR** (75 MHz, CDCl<sub>3</sub>) δ 171.0, 170.8, 161.7, 161.3, 155.8, 155.2, 151.8, 149.5, 143.5, 138.7, 138.1, 136.1, 133.5, 128.8, 128.7, 127.7, 124.1, 123.0, 122.7, 122.6, 122.3, 122.0, 121.5, 119.7, 119.4, 118.6, 113.3, 113.2, 112.7, 111.3, 110.9, 109.7, 102.0, 69.2, 69.1, 55.1, 53.3, 28.4, 28.1, 27.3, 21.8, 21.7. **IR (ATR):** 1729, 1703, 1610, 1469, 1454, 1228, 1123, 1103, 906, 834, 723, 647, 616 cm<sup>-1</sup>. **MS (ESI-TOF) *m/z* (relative intensity):** 832.3 (100) [M+Na]<sup>+</sup>. **HR-MS (ESI-TOF) *m/z*:** [M+Na]<sup>+</sup> Calcd. for C<sub>47</sub>H<sub>47</sub>N<sub>5</sub>O<sub>8</sub> 832.3309; found 832.3317.

**Methyl (S,E)-2-[(tert-butoxycarbonyl)amino]-3-{2-[3-[[3-(4-methoxyphenyl)-4-oxo-4H-chromen-7-yl]oxy]prop-1-en-1-yl]-1-(pyridin-2-yl)-1H-indol-3-yl}propanoate (18)**

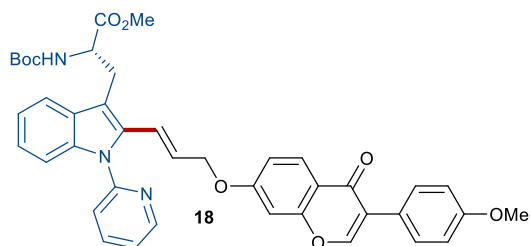

Following the general procedure **GP1** the corresponding amino acid (39.5 mg, 0.10 mmol, 1.0 equiv.) and alkyne (33.7 mg, 0.11 mmol, 1.1 equiv.) were used. Purification by *flash*-column chromatography on silica gel (DCM/MeOH 10:0.15) yielded **18** (56.7 mg, 80%, *E/Z* = >20:1) as a dark orange solid. **Mp.**: = 141 °C. **<sup>1</sup>H NMR** (300 MHz, CH<sub>2</sub>Cl<sub>2</sub>) δ 8.63 (d, *J* = 5.4 Hz, 1H), 8.22 (d, *J* = 8.9 Hz, 1H), 7.99 – 7.73 (m, 2H), 7.72 – 7.47 (m, 4H), 7.47 – 7.36 (m, 7H), 7.33 – 7.14 (m, 2H), 7.00 (d, *J* = 8.4 Hz, 1H), 5.81 (d, *J* = 16.3 Hz, 1H) 5.19 (d, *J* = 7.9 Hz, 1H), 4.74 (d, *J* = 5.6 Hz, 2H), 3.87 (s, 3H), 3.63 (s, 3H), 3.43 (d, *J* = 6.7 Hz, 2H), 1.42 (s, 9H). **<sup>13</sup>C NMR** (75 MHz, CDCl<sub>3</sub>) δ 176.0, 172.8, 162.8, 159.8, 157.9, 152.2, 151.9, 149.7, 138.4, 138.1, 133.5, 130.1, 128.9, 128.0, 127.2, 125.1, 124.3, 124.1, 122.4, 122.2, 121.4, 119.3, 118.7, 115.1, 114.1, 113.2, 111.0, 101.3, 80.0, 69.2, 55.5, 54.3, 52.5, 28.4. **IR (ATR)**: 1701, 1608, 1436, 1366, 1244, 1177, 1029, 906, 832, 724, 548 cm<sup>-1</sup>. **MS (ESI-TOF) *m/z* (relative intensity)**: 724.2 [M+Na]<sup>+</sup>. HR-MS (ESI-TOF) *m/z*: [M+Na]<sup>+</sup> Calcd. for C<sub>41</sub>H<sub>39</sub>N<sub>3</sub>O<sub>8</sub> 724.2619; found 724.2629.

**Methyl (S,E)-2-acetamido-3-{2-[3-[[3-(4-methoxyphenyl)-4-oxo-4H-chromen-7-yl]oxy]prop-1-en-1-yl]-1-(pyridin-2-yl)-1H-indol-3-yl}propanoate (19)**

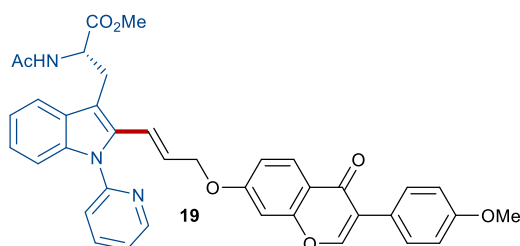

Following the general procedure **GP1** the corresponding tryptophane (33.7 mg, 0.10 mmol, 1.0 equiv.) and alkyne (33.7 mg, 0.11 mmol, 1.1 equiv.) were used. Purification by *flash*-column chromatography on silica gel (DCM/MeOH 10:0.15) yielded in **19** (53.5 mg, 83%, *E/Z* = >20:1) as a dark orange solid. **Mp.**: = 126 °C. **<sup>1</sup>H NMR** (300 MHz, CDCl<sub>3</sub>) δ 8.62 (d, *J* = 3.8 Hz, 1H), 8.19 (d, *J* = 9.0 Hz, 1H), 7.92 (s, 1H), 7.87 – 7.72 (m, 1H), 7.58 – 7.42 (m, 3H), 7.42 – 7.34 (m, 1H), 7.33 – 7.26 (m, 2H), 7.23 – 7.14 (m, 2), 7.07 – 6.89 (m, 3H), 6.86 – 6.71 (m, 2H), 6.22 (d, *J* = 7.8 Hz, 1H), 5.77 (td, *J* = 16.0, 5.7 Hz, 1H) 4.97 – 4.87 (m, 1H), 4.69 (d, *J* = 1.5 Hz, 2H), 3.83 (s, 3H), 3.60 (s, 3H), 3.47 (d, *J* = 9.2 Hz, 2H), 1.95 (s, 3H). **<sup>13</sup>C NMR** (75 MHz, CDCl<sub>3</sub>) δ 175.8, 172.4, 169.8, 162.6, 159.7, 157.8, 152.2, 151.7, 149.6, 138.4, 138.0, 133.6, 130.2, 128.8, 127.9, 127.0, 124.9, 124.2, 124.0,



122.5, 122.2, 122.0, 121.3, 118.9, 118.6, 114.9, 114.0, 112.9, 111.0, 101.3, 69.0, 55.4, 53.0, 52.6, 27.5, 23.20. **IR (ATR):** 1623, 1512, 1246, 1177, 1030, 903, 834, 723, 646, 547  $\text{cm}^{-1}$ . **MS (ESI-TOF)  $m/z$  (relative intensity):** 666.2 (100)  $[\text{M}+\text{Na}]^+$ . **HR-MS (ESI-TOF)  $m/z$ :**  $[\text{M}+\text{Na}]^+$  Calcd. for  $\text{C}_{38}\text{H}_{33}\text{N}_3\text{O}_7$  666.2211; found 666.2206.

**Isopropyl {(S)-2-[(tert-butoxycarbonyl)amino]-3-{2-[(E)-3-[(4-methyl-2-oxo-2H-chromen-7-yl)oxy]prop-1-en-1-yl]-1-(pyridin-2-yl)-1H-indol-3-yl}propanoyl}-L-tryptophanate (20)**

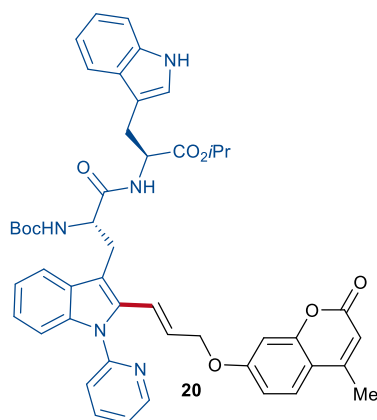

Following the general procedure **GP1** the corresponding dipeptide (61.0 mg, 0.10 mmol, 1.0 equiv.) and alkyne (23.5 mg, 0.11 mmol, 1.1 equiv.) were used. Purification by *flash*-column chromatography on silica gel (DCM/MeOH 10:0.15) yielded **20** (53.6 mg, 65%,  $E/Z = >20:1$ ) as a light orange solid. **Mp.:** = 130–131 °C.  **$^1\text{H NMR}$**  (300 MHz,  $\text{CDCl}_3$ )  $\delta$  8.80 (s, 1H), 8.67 (d,  $J = 5.0$  Hz, 1H), 7.79 (td,  $J = 7.8, 1.9$  Hz, 1H), 7.73 – 7.64 (m, 1H), 7.49 – 7.28 (m, 4H), 7.25 – 7.12 (m, 4H), 7.07 (t,  $J = 7.5$  Hz, 1H), 6.97 (t,  $J = 7.2$  Hz, 1H), 6.80 (dd,  $J = 8.8, 2.5$  Hz, 1H), 6.75 – 6.64 (m, 1H), 6.52 (s, 1H), 6.40 – 6.20 (m, 1H), 6.11 (s, 1H), 5.69 (dt,  $J = 16.3, 5.6$  Hz, 1H), 5.17 (d,  $J = 7.9$  Hz, 1H), 4.90 – 4.77 – 4.79 (m, 1H), 4.71 – 4.35 (m, 4H), 3.47 (d,  $J = 14.4$  Hz, 1H), 3.39 – 3.23 (m, 1H), 3.12 (dq,  $J = 13.3, 5.9$  Hz, 2H), 2.36 (s, 3H), 1.38 (s, 9H), 1.18 – 1.00 (m, 6H).  **$^{13}\text{C NMR}$**  (75 MHz,  $\text{CDCl}_3$ )  $\delta$  171.0, 170.7, 161.4, 161.4, 155.2, 155.1, 152.7, 151.7, 149.4, 138.6, 138.0, 136.1, 133.5, 128.6, 127.7, 127.6, 125.6, 124.0, 123.1, 122.6, 122.5, 122.2, 121.2, 121.4, 119.6, 119.3, 118.5, 113.7, 113.1, 112.9, 112.0, 111.3, 110.9, 109.5, 102.0, 80.0, 69.2, 69.0, 55.0, 53.3, 28.3, 28.1, 27.3, 21.7, 18.7. **IR (ATR):** 1700, 1666, 1469, 1454, 1069, 905, 724, 646  $\text{cm}^{-1}$ . **MS (ESI-TOF)  $m/z$  (relative intensity):** 846.3 (100)  $[\text{M}+\text{Na}]^+$ . **HR-MS (ESI-TOF)  $m/z$ :**  $[\text{M}+\text{Na}]^+$  Calcd. for  $\text{C}_{48}\text{H}_{49}\text{N}_5\text{O}_8$  846.3468; found 846.3473.

### Computational Studies

Calculations were performed using the Gaussian 16, Revision A.03 package.<sup>[5]</sup> All structures were optimized at the TPSS<sup>[5]</sup> level of theory in combination with Grimme's D3 dispersion corrections with the Becke-Johnson damping scheme [D3(BJ)]<sup>[7]</sup> in combination with a def2-SVP basis set.<sup>[8]</sup> Analytical frequency calculations were carried out at the same level of theory in order to identify

the stationary points either as intermediates (no imaginary frequencies) or transition states (only one imaginary frequency), as well as to provide thermal and non-thermal corrections to the free energy in gas-phase at 363 K and 1 atm. The electronic energy was then refined through PW6B95<sup>[9]</sup> single-point calculations on the optimized geometries in combination with a standalone version of Grimme's D4<sup>[10]</sup> dispersion corrections with a def2-TZVP basis set.<sup>[8]</sup> Solvent effects were included through the use of the implicit solvation model SMD<sup>[11]</sup> with a dielectric constant of  $\epsilon = 2.2099$ , which corresponds to 1,4-dioxane, the solvent of choice used in the experimental work. Unless otherwise stated, the energies herein provided are based on gas-phase Gibbs free energies with def2-SVP basis set for which the electronic energies were improved at the PW6B95-D4/def2-TZVP+SMD(1,4-dioxane) level of theory. The first transition state was found to be facile with an energy barrier of 14.2 kcal·mol<sup>-1</sup>. Upon alkyne coordination, migratory insertion was proven to be exergonic with a barrier of 19 kcal·mol<sup>-1</sup>, revealing it to be the rate determining step. Afterwards proto-demetalation (TS(5-6)), takes place leading to the formation of the desired product (complex I-6). The transition state for the corresponding *Z*-isomer could not be calculated. The diastereoselectivity of the hydroarylation likely due to isomerization of secondary intermediates.

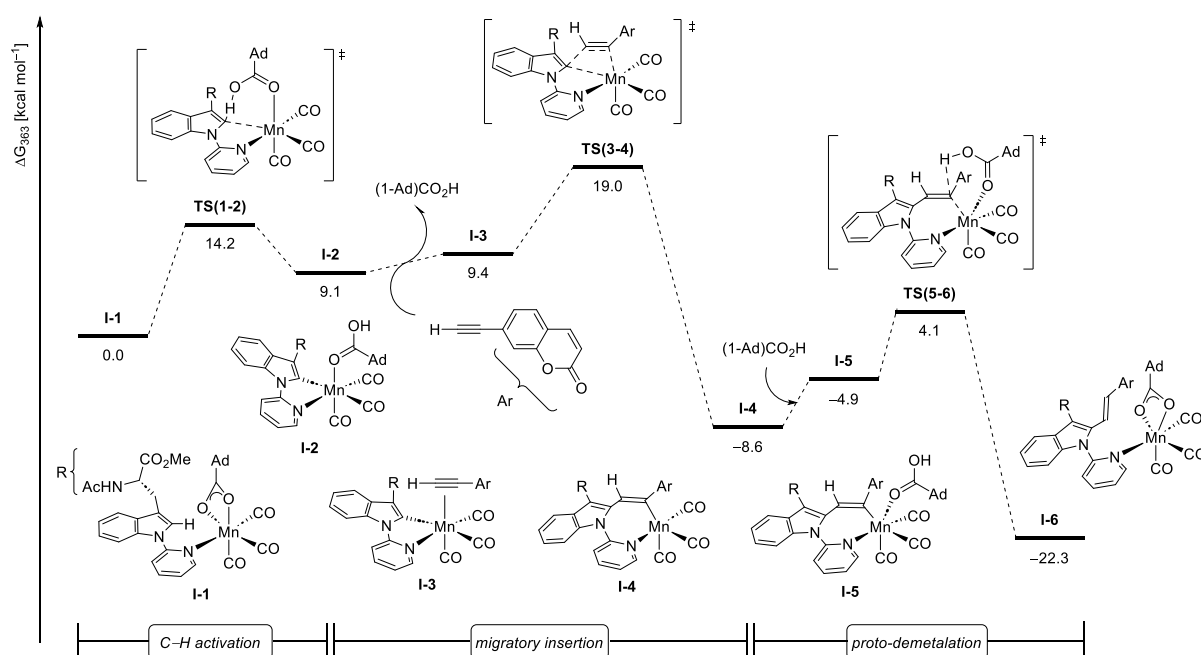

**Figure S1.** Computed Gibbs free energies ( $\Delta G_{363}$ ) in kcal·mol<sup>-1</sup> between the C-H activation and proto-demetalation elementary steps at the PW6B95-D4/def2-TZVP+SMD(1,4-dioxane)//TPSS-D3(BJ)/def2-SVP level of theory.

### Cartesian Coordinates and Energies

#### (1-Ad)CO<sub>2</sub>H

E[(PW6B95-D4/def2-TZVP+SMD(1,4-dioxane))]

= -580.273221 E<sub>h</sub>

Total Gibbs Free Energy = -580.106185 E<sub>h</sub>

Lowest frequency = 36.370 cm<sup>-1</sup>

Charge = 0, Multiplicity = 1

29

C 0.242656 -0.690697 1.262500

H 0.604330 -0.171242 2.169678

H 0.668974 -1.709214 1.271252  
 C 0.741843 0.068183 -0.000056  
 C -1.298093 -0.747457 1.260150  
 H -1.638195 -1.284354 2.164932  
 C -1.868690 0.685629 1.259634  
 H -1.541116 1.224569 2.168688  
 H -2.974369 0.652424 1.280240  
 C 0.156419 1.496820 -0.000611  
 H 0.524373 2.043885 -0.886901  
 H 0.524432 2.044583 0.885216  
 C -1.383688 1.432070 -0.000557  
 H -1.788368 2.460738 -0.000955  
 C -1.868731 0.684641 -1.260143  
 H -2.974411 0.651421 -1.280692  
 H -1.541183 1.222856 -2.169636  
 C 0.242612 -0.691712 -1.261974  
 H 0.668910 -1.710244 -1.269910  
 H 0.604267 -0.173012 -2.169594  
 C -1.781453 -1.495843 0.000608  
 H -1.390639 -2.530911 0.001007  
 H -2.885672 -1.562905 0.000658  
 C -1.298138 -0.748447 -1.259541  
 H -1.638274 -1.286065 -2.163883  
 C 2.261682 0.133883 -0.000041  
 O 2.827888 -1.106722 -0.000011  
 H 3.796237 -0.953790 0.000065  
 O 2.934887 1.146576 0.000014

**alkyne**

E[(PW6B95-D4/def2-TZVP+SMD(1,4-dioxane))]

= -574.133008 E<sub>h</sub>

Total Gibbs Free Energy = -574.069466 E<sub>h</sub>

Lowest frequency = 80.730 cm<sup>-1</sup>

Charge = 0, Multiplicity = 1

C -4.062851 -1.175797 -0.006714  
 C -4.016355 1.267874 -0.012569  
 C -3.297185 0.044593 -0.006153  
 C -1.883040 0.096639 0.000355  
 H -1.320501 -0.842988 0.005330  
 C -1.212127 1.313295 0.000480  
 C -1.944640 2.533733 -0.005991  
 C -3.354318 2.500981 -0.012526  
 H -3.529853 -2.133465 -0.001832  
 H -0.119789 1.348774 0.005519  
 H -3.940226 3.422600 -0.017566  
 O -5.378324 1.288276 -0.019010  
 C -6.169129 0.116393 -0.019810  
 O -7.370489 0.251472 -0.025782  
 C -5.425732 -1.141384 -0.013196  
 H -6.035652 -2.048112 -0.013804  
 C -1.254874 3.784902 -0.005863  
 C -0.658894 4.850766 -0.005714  
 H -0.136903 5.791261 -0.005600

**Int1**

E[(PW6B95-D4/def2-TZVP+SMD(1,4-dioxane))]

= -3199.299899 E<sub>h</sub>

Total Gibbs Free Energy = -3198.889640 E<sub>h</sub>

Lowest frequency = 15.080 cm<sup>-1</sup>

Charge = 0, Multiplicity = 1

79

C 0.750694 -4.573352 -1.419440  
 C 0.389928 -3.635253 -0.454026  
 C 1.785601 -2.016668 -1.381706  
 C 2.209482 -2.912902 -2.380909  
 C 1.700055 -4.210910 -2.387982  
 H 0.299129 -5.568700 -1.403189  
 H -0.342410 -3.858239 0.327264  
 H 2.891886 -2.558226 -3.156774

|    |           |           |           |   |           |           |           |
|----|-----------|-----------|-----------|---|-----------|-----------|-----------|
| H  | 2.011078  | -4.919739 | -3.161856 | O | 0.605712  | 4.339528  | 1.974559  |
| C  | 3.478101  | -0.152743 | -1.602545 | N | -0.781392 | 3.987393  | -0.262740 |
| C  | 1.968442  | 1.583165  | -1.278904 | H | -0.783125 | 4.789527  | 0.371096  |
| N  | 2.191905  | -0.678876 | -1.406396 | C | -1.833833 | 3.716425  | -1.086726 |
| Mn | 0.690384  | -1.421047 | 1.541975  | C | -2.939169 | 4.760966  | -1.119363 |
| C  | 2.303904  | -0.635479 | 1.467612  | H | -3.830500 | 4.343629  | -0.618583 |
| O  | 3.372616  | -0.175272 | 1.495072  | H | -2.660896 | 5.705706  | -0.624283 |
| O  | 1.872211  | -3.790558 | 2.844223  | H | -3.211188 | 4.958423  | -2.168400 |
| C  | 3.362900  | 1.270259  | -1.516112 | O | -1.890708 | 2.676783  | -1.753270 |
| C  | 4.527449  | 2.054213  | -1.636625 | C | -4.010009 | -1.958468 | 0.543141  |
| C  | 5.758069  | 1.418145  | -1.824363 | H | -4.119167 | -2.019831 | 1.641210  |
| H  | 4.468871  | 3.145864  | -1.574464 | H | -3.576175 | -2.918406 | 0.210228  |
| C  | 4.711551  | -0.797377 | -1.763573 | C | -3.050440 | -0.804841 | 0.181990  |
| C  | 5.849782  | 0.009438  | -1.881765 | C | -5.379075 | -1.722864 | -0.126260 |
| H  | 6.669303  | 2.017923  | -1.918460 | H | -6.060406 | -2.550818 | 0.143648  |
| H  | 4.792980  | -1.887964 | -1.780990 | C | -5.972007 | -0.384399 | 0.363400  |
| H  | 6.828673  | -0.462978 | -2.012944 | H | -6.119911 | -0.415552 | 1.459749  |
| N  | 0.923460  | -2.389197 | -0.398989 | H | -6.965302 | -0.220512 | -0.095722 |
| O  | 0.203478  | -0.060475 | 4.118708  | C | -3.650084 | 0.545607  | 0.660428  |
| C  | 0.390533  | -0.620308 | 3.118070  | H | -2.951865 | 1.357611  | 0.399460  |
| C  | 1.424465  | -2.847181 | 2.329508  | H | -3.759419 | 0.530699  | 1.761280  |
| O  | -0.795188 | -0.082337 | 0.695891  | C | -5.019345 | 0.769606  | -0.011859 |
| O  | -1.334382 | -2.096375 | 1.362844  | H | -5.439143 | 1.729567  | 0.343640  |
| C  | 1.299998  | 0.385588  | -1.220527 | C | -4.839433 | 0.818760  | -1.543973 |
| H  | 0.243127  | 0.181684  | -1.068995 | H | -5.816001 | 1.001205  | -2.031810 |
| C  | 1.304671  | 2.927504  | -1.167656 | H | -4.158032 | 1.642250  | -1.821699 |
| H  | 0.746888  | 3.139330  | -2.096530 | C | -2.876242 | -0.735306 | -1.365921 |
| H  | 2.051964  | 3.731144  | -1.048093 | H | -2.414027 | -1.674872 | -1.725363 |
| C  | 0.251501  | 2.995724  | -0.015750 | H | -2.203314 | 0.102726  | -1.615799 |
| H  | -0.226333 | 2.003499  | 0.077570  | C | -5.199102 | -1.677719 | -1.658173 |
| C  | 2.459065  | 2.671052  | 2.954774  | H | -4.788133 | -2.640435 | -2.018400 |
| H  | 3.282546  | 1.946648  | 2.985023  | H | -6.179542 | -1.536619 | -2.151273 |
| H  | 2.830839  | 3.706798  | 2.995195  | C | -4.249817 | -0.521214 | -2.031182 |
| H  | 1.756414  | 2.498481  | 3.786037  | H | -4.111884 | -0.487209 | -3.127630 |
| O  | 1.790194  | 2.430189  | 1.697644  | C | -1.679828 | -1.004327 | 0.790554  |
| C  | 0.881226  | 3.342598  | 1.326198  |   |           |           |           |

**TS(1-2)**

E[(PW6B95-D4/def2-TZVP+SMD(1,4-dioxane))]

= -3199.270444 E<sub>h</sub>Total Gibbs Free Energy = -3198.866987 E<sub>h</sub>Lowest frequency = -1125.970 cm<sup>-1</sup>

Charge = 0, Multiplicity = 1

|    |  |  |  |   |           |           |           |
|----|--|--|--|---|-----------|-----------|-----------|
| 79 |  |  |  | C | -0.341739 | -3.361611 | 2.236119  |
|    |  |  |  | O | -0.810735 | 0.240997  | -0.635247 |
|    |  |  |  | O | -1.491381 | -1.617822 | 0.431564  |
|    |  |  |  | C | 1.522236  | -0.373719 | 0.387179  |
|    |  |  |  | H | 0.276170  | -0.131040 | -0.112278 |
|    |  |  |  | C | 1.503660  | 1.960562  | 1.427741  |
|    |  |  |  | H | 2.230556  | 2.554901  | 2.009516  |
|    |  |  |  | H | 0.727129  | 1.599706  | 2.118634  |
|    |  |  |  | C | 0.812524  | 2.901635  | 0.381088  |
|    |  |  |  | H | 0.126453  | 2.280583  | -0.219782 |
|    |  |  |  | C | -1.838048 | 4.385583  | 2.504117  |
|    |  |  |  | H | -2.639841 | 3.783714  | 2.952395  |
|    |  |  |  | H | -1.219051 | 4.858768  | 3.283646  |
|    |  |  |  | H | -2.252642 | 5.168638  | 1.848535  |
|    |  |  |  | O | -1.046819 | 3.459024  | 1.733612  |
|    |  |  |  | C | 0.020725  | 3.983942  | 1.097670  |
|    |  |  |  | O | 0.321919  | 5.163883  | 1.130372  |
|    |  |  |  | N | 1.752033  | 3.535809  | -0.520250 |
|    |  |  |  | H | 2.041890  | 4.482401  | -0.272033 |
|    |  |  |  | C | 2.012389  | 3.024599  | -1.770781 |
|    |  |  |  | C | 3.002080  | 3.829664  | -2.599489 |
|    |  |  |  | H | 3.987657  | 3.336272  | -2.528253 |
|    |  |  |  | H | 2.685658  | 3.805127  | -3.653523 |
|    |  |  |  | H | 3.104632  | 4.874957  | -2.262683 |
|    |  |  |  | O | 1.525216  | 1.967596  | -2.164466 |
|    |  |  |  | C | -3.224366 | 0.357261  | -2.078214 |
|    |  |  |  | H | -2.857714 | -0.377220 | -2.819608 |
|    |  |  |  | H | -2.554658 | 1.232515  | -2.130993 |
|    |  |  |  | C | -3.151126 | -0.261050 | -0.661498 |
|    |  |  |  | C | -4.679497 | 0.755064  | -2.396385 |
|    |  |  |  | H | -4.721779 | 1.189290  | -3.412240 |
|    |  |  |  | C | -5.583707 | -0.493327 | -2.326589 |
|    |  |  |  | H | -5.255093 | -1.240440 | -3.073819 |
|    |  |  |  | H | -6.627126 | -0.221163 | -2.574885 |
|    |  |  |  | C | -4.065011 | -1.503051 | -0.584981 |
|    |  |  |  | H | -3.995802 | -1.947752 | 0.422531  |

H -3.708899 -2.267336 -1.300679  
 C -5.517828 -1.099844 -0.909348  
 H -6.162483 -1.996600 -0.858350  
 C -6.003516 -0.056418 0.118553  
 H -7.053458 0.222715 -0.090973  
 H -5.976128 -0.487123 1.137212  
 C -3.648281 0.795655 0.373201  
 H -2.983200 1.677124 0.342480  
 H -3.580560 0.366829 1.390371  
 C -5.163131 1.798902 -1.367956  
 H -4.528795 2.703877 -1.420782  
 H -6.198822 2.110412 -1.601396  
 C -5.101318 1.192979 0.049469  
 H -5.442483 1.940648 0.789870  
 C -1.715223 -0.591305 -0.273724

**Int2**

E[(PW6B95-D4/def2-TZVP+SMD(1,4-dioxane)]

= -3199.284875 E<sub>h</sub>

Total Gibbs Free Energy = -3198.879973 E<sub>h</sub>

Lowest frequency = 9.610 cm<sup>-1</sup>

Charge = 0, Multiplicity = 1

79

C 1.942313 2.470080 3.616732  
 C 1.310762 1.258842 3.338994  
 C 0.340605 2.101918 1.383586  
 C 0.978846 3.344997 1.579072  
 C 1.778843 3.525514 2.706216  
 H 2.556328 2.572472 4.514929  
 H 1.427004 0.396346 3.999856  
 H 0.871620 4.138404 0.841890  
 H 2.280743 4.485014 2.866590  
 C -1.086451 2.611837 -0.652501  
 C -1.701262 0.391230 -0.974055  
 N -0.483628 1.791685 0.318731

Mn -0.178597 -0.792386 1.623013  
 C -1.792685 -0.638594 2.355023  
 O -2.851456 -0.504144 2.819647  
 O 0.863738 -2.282660 3.996261  
 C -1.845971 1.739539 -1.489662  
 C -2.587060 2.268767 -2.562746  
 C -2.574681 3.651477 -2.781523  
 H -3.186491 1.610904 -3.199273  
 C -1.092635 4.000305 -0.858474  
 C -1.841401 4.504712 -1.933340  
 H -3.148876 4.076608 -3.611127  
 H -0.562462 4.696358 -0.207170  
 H -1.856186 5.585665 -2.106895  
 N 0.531015 1.065756 2.253437  
 O -0.741514 -3.350934 0.237318  
 C -0.572869 -2.340658 0.788152  
 C 0.483642 -1.699147 3.062988  
 O 1.348675 -0.471380 -1.413283  
 O 1.859530 -0.819058 0.758142  
 C -0.867866 0.420118 0.138946  
 H 0.429184 -0.325624 -1.011829  
 C -2.476219 -0.788197 -1.481297  
 H -1.913462 -1.726311 -1.363668  
 H -2.702885 -0.669885 -2.555802  
 C -3.833918 -0.993358 -0.726989  
 H -3.616916 -1.263219 0.317177  
 C -4.984751 2.411705 0.187148  
 H -4.735229 2.886468 1.145389  
 H -4.566943 2.989669 -0.653728  
 H -6.074778 2.312650 0.063084  
 O -4.366303 1.109644 0.231864  
 C -4.665567 0.279633 -0.780709  
 O -5.473014 0.527948 -1.661798  
 N -4.607518 -2.069789 -1.311934  
 H -5.246783 -1.810698 -2.063709  
 C -4.626186 -3.325214 -0.753049

C -5.531392 -4.332023 -1.451641  
 H -6.126568 -3.895091 -2.270690  
 H -4.906417 -5.147245 -1.854262  
 H -6.207490 -4.776300 -0.702823  
 O -3.948321 -3.616771 0.228774  
 C 4.564565 -1.052447 0.354041  
 H 4.290895 -2.056849 0.723684  
 H 4.387155 -0.347328 1.185228  
 C 3.659456 -0.677491 -0.839175  
 C 6.041929 -1.017512 -0.084361  
 H 6.679082 -1.290491 0.776379  
 C 6.264216 -2.022862 -1.233379  
 H 6.025160 -3.047485 -0.891851  
 H 7.327129 -2.020506 -1.539512  
 C 3.888883 -1.680219 -2.003732  
 H 3.231563 -1.416789 -2.850412  
 H 3.611042 -2.697719 -1.671729  
 C 5.369650 -1.642183 -2.431098  
 H 5.521714 -2.363308 -3.254808  
 C 5.728334 -0.221084 -2.913039  
 H 6.782762 -0.189196 -3.245318  
 H 5.102612 0.054210 -3.782693  
 C 4.028448 0.753674 -1.333335  
 H 3.849590 1.479060 -0.517170  
 H 3.370090 1.030170 -2.175570  
 C 6.402359 0.403525 -0.565393  
 H 6.262342 1.129202 0.258104  
 H 7.467459 0.446174 -0.860661  
 C 5.508200 0.784039 -1.763415  
 H 5.758275 1.804413 -2.107718  
 C 2.202346 -0.673390 -0.425699

**Int3**

E[(PW6B95-D4/def2-TZVP+SMD(1,4-dioxane))]

= -3193.135189 E<sub>h</sub>

Total Gibbs Free Energy = -3192.838002 E<sub>h</sub>

Lowest frequency = 5.430 cm<sup>-1</sup>

Charge = 0, Multiplicity = 1

69

C -3.448619 -0.806340 0.991760  
 H -4.541305 -0.708070 1.117553  
 H -3.050581 -1.182036 1.946676  
 C -3.167159 -1.889465 -0.095047  
 H -2.167205 -2.323726 0.056805  
 C -4.716455 -4.972829 1.257086  
 H -4.270285 -5.552901 2.076325  
 H -5.709772 -4.588229 1.542434  
 H -4.818984 -5.590827 0.350160  
 O -3.807372 -3.883213 1.011778  
 C -4.183802 -3.026429 0.039566  
 O -5.218518 -3.115030 -0.590962  
 N -3.219434 -1.321716 -1.431541  
 H -3.798071 -0.494162 -1.577163  
 C -2.911163 -2.122422 -2.512052  
 C -3.231136 -1.524726 -3.873224  
 H -3.295217 -0.423801 -3.852413  
 H -2.462061 -1.844194 -4.592703  
 H -4.202350 -1.927275 -4.212291  
 O -2.409933 -3.232887 -2.361904  
 C 2.293735 3.975480 0.371644  
 C 1.983019 2.696764 0.827969  
 C -0.259693 2.902164 0.184584  
 C -0.020680 4.211149 -0.287594  
 C 1.263390 4.743170 -0.192973  
 H 3.314255 4.354570 0.465024  
 H 2.746686 2.061155 1.282136  
 H -0.831920 4.803015 -0.704045  
 H 1.455586 5.758727 -0.553130  
 C -2.730699 2.637120 -0.365529  
 C -2.875359 0.533637 0.632098  
 N -1.477322 2.253577 0.158445

Mn 0.230099 0.266215 1.389396  
C -0.298240 -1.396714 1.835462  
O -0.602572 -2.477417 2.136706  
C -0.425371 0.937633 2.931990  
O -0.876652 1.376568 3.905666  
C 1.867364 -0.055611 2.120385  
O 2.892135 -0.251866 2.634721  
C -1.565659 0.953798 0.748358  
C -3.622863 1.561185 -0.067596  
C -4.965253 1.629661 -0.490399  
C -5.400330 2.755870 -1.199866  
H -5.659642 0.811995 -0.267262  
C -3.168218 3.762458 -1.078513  
C -4.510343 3.807155 -1.489674  
H -6.441131 2.820524 -1.533320  
H -2.511691 4.592711 -1.340113  
H -4.863020 4.679025 -2.049721  
N 0.744772 2.162489 0.741595  
C 0.022842 -0.384571 -0.663840  
H -0.913974 -0.600256 -1.166974  
C 1.269165 -0.328679 -0.544138  
C 2.675574 -0.258215 -0.821368  
C 3.171656 0.830860 -1.592598  
C 4.530667 0.928773 -1.867035  
H 2.469746 1.580634 -1.965436  
H 4.913513 1.764489 -2.462490  
C 4.931249 -1.126505 -0.626006  
C 5.440896 -0.042726 -1.389137  
C 3.566576 -1.237054 -0.339129  
H 3.213591 -2.081717 0.255806  
O 5.752448 -2.097996 -0.141911  
C 7.150598 -2.105632 -0.353100  
O 7.784482 -3.017694 0.123178  
C 7.672124 -0.988222 -1.137427  
C 6.860974 -0.009510 -1.629601  
H 8.752421 -0.993305 -1.302000

H 7.277938 0.816747 -2.216756

### TS(3-4)

E[(PW6B95-D4/def2-TZVP+SMD(1,4-dioxane))]

= -3193.121100 E<sub>h</sub>

Total Gibbs Free Energy = -3192.822654 E<sub>h</sub>

Lowest frequency = -283.260 cm<sup>-1</sup>

Charge = 0, Multiplicity = 1

69

C -3.356936 -0.855611 0.786821  
H -4.459708 -0.808116 0.766675  
H -3.066160 -1.100358 1.821061  
C -2.900976 -2.030759 -0.121277  
H -1.869481 -2.325884 0.128278  
C -4.157337 -5.089349 1.552631  
H -3.684856 -5.509417 2.450791  
H -5.199089 -4.791752 1.757535  
H -4.148426 -5.819370 0.726943  
O -3.366560 -3.937890 1.200328  
C -3.794729 -3.250549 0.122809  
O -4.786782 -3.525535 -0.522148  
N -2.946906 -1.635317 -1.519053  
H -3.597353 -0.894031 -1.779701  
C -2.541357 -2.540130 -2.483054  
C -2.869096 -2.153982 -3.915914  
H -2.954595 -1.062833 -4.053195  
H -2.091371 -2.558162 -4.580761  
H -3.832539 -2.618720 -4.192533  
O -1.957342 -3.573602 -2.175086  
C 2.274169 4.056146 0.144406  
C 1.911004 2.912444 0.851873  
C -0.222040 2.893467 -0.098193  
C 0.086274 4.024900 -0.881205  
C 1.342816 4.612248 -0.746612  
H 3.270631 4.484297 0.277659



|    |           |           |           |
|----|-----------|-----------|-----------|
| H  | 2.614116  | 2.421061  | 1.528435  |
| H  | -0.636433 | 4.407221  | -1.600610 |
| H  | 1.599545  | 5.490527  | -1.347064 |
| C  | -2.691111 | 2.591236  | -0.602296 |
| C  | -2.806652 | 0.472165  | 0.355234  |
| N  | -1.424159 | 2.214289  | -0.133279 |
| Mn | 0.159838  | 0.496864  | 1.590800  |
| C  | -0.323298 | -1.126088 | 2.196689  |
| O  | -0.618671 | -2.174739 | 2.604120  |
| C  | -0.735897 | 1.316456  | 2.937654  |
| O  | -1.339294 | 1.854522  | 3.769670  |
| C  | 1.708983  | 0.373035  | 2.522307  |
| O  | 2.697213  | 0.293656  | 3.130604  |
| C  | -1.484329 | 0.909453  | 0.451193  |
| C  | -3.567519 | 1.496947  | -0.310817 |
| C  | -4.930444 | 1.588534  | -0.670250 |
| C  | -5.394531 | 2.753002  | -1.288151 |
| H  | -5.617269 | 0.762891  | -0.455275 |
| C  | -3.165788 | 3.772132  | -1.191885 |
| C  | -4.524204 | 3.835351  | -1.535544 |
| H  | -6.448954 | 2.834422  | -1.571183 |
| H  | -2.525577 | 4.637171  | -1.371175 |
| H  | -4.912376 | 4.747786  | -1.999028 |
| N  | 0.692533  | 2.338432  | 0.744464  |
| C  | -0.157890 | -0.194490 | -0.451718 |
| H  | -0.860598 | -0.722125 | -1.097127 |
| C  | 1.101296  | -0.114800 | -0.182642 |
| C  | 2.445062  | -0.239089 | -0.668280 |
| C  | 2.780858  | 0.373219  | -1.913254 |
| C  | 4.074424  | 0.292332  | -2.410364 |
| H  | 2.003594  | 0.911606  | -2.462484 |
| H  | 4.328008  | 0.765081  | -3.365531 |
| C  | 4.740594  | -1.007491 | -0.465121 |
| C  | 5.086088  | -0.400682 | -1.702606 |
| C  | 3.446141  | -0.921329 | 0.055369  |
| H  | 3.230483  | -1.397700 | 1.013186  |

|   |          |           |           |
|---|----------|-----------|-----------|
| O | 5.665152 | -1.690275 | 0.266654  |
| C | 7.012136 | -1.844794 | -0.135901 |
| O | 7.745750 | -2.469475 | 0.595516  |
| C | 7.361799 | -1.220017 | -1.407779 |
| C | 6.445868 | -0.533237 | -2.151071 |
| H | 8.401469 | -1.340412 | -1.721812 |
| H | 6.734732 | -0.073931 | -3.103592 |

#### Int4

E[(PW6B95-D4/def2-TZVP+SMD(1,4-dioxane))]

= -3193.167416 E<sub>h</sub>

Total Gibbs Free Energy = -3192.866623 E<sub>h</sub>

Lowest frequency = 10.850 cm<sup>-1</sup>

Charge = 0, Multiplicity = 1

69

|   |           |          |           |
|---|-----------|----------|-----------|
| C | 1.837626  | 1.940642 | 0.677883  |
| H | 2.356292  | 2.219050 | 1.611352  |
| H | 0.767910  | 2.163369 | 0.801764  |
| C | 2.365131  | 2.832518 | -0.495990 |
| H | 1.715714  | 2.645094 | -1.368649 |
| C | 0.824474  | 6.038656 | 0.551024  |
| H | -0.260313 | 6.162117 | 0.666596  |
| H | 1.342616  | 6.188180 | 1.512001  |
| H | 1.225616  | 6.748327 | -0.190460 |
| O | 1.011324  | 4.682576 | 0.091751  |
| C | 2.286131  | 4.299083 | -0.093627 |
| O | 3.254303  | 5.016962 | 0.084048  |
| N | 3.728642  | 2.539160 | -0.880353 |
| H | 4.446906  | 3.159111 | -0.503978 |
| C | 4.016011  | 1.623212 | -1.861672 |
| C | 5.495644  | 1.395892 | -2.120319 |
| H | 6.121341  | 2.257085 | -1.832077 |
| H | 5.815094  | 0.518227 | -1.529971 |
| H | 5.641017  | 1.164669 | -3.186160 |
| O | 3.134647  | 0.991206 | -2.445528 |

C -0.548375 -4.801685 -1.271685  
C -0.814284 -3.784568 -0.351624  
C 1.114444 -2.647155 -0.968919  
C 1.446088 -3.613467 -1.924118  
C 0.603222 -4.720860 -2.067707  
H -1.242926 -5.641497 -1.359714  
H -1.704320 -3.809702 0.282333  
H 2.332193 -3.470028 -2.546847  
H 0.830805 -5.497373 -2.804316  
C 3.145482 -1.489241 -0.111737  
C 2.051948 0.493042 0.372425  
N 1.893344 -1.501191 -0.731103  
Mn -0.248606 -1.156741 1.184223  
C -0.503868 0.302269 2.188954  
O -0.701188 1.255066 2.832197  
C 0.938189 -1.918673 2.356215  
O 1.691630 -2.383225 3.110788  
C -1.701728 -1.896668 1.876498  
O -2.673251 -2.380641 2.308734  
C 1.209599 -0.294185 -0.419202  
C 3.275133 -0.246467 0.574221  
C 4.463712 0.034391 1.278964  
C 5.474607 -0.927654 1.301485  
H 4.586968 0.988603 1.800262  
C 4.140781 -2.475972 -0.060728  
C 5.308408 -2.171282 0.645889  
H 6.404710 -0.727999 1.842858  
H 4.016473 -3.441897 -0.557568  
H 6.111702 -2.913659 0.693836  
N 0.010295 -2.728468 -0.179333  
C -0.051596 0.093478 -1.112648  
H 0.007146 0.616368 -2.082713  
C -1.150462 -0.224954 -0.388565  
C -2.538652 0.008303 -0.784221  
C -2.940464 -0.135457 -2.143593  
C -4.261088 0.074002 -2.521686

H -2.193284 -0.431123 -2.886270  
H -4.565113 -0.045843 -3.567637  
C -4.832456 0.586624 -0.214242  
C -5.238663 0.444758 -1.567027  
C -3.508725 0.357543 0.175788  
H -3.241802 0.466834 1.229464  
O -5.723415 0.943647 0.755976  
C -7.087880 1.193274 0.498925  
O -7.787353 1.509501 1.435361  
C -7.503558 1.038904 -0.892294  
C -6.624217 0.683138 -1.873048  
H -8.560995 1.229214 -1.091916  
H -6.961827 0.575513 -2.910562

#### Int5

E[(PW6B95-D4/def2-TZVP+SMD(1,4-dioxane))]  
= -3773.470295 E<sub>h</sub>

Total Gibbs Free Energy = -3772.966993 E<sub>h</sub>

Lowest frequency = 12.850 cm<sup>-1</sup>

Charge = 0, Multiplicity = 1

98

C 1.407647 -2.114980 4.991092  
C 1.771263 -2.164662 3.648542  
C -0.117626 -0.999468 2.983227  
C -0.544976 -0.896043 4.323582  
C 0.215189 -1.466059 5.340939  
H 2.054470 -2.578162 5.740850  
H 2.695220 -2.662206 3.348133  
H -1.466962 -0.348988 4.534511  
H -0.103388 -1.387412 6.384957  
C -2.318816 -0.548759 1.963262  
C -1.696559 1.154426 0.529449  
N -0.925082 -0.418220 1.991103  
Mn 1.776522 -1.946932 0.644915  
C 1.570753 -3.751610 0.910256

|   |           |           |           |   |           |           |           |
|---|-----------|-----------|-----------|---|-----------|-----------|-----------|
| O | 1.462378  | -4.894642 | 1.085119  | H | -2.659954 | 2.187240  | -1.086466 |
| O | 4.579269  | -1.962782 | 1.547010  | H | -0.893307 | 2.233393  | -1.159363 |
| C | -0.546479 | 0.615248  | 1.100185  | C | -1.773526 | 3.667024  | 0.202456  |
| C | -2.824409 | 0.424182  | 1.051043  | H | -0.790903 | 3.860107  | 0.669888  |
| C | -4.210981 | 0.461169  | 0.780580  | C | -1.967197 | 4.753301  | -0.866477 |
| C | -5.046418 | -0.454704 | 1.426430  | O | -1.741045 | 4.589995  | -2.047534 |
| H | -4.617899 | 1.193742  | 0.076625  | O | -2.341619 | 5.930127  | -0.319667 |
| C | -3.153158 | -1.477897 | 2.603464  | C | -2.600699 | 6.979928  | -1.270467 |
| C | -4.524076 | -1.414023 | 2.325778  | H | -1.713657 | 7.159653  | -1.899798 |
| H | -6.122332 | -0.440705 | 1.223913  | H | -3.449346 | 6.697439  | -1.914821 |
| H | -2.750129 | -2.243164 | 3.272962  | H | -2.845687 | 7.868670  | -0.672583 |
| H | -5.199753 | -2.131726 | 2.801920  | N | -2.760564 | 3.777826  | 1.267968  |
| N | 1.030096  | -1.632586 | 2.641171  | H | -2.447054 | 3.740311  | 2.233775  |
| C | 0.832387  | 0.985550  | 0.818375  | C | -4.097856 | 3.800748  | 0.982362  |
| H | 0.987201  | 2.071644  | 0.704181  | O | -4.500816 | 3.795898  | -0.183140 |
| C | 1.881324  | 0.143179  | 0.543534  | C | -2.787370 | -2.757557 | -0.964543 |
| C | 3.186352  | 0.809532  | 0.317538  | H | -3.134054 | -2.112616 | -0.140007 |
| C | 3.693768  | 1.703883  | 1.301738  | H | -2.210094 | -3.582855 | -0.512778 |
| C | 4.927243  | 2.326153  | 1.140050  | C | -1.870902 | -1.944299 | -1.905470 |
| H | 3.104061  | 1.875080  | 2.207586  | C | -3.990664 | -3.301817 | -1.757842 |
| H | 5.312712  | 3.002048  | 1.911601  | H | -4.641170 | -3.872717 | -1.070349 |
| O | 2.729876  | -2.477999 | -2.103429 | C | -4.782962 | -2.124559 | -2.363273 |
| C | 2.358394  | -2.237284 | -1.025252 | H | -5.153190 | -1.466647 | -1.555399 |
| C | 3.465622  | -1.956889 | 1.200318  | H | -5.665593 | -2.503134 | -2.912467 |
| C | 3.964188  | 0.565727  | -0.830837 | C | -2.666411 | -0.771273 | -2.530666 |
| H | 3.627156  | -0.112252 | -1.617527 | H | -2.007531 | -0.182425 | -3.191289 |
| C | 5.194616  | 1.209191  | -0.998458 | H | -3.015482 | -0.102460 | -1.726154 |
| C | 5.707246  | 2.096819  | -0.016490 | C | -3.870082 | -1.326524 | -3.316787 |
| O | 5.889229  | 0.946712  | -2.143083 | H | -4.432245 | -0.479281 | -3.749749 |
| C | 7.146539  | 1.518411  | -2.432863 | C | -3.367079 | -2.248141 | -4.446644 |
| O | 7.672051  | 1.216912  | -3.480959 | H | -4.223039 | -2.633538 | -5.031645 |
| C | 6.990513  | 2.697379  | -0.268024 | H | -2.724186 | -1.678291 | -5.143401 |
| C | 7.674973  | 2.423165  | -1.415720 | C | -1.365759 | -2.877644 | -3.053853 |
| H | 7.409022  | 3.381467  | 0.479517  | H | -0.779740 | -3.707552 | -2.617941 |
| H | 8.650130  | 2.863448  | -1.637959 | H | -0.693904 | -2.308368 | -3.720535 |
| C | -1.751408 | 2.270941  | -0.470127 | C | -3.489132 | -4.225067 | -2.886983 |

H -2.933765 -5.080791 -2.458849  
H -4.346431 -4.639512 -3.449927  
C -2.575646 -3.423850 -3.837333  
H -2.204094 -4.082530 -4.643641  
C -0.638832 -1.468450 -1.173667  
O -0.249189 -2.003323 -0.119721  
O 0.044673 -0.506866 -1.776511  
H 0.790131 -0.249248 -1.155603  
C -5.033497 3.788211 2.179430  
H -5.936076 4.364855 1.927917  
H -5.335532 2.744182 2.378133  
H -4.569214 4.199553 3.091423

**TS(5-6)**

E[(PW6B95-D4/def2-TZVP+SMD(1,4-dioxane)]

= -3773.452028 E<sub>h</sub>

Total Gibbs Free Energy = -3772.952631 E<sub>h</sub>

Lowest frequency = -1108.780 cm<sup>-1</sup>

Charge = 0, Multiplicity = 1

98

C 1.071882 -2.300138 5.051909  
C 1.571998 -2.214007 3.756680  
C -0.341442 -1.175459 2.970038  
C -0.913409 -1.217852 4.259459  
C -0.210565 -1.796087 5.311990  
H 1.683103 -2.755976 5.835250  
H 2.566858 -2.600482 3.527967  
H -1.899544 -0.770859 4.405945  
H -0.641265 -1.830262 6.317468  
C -2.451989 -0.768669 1.756098  
C -1.807661 1.110000 0.571775  
N -1.081220 -0.562609 1.945238  
Mn 1.836606 -1.924948 0.774134  
C 1.889515 -3.697191 1.103734  
O 1.920153 -4.838675 1.317382

O 4.511284 -1.480105 1.956347  
C -0.693547 0.590434 1.219761  
C -2.926802 0.257354 0.887897  
C -4.275471 0.236766 0.467215  
C -5.109477 -0.780006 0.938872  
H -4.653660 1.003448 -0.216035  
C -3.284068 -1.798913 2.222424  
C -4.619908 -1.785476 1.806510  
H -6.156606 -0.811221 0.620872  
H -2.900639 -2.601486 2.858672  
H -5.292016 -2.581470 2.142618  
N 0.886883 -1.681944 2.708802  
C 0.680509 1.076713 1.125917  
H 0.823776 2.146080 1.353185  
C 1.711389 0.365718 0.571871  
C 3.020434 1.027766 0.397329  
C 3.605861 1.766512 1.460661  
C 4.847976 2.372121 1.307083  
H 3.079807 1.823155 2.418714  
H 5.301044 2.926681 2.136199  
O 3.172238 -2.434430 -1.820291  
C 2.637355 -2.203133 -0.816043  
C 3.451605 -1.644712 1.500583  
C 3.718822 0.915136 -0.820428  
H 3.302435 0.360472 -1.664649  
C 4.962171 1.537660 -0.972826  
C 5.555028 2.274192 0.086395  
O 5.586986 1.407432 -2.177600  
C 6.848213 1.975358 -2.460122  
O 7.309104 1.797799 -3.564859  
C 6.844712 2.865700 -0.155950  
C 7.459363 2.724279 -1.365161  
H 7.324717 3.433708 0.649489  
H 8.437026 3.161633 -1.582113  
C -1.826428 2.298570 -0.342385  
H -2.640118 2.199179 -1.077473

H -0.886880 2.370723 -0.912385  
C -2.042290 3.631201 0.417576  
H -1.145461 3.852662 1.024358  
C -2.179834 4.784238 -0.589201  
O -1.791699 4.731577 -1.737407  
O -2.711884 5.885560 -0.015746  
C -2.930388 6.986607 -0.917770  
H -1.987838 7.275871 -1.410812  
H -3.665912 6.697449 -1.686236  
H -3.318143 7.806581 -0.297585  
N -3.163325 3.591319 1.347285  
H -2.975096 3.515931 2.342887  
C -4.451614 3.555701 0.888882  
O -4.700279 3.610467 -0.317496  
C -2.440460 -2.908247 -1.240936  
H -2.887463 -2.334693 -0.412182  
H -1.893081 -3.755411 -0.792384  
C -1.453130 -2.010886 -2.016637  
C -3.544879 -3.410863 -2.191760  
H -4.247967 -4.045227 -1.620819  
C -4.301265 -2.204217 -2.784893  
H -4.768179 -1.618176 -1.971784  
H -5.113955 -2.554069 -3.449554  
C -2.210103 -0.808995 -2.630690  
H -1.496625 -0.163185 -3.170270  
H -2.653144 -0.206734 -1.819364  
C -3.316578 -1.317460 -3.575119  
H -3.854136 -0.448725 -3.997466  
C -2.681459 -2.139237 -4.715321  
H -3.464728 -2.491608 -5.412794  
H -1.985416 -1.505921 -5.296672  
C -0.817230 -2.841769 -3.175003  
H -0.257291 -3.694307 -2.747636  
H -0.095474 -2.209079 -3.721784  
C -2.910324 -4.234041 -3.331520  
H -2.378836 -5.110869 -2.915456

H -3.696968 -4.618455 -4.008051  
C -1.926102 -3.345381 -4.119704  
H -1.460803 -3.933002 -4.932641  
C -0.296977 -1.546804 -1.143655  
O -0.017961 -2.200316 -0.084389  
O 0.403798 -0.557026 -1.548643  
H 1.161749 -0.275157 -0.512939  
C -5.530002 3.400856 1.948099  
H -6.430966 3.937124 1.614807  
H -5.781353 2.328946 2.040429  
H -5.216996 3.774763 2.937416

### Int6

E[(PW6B95-D4/def2-TZVP+SMD(1,4-dioxane))]

= -3773.497271 E<sub>h</sub>

Total Gibbs Free Energy = -3772.994663 E<sub>h</sub>

Lowest frequency = 10.790 cm<sup>-1</sup>

Charge = 0, Multiplicity = 1

98

C 0.994504 -3.875875 -4.207280  
C 0.324659 -3.608147 -3.017583  
C 1.334862 -1.530385 -2.786749  
C 2.011837 -1.710665 -4.013168  
C 1.858282 -2.897698 -4.722018  
H 0.824488 -4.825602 -4.720772  
H -0.376992 -4.336883 -2.606376  
H 2.622294 -0.892667 -4.400254  
H 2.380724 -3.046578 -5.672017  
C 2.747003 0.314380 -1.883624  
C 1.100994 1.387066 -0.644900  
N 1.517781 -0.334804 -2.088876  
Mn -0.635796 -2.371476 -0.445460  
C -0.137559 -4.043593 -0.062023  
O 0.198560 -5.122144 0.207337  
O -3.063916 -3.328207 -1.847131

|   |           |           |           |   |           |           |           |
|---|-----------|-----------|-----------|---|-----------|-----------|-----------|
| C | 0.526937  | 0.318160  | -1.323249 | C | -0.366941 | 3.440045  | -0.639799 |
| C | 2.498478  | 1.409794  | -1.005373 | H | -1.220624 | 2.926015  | -1.118057 |
| C | 3.564887  | 2.246001  | -0.612147 | C | -0.966087 | 4.518622  | 0.274350  |
| C | 4.851183  | 1.953616  | -1.071787 | O | -1.171552 | 4.361512  | 1.459878  |
| H | 3.382472  | 3.101658  | 0.044747  | O | -1.306273 | 5.628131  | -0.415856 |
| C | 4.044006  | -0.003648 | -2.314574 | C | -1.827864 | 6.701093  | 0.390997  |
| C | 5.087927  | 0.832486  | -1.898609 | H | -2.710577 | 6.364034  | 0.958784  |
| H | 5.691636  | 2.587172  | -0.771482 | H | -1.054974 | 7.045986  | 1.097237  |
| H | 4.254351  | -0.883761 | -2.926248 | H | -2.094632 | 7.500353  | -0.314213 |
| H | 6.109804  | 0.603241  | -2.217116 | N | 0.428280  | 4.014886  | -1.716510 |
| N | 0.484718  | -2.470953 | -2.292555 | H | 0.265866  | 3.702205  | -2.669474 |
| C | -0.856863 | -0.115251 | -1.402703 | C | 1.481087  | 4.844274  | -1.437745 |
| H | -1.241420 | -0.369368 | -2.399989 | O | 1.723067  | 5.202043  | -0.283487 |
| C | -1.723037 | -0.009035 | -0.327591 | C | 3.688641  | -1.401084 | 1.191796  |
| C | -3.185997 | -0.066277 | -0.379186 | H | 3.730814  | -0.713337 | 0.330909  |
| C | -3.912850 | -0.230164 | -1.589579 | H | 3.505378  | -2.412760 | 0.789461  |
| C | -5.299342 | -0.281988 | -1.577494 | C | 2.524118  | -0.999222 | 2.119903  |
| H | -3.379405 | -0.322718 | -2.539354 | C | 5.021159  | -1.352860 | 1.967016  |
| H | -5.855812 | -0.416073 | -2.511017 | H | 5.846359  | -1.635450 | 1.286402  |
| O | -2.175641 | -2.423730 | 2.100946  | C | 5.256165  | 0.077138  | 2.496448  |
| C | -1.526364 | -2.325411 | 1.146047  | H | 5.310097  | 0.785572  | 1.648767  |
| C | -2.116451 | -2.928158 | -1.294748 | H | 6.222683  | 0.130176  | 3.033604  |
| C | -3.891568 | 0.062612  | 0.833587  | C | 2.768309  | 0.425617  | 2.670524  |
| H | -3.361772 | 0.189260  | 1.781088  | H | 1.921544  | 0.708567  | 3.318927  |
| C | -5.290349 | 0.013660  | 0.837951  | H | 2.793485  | 1.142225  | 1.830373  |
| C | -6.021076 | -0.163852 | -0.364743 | C | 4.102104  | 0.472741  | 3.441190  |
| O | -5.921537 | 0.142530  | 2.037432  | H | 4.266477  | 1.498696  | 3.820116  |
| C | -7.326590 | 0.106337  | 2.178424  | C | 4.044975  | -0.513598 | 4.625860  |
| O | -7.784003 | 0.233489  | 3.290242  | H | 4.990118  | -0.473832 | 5.200536  |
| C | -7.457394 | -0.209229 | -0.269767 | H | 3.228893  | -0.228425 | 5.316016  |
| C | -8.076685 | -0.082946 | 0.938195  | C | 2.477976  | -1.989148 | 3.321426  |
| H | -8.043778 | -0.348924 | -1.185142 | H | 2.287987  | -3.011716 | 2.943498  |
| H | -9.163624 | -0.114598 | 1.046840  | H | 1.633549  | -1.713629 | 3.978008  |
| C | 0.426721  | 2.418641  | 0.210448  | C | 4.965666  | -2.338826 | 3.152058  |
| H | 1.185469  | 2.977055  | 0.778357  | H | 4.813379  | -3.369773 | 2.779471  |
| H | -0.245389 | 1.971286  | 0.954972  | H | 5.925548  | -2.327969 | 3.703133  |

|   |           |           |           |
|---|-----------|-----------|-----------|
| C | 3.810423  | -1.942970 | 4.094468  |
| H | 3.761101  | -2.651803 | 4.942209  |
| C | 1.147066  | -1.080584 | 1.446633  |
| O | 1.100637  | -1.785314 | 0.351785  |
| O | 0.164199  | -0.547476 | 1.992943  |
| H | -1.277888 | 0.231121  | 0.645522  |
| C | 2.341908  | 5.247163  | -2.623424 |
| H | 2.701433  | 6.275191  | -2.466570 |
| H | 3.220680  | 4.578387  | -2.659882 |
| H | 1.808212  | 5.181020  | -3.58640  |

## Isomerization Studies by Light

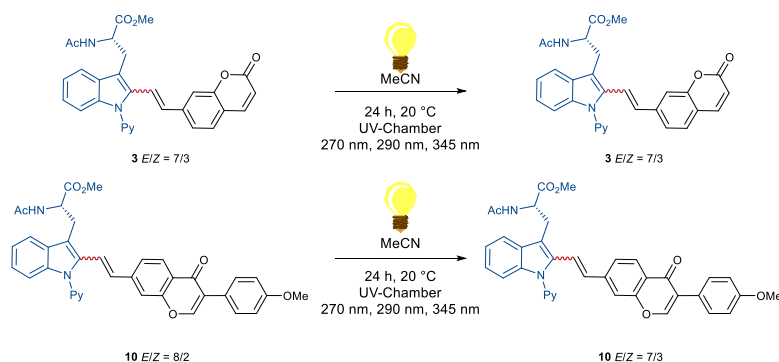

Figure S2. Isomerization of compounds 3 and 10.

Further synthetic isomerization studies were conducted with compounds 3 and 10 to evaluate the influence of UV-light on the *E/Z* ratio. Therefore, a UV-chamber with a mercury lamp was used with the wavelengths of 270 nm, 290 nm and 345 nm on a 0.05 mmol scale in dry MeCN (0.1 M). However, the excitation of the isomers led to a poorer ratio of *E*- and *Z* and decomposition.

## Isomerization Studies Thermal Conditions

For further investigation of the isomerization, the compound 3 (*E/Z*, 8/2) was treated with 40 mol% of AdCO<sub>2</sub>H, 7.5 mol% of MnBr(CO)<sub>5</sub> at 90 °C under N<sub>2</sub>-atmosphere in 1,4-dioxane. After 20 h the mixture was flushed over a short plug of celite (EA/MeOH 9/0.2) and exceeded solvent was removed under reduced pressure and the product was reisolated in 96% with the same *E/Z* ratio of 8/2.

## Removal of the Pyridyl-Directing Group

**R.P 1** According to the well-established two-step sequence<sup>[12]</sup>, a stirring solution of the amino acid (1.0 equiv) in CH<sub>2</sub>Cl<sub>2</sub> (0.25 M) was treated with MeOTf (1.0 equiv) at 0 °C. After 30-60 min, the mixture was allowed to warm up to 25 °C and stirred for 16-18 h. The crude mixture was concentrated under reduced pressure to afford a bright yellow solid. **R.P 2** For the final removal, in a sealed-tube, the crude product, Pd(OH)<sub>2</sub>/C (20 wt.%, 0.1 equiv) or Pd/C (20 wt.%, 0.1 equiv) and ammonium formate (10.0 equiv) or a H<sub>2</sub> (1 atm) saturated solution were dissolved in ethanol (0.5 M) and stirred at 50-60 °C for 16-21 h. This method resulted in fragmentation of compounds 3, 4, and 10.

Besides palladium catalyzed protocols the Raney-Nickel catalyst was investigated. The pyridyl was methylated according to the introduced procedure **R.P 1** treated and further implemented. **R.P 3** Therefore, the Raney-Nickel catalyst was activated with a NaOH (2 M) solution and dried under vacuum. The methylated amino acid (1.0 equiv) was treated with 20 mol% of the activated Raney-Nickel catalyst in MeOH (0.2 M) at 50 °C.<sup>[13]</sup> This method resulted in fragmentation of compounds 3 and 4.



## Spectrophotometer Data

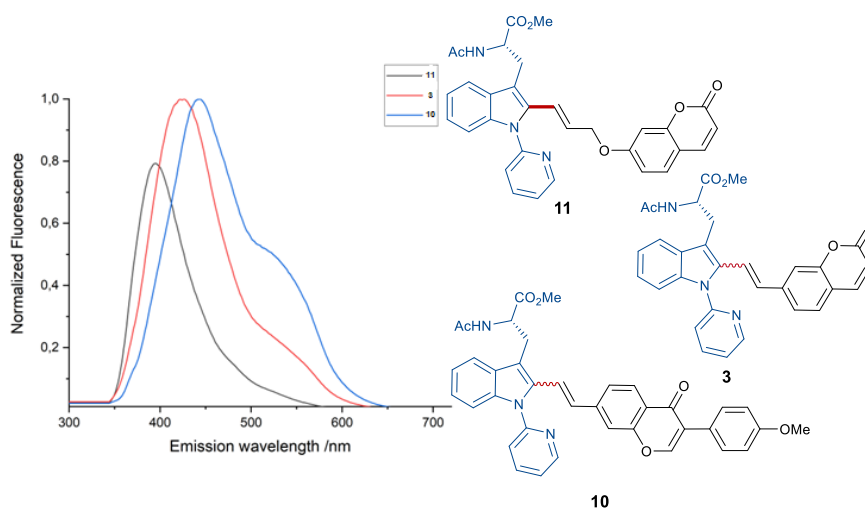

**Figure S3.** Fluorescence Studies compound **3**, **10**, **11**.

Fluorescent studies showed an emission wavelengths of  $\lambda_{em} = 426$  nm,  $\lambda_{em} = 396$  nm and  $\lambda_{em} = 443$  nm for products **3**, **10** and **11**, respectively within an excitation wavelength of  $\lambda_{exc} = 330$  nm. All here listed Data are given as raw data.

Raw Data of Compound **3**, **10**, **11**:

|     |         |         |       |         |
|-----|---------|---------|-------|---------|
| 200 | 0       | 0       | 0     | 0       |
| 201 | 0,25884 | 0,38441 | 0,515 | 0,00182 |
| 202 | 0,25884 | 0,38441 | 0,515 | 0,00364 |
| 203 | 0,25884 | 0,38441 | 0,515 | 0,00545 |
| 204 | 0,25884 | 0,38441 | 0,515 | 0,00727 |
| 205 | 0,25884 | 0,38441 | 0,515 | 0,00909 |
| 206 | 0,25884 | 0,38441 | 0,515 | 0,01091 |
| 207 | 0,25884 | 0,38441 | 0,515 | 0,01273 |
| 208 | 0,25884 | 0,38441 | 0,515 | 0,01455 |
| 209 | 0,25884 | 0,38441 | 0,515 | 0,01636 |
| 210 | 0,25884 | 0,38441 | 0,515 | 0,01818 |
| 211 | 0,25884 | 0,38441 | 0,515 | 0,02    |
| 212 | 0,25884 | 0,38441 | 0,515 | 0,02182 |
| 213 | 0,25884 | 0,38441 | 0,515 | 0,02364 |
| 214 | 0,25884 | 0,38441 | 0,515 | 0,02545 |
| 215 | 0,25884 | 0,38441 | 0,515 | 0,02727 |
| 216 | 0,25884 | 0,38441 | 0,515 | 0,02909 |
| 217 | 0,25884 | 0,38441 | 0,515 | 0,03091 |
| 218 | 0,25884 | 0,38441 | 0,515 | 0,03273 |

|     |         |         |       |         |
|-----|---------|---------|-------|---------|
| 219 | 0,25884 | 0,38441 | 0,515 | 0,03455 |
| 220 | 0,25884 | 0,38441 | 0,515 | 0,03636 |
| 221 | 0,25884 | 0,38441 | 0,515 | 0,03818 |
| 222 | 0,25884 | 0,38441 | 0,515 | 0,04    |
| 223 | 0,25884 | 0,38441 | 0,515 | 0,04182 |
| 224 | 0,25884 | 0,38441 | 0,515 | 0,04364 |
| 225 | 0,25884 | 0,38441 | 0,515 | 0,04545 |
| 226 | 0,25884 | 0,38441 | 0,515 | 0,04727 |
| 227 | 0,25884 | 0,38441 | 0,515 | 0,04909 |
| 228 | 0,25884 | 0,38441 | 0,515 | 0,05091 |
| 229 | 0,25884 | 0,38441 | 0,515 | 0,05273 |
| 230 | 0,25884 | 0,38441 | 0,515 | 0,05455 |
| 231 | 0,25884 | 0,38441 | 0,515 | 0,05636 |
| 232 | 0,25884 | 0,38441 | 0,515 | 0,05818 |
| 233 | 0,25884 | 0,38441 | 0,515 | 0,06    |
| 234 | 0,25884 | 0,38441 | 0,515 | 0,06182 |
| 235 | 0,25884 | 0,38441 | 0,515 | 0,06364 |
| 236 | 0,25884 | 0,38441 | 0,515 | 0,06545 |
| 237 | 0,25884 | 0,38441 | 0,515 | 0,06727 |
| 238 | 0,25884 | 0,38441 | 0,515 | 0,06909 |
| 239 | 0,25884 | 0,38441 | 0,515 | 0,07091 |
| 240 | 0,25884 | 0,38441 | 0,515 | 0,07273 |
| 241 | 0,25884 | 0,38441 | 0,515 | 0,07455 |
| 242 | 0,25884 | 0,38441 | 0,515 | 0,07636 |
| 243 | 0,25884 | 0,38441 | 0,515 | 0,07818 |
| 244 | 0,25884 | 0,38441 | 0,515 | 0,08    |
| 245 | 0,25884 | 0,38441 | 0,515 | 0,08182 |
| 246 | 0,25884 | 0,38441 | 0,515 | 0,08364 |
| 247 | 0,25884 | 0,38441 | 0,515 | 0,08545 |
| 248 | 0,25884 | 0,38441 | 0,515 | 0,08727 |
| 249 | 0,25884 | 0,38441 | 0,515 | 0,08909 |
| 250 | 0,25884 | 0,38441 | 0,515 | 0,09091 |
| 251 | 0,25884 | 0,38441 | 0,515 | 0,09273 |
| 252 | 0,25884 | 0,38441 | 0,515 | 0,09455 |

|     |         |         |       |         |
|-----|---------|---------|-------|---------|
| 253 | 0,25884 | 0,38441 | 0,515 | 0,09636 |
| 254 | 0,25884 | 0,38441 | 0,515 | 0,09818 |
| 255 | 0,25884 | 0,38441 | 0,515 | 0,1     |
| 256 | 0,25884 | 0,38441 | 0,515 | 0,10182 |
| 257 | 0,25884 | 0,38441 | 0,515 | 0,10364 |
| 258 | 0,25884 | 0,38441 | 0,515 | 0,10545 |
| 259 | 0,25884 | 0,38441 | 0,515 | 0,10727 |
| 260 | 0,25884 | 0,38441 | 0,515 | 0,10909 |
| 261 | 0,25884 | 0,38441 | 0,515 | 0,11091 |
| 262 | 0,25884 | 0,38441 | 0,515 | 0,11273 |
| 263 | 0,25884 | 0,38441 | 0,515 | 0,11455 |
| 264 | 0,25884 | 0,38441 | 0,515 | 0,11636 |
| 265 | 0,25884 | 0,38441 | 0,515 | 0,11818 |
| 266 | 0,25884 | 0,38441 | 0,515 | 0,12    |
| 267 | 0,25884 | 0,38441 | 0,515 | 0,12182 |
| 268 | 0,25884 | 0,38441 | 0,515 | 0,12364 |
| 269 | 0,25884 | 0,38441 | 0,515 | 0,12545 |
| 270 | 0,25884 | 0,38441 | 0,515 | 0,12727 |
| 271 | 0,25884 | 0,38441 | 0,515 | 0,12909 |
| 272 | 0,25884 | 0,38441 | 0,515 | 0,13091 |
| 273 | 0,25884 | 0,38441 | 0,515 | 0,13273 |
| 274 | 0,25884 | 0,38441 | 0,515 | 0,13455 |
| 275 | 0,25884 | 0,38441 | 0,515 | 0,13636 |
| 276 | 0,25884 | 0,38441 | 0,515 | 0,13818 |
| 277 | 0,25884 | 0,38441 | 0,515 | 0,14    |
| 278 | 0,25884 | 0,38441 | 0,515 | 0,14182 |
| 279 | 0,25884 | 0,38441 | 0,515 | 0,14364 |
| 280 | 0,25884 | 0,38441 | 0,515 | 0,14545 |
| 281 | 0,25884 | 0,38441 | 0,515 | 0,14727 |
| 282 | 0,25884 | 0,38441 | 0,515 | 0,14909 |
| 283 | 0,25884 | 0,38441 | 0,515 | 0,15091 |
| 284 | 0,25884 | 0,38441 | 0,515 | 0,15273 |
| 285 | 0,25884 | 0,38441 | 0,515 | 0,15455 |
| 286 | 0,25884 | 0,38441 | 0,515 | 0,15636 |

|     |         |         |       |         |
|-----|---------|---------|-------|---------|
| 287 | 0,25884 | 0,38441 | 0,515 | 0,15818 |
| 288 | 0,25884 | 0,38441 | 0,515 | 0,16    |
| 289 | 0,25884 | 0,38441 | 0,515 | 0,16182 |
| 290 | 0,25884 | 0,38441 | 0,515 | 0,16364 |
| 291 | 0,25884 | 0,38441 | 0,515 | 0,16545 |
| 292 | 0,25884 | 0,38441 | 0,515 | 0,16727 |
| 293 | 0,25884 | 0,38441 | 0,515 | 0,16909 |
| 294 | 0,25884 | 0,38441 | 0,515 | 0,17091 |
| 295 | 0,25884 | 0,38441 | 0,515 | 0,17273 |
| 296 | 0,25884 | 0,38441 | 0,515 | 0,17455 |
| 297 | 0,25884 | 0,38441 | 0,515 | 0,17636 |
| 298 | 0,25884 | 0,38441 | 0,515 | 0,17818 |
| 299 | 0,25884 | 0,38441 | 0,515 | 0,18    |
| 300 | 0,25884 | 0,38441 | 0,515 | 0,18182 |
| 301 | 0,25884 | 0,38441 | 0,515 | 0,18364 |
| 302 | 0,25884 | 0,38441 | 0,515 | 0,18545 |
| 303 | 0,25884 | 0,38441 | 0,515 | 0,18727 |
| 304 | 0,25884 | 0,38441 | 0,515 | 0,18909 |
| 305 | 0,25884 | 0,38441 | 0,515 | 0,19091 |
| 306 | 0,25884 | 0,38441 | 0,515 | 0,19273 |
| 307 | 0,25884 | 0,38441 | 0,515 | 0,19455 |
| 308 | 0,25884 | 0,38441 | 0,515 | 0,19636 |
| 309 | 0,25884 | 0,38441 | 0,515 | 0,19818 |
| 310 | 0,25884 | 0,38441 | 0,515 | 0,2     |
| 311 | 0,25884 | 0,38441 | 0,515 | 0,20182 |
| 312 | 0,25884 | 0,38441 | 0,515 | 0,20364 |
| 313 | 0,25884 | 0,38441 | 0,515 | 0,20545 |
| 314 | 0,25884 | 0,38441 | 0,515 | 0,20727 |
| 315 | 0,25884 | 0,38441 | 0,515 | 0,20909 |
| 316 | 0,25884 | 0,38441 | 0,515 | 0,21091 |
| 317 | 0,25884 | 0,38441 | 0,515 | 0,21273 |
| 318 | 0,25884 | 0,38441 | 0,515 | 0,21455 |
| 319 | 0,25884 | 0,38441 | 0,515 | 0,21636 |
| 320 | 0,25884 | 0,38441 | 0,515 | 0,21818 |

|     |         |         |         |         |
|-----|---------|---------|---------|---------|
| 321 | 0,25884 | 0,38441 | 0,515   | 0,22    |
| 322 | 0,25884 | 0,38441 | 0,515   | 0,22182 |
| 323 | 0,25884 | 0,38441 | 0,515   | 0,22364 |
| 324 | 0,25884 | 0,38441 | 0,515   | 0,22545 |
| 325 | 0,25884 | 0,38441 | 0,515   | 0,22727 |
| 326 | 0,25884 | 0,38441 | 0,515   | 0,22909 |
| 327 | 0,25884 | 0,38441 | 0,515   | 0,23091 |
| 328 | 0,25884 | 0,38441 | 0,515   | 0,23273 |
| 329 | 0,25884 | 0,38441 | 0,515   | 0,23455 |
| 330 | 0,25884 | 0,38441 | 0,515   | 0,23636 |
| 331 | 0,25884 | 0,38441 | 0,515   | 0,23818 |
| 332 | 0,25884 | 0,38441 | 0,515   | 0,24    |
| 333 | 0,25884 | 0,38441 | 0,515   | 0,24182 |
| 334 | 0,25884 | 0,38441 | 0,515   | 0,24364 |
| 335 | 0,25884 | 0,38441 | 0,515   | 0,24545 |
| 336 | 0,25884 | 0,38441 | 0,515   | 0,24727 |
| 337 | 0,25884 | 0,38441 | 0,515   | 0,24909 |
| 338 | 0,25884 | 0,38441 | 0,515   | 0,25091 |
| 339 | 0,25884 | 0,38441 | 0,515   | 0,25273 |
| 340 | 0,25884 | 0,38441 | 0,515   | 0,25455 |
| 341 | 0,25884 | 0,38441 | 0,515   | 0,25636 |
| 342 | 0,25884 | 0,38441 | 0,515   | 0,25818 |
| 343 | 0,27491 | 0,40015 | 0,52531 | 0,26    |
| 344 | 0,27491 | 0,40019 | 0,52474 | 0,26182 |
| 345 | 0,27692 | 0,40192 | 0,52547 | 0,26364 |
| 346 | 0,27968 | 0,40397 | 0,52625 | 0,26545 |
| 347 | 0,28281 | 0,406   | 0,52674 | 0,26727 |
| 348 | 0,2865  | 0,40834 | 0,52728 | 0,26909 |
| 349 | 0,29072 | 0,41087 | 0,5278  | 0,27091 |
| 350 | 0,29577 | 0,41368 | 0,52838 | 0,27273 |
| 351 | 0,30157 | 0,4166  | 0,52905 | 0,27455 |
| 352 | 0,30844 | 0,41988 | 0,52944 | 0,27636 |
| 353 | 0,31642 | 0,42329 | 0,53005 | 0,27818 |
| 354 | 0,32494 | 0,42694 | 0,53092 | 0,28    |

|     |            |            |         |         |
|-----|------------|------------|---------|---------|
| 355 | 0,33501    | 0,43124    | 0,53194 | 0,28182 |
| 356 | 0,34657    | 0,43594    | 0,53316 | 0,28364 |
| 357 | 0,359      | 0,44096    | 0,53464 | 0,28545 |
| 358 | 0,37249    | 0,44666    | 0,53649 | 0,28727 |
| 359 | 0,38762    | 0,45254    | 0,53896 | 0,28909 |
| 360 | 0,40385    | 0,45929    | 0,54158 | 0,29091 |
| 361 | 0,41701    | 0,46526    | 0,54383 | 0,29273 |
| 362 | 0,43468    | 0,47274    | 0,54739 | 0,29455 |
| 363 | 0,45423    | 0,48041    | 0,55133 | 0,29636 |
| 364 | 0,47399    | 0,48823    | 0,55512 | 0,29818 |
| 365 | 0,49323    | 0,49657    | 0,55871 | 0,3     |
| 366 | 0,51252    | 0,50516    | 0,56196 | 0,30182 |
| 367 | 0,5306     | 0,51275    | 0,56488 | 0,30364 |
| 368 | 0,54572    | 0,51776    | 0,56538 | 0,30545 |
| 369 | 0,55438    | 0,51739    | 0,56061 | 0,30727 |
| 370 | 0,5512     | 0,50822    | 0,54623 | 0,30909 |
| 371 | 0,53104    | 0,48455    | 0,51807 | 0,31091 |
| 372 | 0,49174    | 0,44383    | 0,47411 | 0,31273 |
| 373 | 0,42903    | 0,38374    | 0,41108 | 0,31455 |
| 374 | 0,34163    | 0,30431    | 0,32881 | 0,31636 |
| 375 | 0,24766    | 0,21988    | 0,24132 | 0,31818 |
| 376 | 0,15627    | 0,13661    | 0,15571 | 0,32    |
| 377 | 0,07815    | 0,06803    | 0,08379 | 0,32182 |
| 378 | 0,02814    | 0,02392    | 0,03512 | 0,32364 |
| 379 | 5,50486E-4 | 8,68548E-5 | 0,00567 | 0,32545 |
| 380 | 0          | 0          | 0       | 0,32727 |
| 381 | 0,02731    | 0,02445    | 0,01837 | 0,32909 |
| 382 | 0,08444    | 0,07484    | 0,06133 | 0,33091 |
| 383 | 0,16783    | 0,15047    | 0,1281  | 0,33273 |
| 384 | 0,27253    | 0,24633    | 0,21315 | 0,33455 |
| 385 | 0,39947    | 0,36041    | 0,31703 | 0,33636 |
| 386 | 0,53433    | 0,48056    | 0,4285  | 0,33818 |
| 387 | 0,64914    | 0,58484    | 0,52417 | 0,34    |
| 388 | 0,73347    | 0,66434    | 0,59588 | 0,34182 |

|     |         |         |         |         |
|-----|---------|---------|---------|---------|
| 389 | 0,78973 | 0,72103 | 0,64456 | 0,34364 |
| 390 | 0,81939 | 0,75564 | 0,67223 | 0,34545 |
| 391 | 0,83267 | 0,77637 | 0,68708 | 0,34727 |
| 392 | 0,83873 | 0,79044 | 0,69594 | 0,34909 |
| 393 | 0,84177 | 0,80315 | 0,70318 | 0,35091 |
| 394 | 0,84285 | 0,81525 | 0,7103  | 0,35273 |
| 395 | 0,84234 | 0,82507 | 0,71774 | 0,35455 |
| 396 | 0,84204 | 0,83696 | 0,72442 | 0,35636 |
| 397 | 0,83975 | 0,84866 | 0,73106 | 0,35818 |
| 398 | 0,83659 | 0,85918 | 0,73654 | 0,36    |
| 399 | 0,83432 | 0,87021 | 0,74354 | 0,36182 |
| 400 | 0,83137 | 0,88062 | 0,75106 | 0,36364 |
| 401 | 0,82744 | 0,89047 | 0,75777 | 0,36545 |
| 402 | 0,82262 | 0,90165 | 0,76529 | 0,36727 |
| 403 | 0,81606 | 0,91145 | 0,77236 | 0,36909 |
| 404 | 0,80987 | 0,91919 | 0,77906 | 0,37091 |
| 405 | 0,80348 | 0,92733 | 0,78471 | 0,37273 |
| 406 | 0,79657 | 0,93676 | 0,79121 | 0,37455 |
| 407 | 0,78943 | 0,94526 | 0,79863 | 0,37636 |
| 408 | 0,7826  | 0,95354 | 0,80644 | 0,37818 |
| 409 | 0,77375 | 0,96128 | 0,81335 | 0,38    |
| 410 | 0,76548 | 0,96761 | 0,82027 | 0,38182 |
| 411 | 0,75732 | 0,97178 | 0,8274  | 0,38364 |
| 412 | 0,74899 | 0,97625 | 0,83476 | 0,38545 |
| 413 | 0,74075 | 0,98172 | 0,84247 | 0,38727 |
| 414 | 0,73295 | 0,98669 | 0,85001 | 0,38909 |
| 415 | 0,7231  | 0,99077 | 0,85681 | 0,39091 |
| 416 | 0,71164 | 0,99288 | 0,86354 | 0,39273 |
| 417 | 0,7022  | 0,99471 | 0,87056 | 0,39455 |
| 418 | 0,69423 | 0,99538 | 0,87748 | 0,39636 |
| 419 | 0,68545 | 0,99712 | 0,88455 | 0,39818 |
| 420 | 0,67524 | 0,99903 | 0,8919  | 0,4     |
| 421 | 0,66465 | 1       | 0,89894 | 0,40182 |
| 422 | 0,65198 | 0,99909 | 0,90459 | 0,40364 |

|     |         |         |         |         |
|-----|---------|---------|---------|---------|
| 423 | 0,64066 | 0,99649 | 0,91054 | 0,40545 |
| 424 | 0,63123 | 0,99449 | 0,91713 | 0,40727 |
| 425 | 0,62203 | 0,99271 | 0,92296 | 0,40909 |
| 426 | 0,61216 | 0,99324 | 0,92891 | 0,41091 |
| 427 | 0,60197 | 0,99224 | 0,93549 | 0,41273 |
| 428 | 0,59178 | 0,9903  | 0,94205 | 0,41455 |
| 429 | 0,58332 | 0,98833 | 0,94804 | 0,41636 |
| 430 | 0,5765  | 0,98642 | 0,954   | 0,41818 |
| 431 | 0,57019 | 0,98405 | 0,96081 | 0,42    |
| 432 | 0,56452 | 0,98178 | 0,968   | 0,42182 |
| 433 | 0,55854 | 0,98033 | 0,9733  | 0,42364 |
| 434 | 0,55294 | 0,97909 | 0,97815 | 0,42545 |
| 435 | 0,547   | 0,97676 | 0,98207 | 0,42727 |
| 436 | 0,54035 | 0,97292 | 0,98529 | 0,42909 |
| 437 | 0,53415 | 0,96681 | 0,98854 | 0,43091 |
| 438 | 0,52784 | 0,96206 | 0,9925  | 0,43273 |
| 439 | 0,52331 | 0,95818 | 0,99512 | 0,43455 |
| 440 | 0,51834 | 0,95411 | 0,99606 | 0,43636 |
| 441 | 0,51236 | 0,94973 | 0,99795 | 0,43818 |
| 442 | 0,50693 | 0,94274 | 0,99877 | 0,44    |
| 443 | 0,50227 | 0,93521 | 0,99908 | 0,44182 |
| 444 | 0,49678 | 0,92783 | 1       | 0,44364 |
| 445 | 0,49144 | 0,92158 | 0,99944 | 0,44545 |
| 446 | 0,48629 | 0,91451 | 0,99842 | 0,44727 |
| 447 | 0,48043 | 0,9072  | 0,99689 | 0,44909 |
| 448 | 0,47514 | 0,89871 | 0,99488 | 0,45091 |
| 449 | 0,46989 | 0,88919 | 0,99296 | 0,45273 |
| 450 | 0,46417 | 0,88058 | 0,9905  | 0,45455 |
| 451 | 0,45853 | 0,87228 | 0,9877  | 0,45636 |
| 452 | 0,45392 | 0,86389 | 0,98418 | 0,45818 |
| 453 | 0,44901 | 0,85555 | 0,97992 | 0,46    |
| 454 | 0,44396 | 0,84701 | 0,97625 | 0,46182 |
| 455 | 0,43871 | 0,83706 | 0,97277 | 0,46364 |
| 456 | 0,43405 | 0,82778 | 0,96838 | 0,46545 |



|     |         |         |         |         |
|-----|---------|---------|---------|---------|
| 457 | 0,4293  | 0,81842 | 0,96323 | 0,46727 |
| 458 | 0,42505 | 0,80997 | 0,95837 | 0,46909 |
| 459 | 0,42114 | 0,80236 | 0,9527  | 0,47091 |
| 460 | 0,41615 | 0,7945  | 0,94867 | 0,47273 |
| 461 | 0,41162 | 0,78623 | 0,94509 | 0,47455 |
| 462 | 0,40833 | 0,77808 | 0,94119 | 0,47636 |
| 463 | 0,40489 | 0,77066 | 0,93586 | 0,47818 |
| 464 | 0,40219 | 0,76301 | 0,93168 | 0,48    |
| 465 | 0,3984  | 0,75509 | 0,92701 | 0,48182 |
| 466 | 0,39551 | 0,74762 | 0,92316 | 0,48364 |
| 467 | 0,39309 | 0,74061 | 0,91813 | 0,48545 |
| 468 | 0,39016 | 0,73328 | 0,91349 | 0,48727 |
| 469 | 0,38751 | 0,7267  | 0,91012 | 0,48909 |
| 470 | 0,38536 | 0,72063 | 0,90654 | 0,49091 |
| 471 | 0,38288 | 0,7134  | 0,90194 | 0,49273 |
| 472 | 0,38006 | 0,70625 | 0,89637 | 0,49455 |
| 473 | 0,37824 | 0,70062 | 0,89171 | 0,49636 |
| 474 | 0,37573 | 0,69395 | 0,88627 | 0,49818 |
| 475 | 0,37348 | 0,68743 | 0,88153 | 0,5     |
| 476 | 0,37172 | 0,68063 | 0,87766 | 0,50182 |
| 477 | 0,36971 | 0,67547 | 0,87331 | 0,50364 |
| 478 | 0,36811 | 0,67043 | 0,86932 | 0,50545 |
| 479 | 0,36533 | 0,66458 | 0,86445 | 0,50727 |
| 480 | 0,36343 | 0,65779 | 0,85863 | 0,50909 |
| 481 | 0,36164 | 0,65106 | 0,85329 | 0,51091 |
| 482 | 0,35964 | 0,64557 | 0,84923 | 0,51273 |
| 483 | 0,35788 | 0,64063 | 0,84561 | 0,51455 |
| 484 | 0,35558 | 0,63545 | 0,84017 | 0,51636 |
| 485 | 0,35288 | 0,62933 | 0,83581 | 0,51818 |
| 486 | 0,35082 | 0,62425 | 0,83167 | 0,52    |
| 487 | 0,34873 | 0,6191  | 0,82652 | 0,52182 |
| 488 | 0,3466  | 0,61393 | 0,82161 | 0,52364 |
| 489 | 0,3441  | 0,61003 | 0,81808 | 0,52545 |
| 490 | 0,3422  | 0,606   | 0,81451 | 0,52727 |

|     |         |         |         |         |
|-----|---------|---------|---------|---------|
| 491 | 0,34021 | 0,6013  | 0,8108  | 0,52909 |
| 492 | 0,33811 | 0,59639 | 0,80664 | 0,53091 |
| 493 | 0,3363  | 0,59265 | 0,8032  | 0,53273 |
| 494 | 0,33455 | 0,58901 | 0,79926 | 0,53455 |
| 495 | 0,33264 | 0,58577 | 0,79599 | 0,53636 |
| 496 | 0,33054 | 0,58294 | 0,79441 | 0,53818 |
| 497 | 0,32871 | 0,57968 | 0,79237 | 0,54    |
| 498 | 0,32714 | 0,57624 | 0,79006 | 0,54182 |
| 499 | 0,32579 | 0,57342 | 0,7875  | 0,54364 |
| 500 | 0,32371 | 0,56997 | 0,78487 | 0,54545 |
| 501 | 0,32235 | 0,56715 | 0,78247 | 0,54727 |
| 502 | 0,32093 | 0,56496 | 0,78096 | 0,54909 |
| 503 | 0,31964 | 0,56312 | 0,78008 | 0,55091 |
| 504 | 0,31834 | 0,56138 | 0,77891 | 0,55273 |
| 505 | 0,31703 | 0,55855 | 0,77701 | 0,55455 |
| 506 | 0,31579 | 0,55672 | 0,77539 | 0,55636 |
| 507 | 0,31466 | 0,55537 | 0,77495 | 0,55818 |
| 508 | 0,3137  | 0,55401 | 0,77429 | 0,56    |
| 509 | 0,3126  | 0,55252 | 0,77376 | 0,56182 |
| 510 | 0,31182 | 0,55085 | 0,77332 | 0,56364 |
| 511 | 0,31074 | 0,5486  | 0,77179 | 0,56545 |
| 512 | 0,3096  | 0,54696 | 0,77021 | 0,56727 |
| 513 | 0,309   | 0,54543 | 0,76939 | 0,56909 |
| 514 | 0,30816 | 0,544   | 0,76932 | 0,57091 |
| 515 | 0,30739 | 0,54293 | 0,76872 | 0,57273 |
| 516 | 0,30653 | 0,54207 | 0,7679  | 0,57455 |
| 517 | 0,30539 | 0,54041 | 0,76708 | 0,57636 |
| 518 | 0,30457 | 0,53849 | 0,7657  | 0,57818 |
| 519 | 0,30382 | 0,53715 | 0,76469 | 0,58    |
| 520 | 0,30296 | 0,53557 | 0,76398 | 0,58182 |
| 521 | 0,30239 | 0,53424 | 0,76308 | 0,58364 |
| 522 | 0,30161 | 0,5332  | 0,76249 | 0,58545 |
| 523 | 0,30071 | 0,53127 | 0,76147 | 0,58727 |
| 524 | 0,30025 | 0,52991 | 0,75964 | 0,58909 |

|     |         |         |         |         |
|-----|---------|---------|---------|---------|
| 525 | 0,29953 | 0,52843 | 0,75842 | 0,59091 |
| 526 | 0,29842 | 0,52719 | 0,75726 | 0,59273 |
| 527 | 0,29766 | 0,52564 | 0,7562  | 0,59455 |
| 528 | 0,29669 | 0,52436 | 0,75476 | 0,59636 |
| 529 | 0,29588 | 0,52311 | 0,75342 | 0,59818 |
| 530 | 0,29508 | 0,52137 | 0,75194 | 0,6     |
| 531 | 0,29397 | 0,51981 | 0,74994 | 0,60182 |
| 532 | 0,29318 | 0,5183  | 0,7488  | 0,60364 |
| 533 | 0,2924  | 0,51704 | 0,74693 | 0,60545 |
| 534 | 0,29171 | 0,51575 | 0,74499 | 0,60727 |
| 535 | 0,29083 | 0,51427 | 0,74337 | 0,60909 |
| 536 | 0,29008 | 0,51272 | 0,74196 | 0,61091 |
| 537 | 0,28933 | 0,51111 | 0,74019 | 0,61273 |
| 538 | 0,28832 | 0,50951 | 0,73834 | 0,61455 |
| 539 | 0,28773 | 0,50784 | 0,73663 | 0,61636 |
| 540 | 0,28674 | 0,50644 | 0,73433 | 0,61818 |
| 541 | 0,28586 | 0,50493 | 0,73142 | 0,62    |
| 542 | 0,28525 | 0,50338 | 0,73022 | 0,62182 |
| 543 | 0,28461 | 0,50142 | 0,7287  | 0,62364 |
| 544 | 0,28373 | 0,49971 | 0,72626 | 0,62545 |
| 545 | 0,28281 | 0,49837 | 0,7238  | 0,62727 |
| 546 | 0,28203 | 0,49706 | 0,7216  | 0,62909 |
| 547 | 0,28144 | 0,49556 | 0,7196  | 0,63091 |
| 548 | 0,28075 | 0,49358 | 0,71748 | 0,63273 |
| 549 | 0,28028 | 0,49181 | 0,71482 | 0,63455 |
| 550 | 0,27958 | 0,4904  | 0,71245 | 0,63636 |
| 551 | 0,27896 | 0,48858 | 0,70974 | 0,63818 |
| 552 | 0,27843 | 0,48731 | 0,70732 | 0,64    |
| 553 | 0,27773 | 0,48556 | 0,70438 | 0,64182 |
| 554 | 0,27723 | 0,48385 | 0,70178 | 0,64364 |
| 555 | 0,27657 | 0,48209 | 0,69945 | 0,64545 |
| 556 | 0,27574 | 0,48029 | 0,69619 | 0,64727 |
| 557 | 0,2752  | 0,47871 | 0,69297 | 0,64909 |
| 558 | 0,27501 | 0,47729 | 0,69012 | 0,65091 |

|     |         |         |         |         |
|-----|---------|---------|---------|---------|
| 559 | 0,27443 | 0,47522 | 0,68798 | 0,65273 |
| 560 | 0,27397 | 0,47298 | 0,68532 | 0,65455 |
| 561 | 0,27348 | 0,4713  | 0,68216 | 0,65636 |
| 562 | 0,27273 | 0,46951 | 0,67879 | 0,65818 |
| 563 | 0,27244 | 0,46732 | 0,67495 | 0,66    |
| 564 | 0,27187 | 0,46532 | 0,67113 | 0,66182 |
| 565 | 0,27129 | 0,46343 | 0,66805 | 0,66364 |
| 566 | 0,27097 | 0,46098 | 0,66478 | 0,66545 |
| 567 | 0,27054 | 0,45871 | 0,66049 | 0,66727 |
| 568 | 0,26995 | 0,4571  | 0,65639 | 0,66909 |
| 569 | 0,2696  | 0,45502 | 0,6525  | 0,67091 |
| 570 | 0,26913 | 0,45277 | 0,6483  | 0,67273 |
| 571 | 0,2687  | 0,45035 | 0,64428 | 0,67455 |
| 572 | 0,26812 | 0,4481  | 0,64036 | 0,67636 |
| 573 | 0,26775 | 0,44609 | 0,63649 | 0,67818 |
| 574 | 0,26747 | 0,44419 | 0,63309 | 0,68    |
| 575 | 0,26711 | 0,44183 | 0,62903 | 0,68182 |
| 576 | 0,26668 | 0,43973 | 0,62474 | 0,68364 |
| 577 | 0,26624 | 0,43749 | 0,62108 | 0,68545 |
| 578 | 0,26593 | 0,43576 | 0,61716 | 0,68727 |
| 579 | 0,26558 | 0,4339  | 0,61306 | 0,68909 |
| 580 | 0,26516 | 0,43191 | 0,60956 | 0,69091 |
| 581 | 0,26475 | 0,42971 | 0,60601 | 0,69273 |
| 582 | 0,2645  | 0,42806 | 0,60259 | 0,69455 |
| 583 | 0,26426 | 0,42657 | 0,59932 | 0,69636 |
| 584 | 0,26399 | 0,42472 | 0,59589 | 0,69818 |
| 585 | 0,26372 | 0,42308 | 0,59239 | 0,7     |
| 586 | 0,26347 | 0,42154 | 0,58923 | 0,70182 |
| 587 | 0,26317 | 0,41992 | 0,58632 | 0,70364 |
| 588 | 0,26291 | 0,41858 | 0,58378 | 0,70545 |
| 589 | 0,26273 | 0,41717 | 0,58099 | 0,70727 |
| 590 | 0,26254 | 0,4159  | 0,57833 | 0,70909 |
| 591 | 0,26234 | 0,41455 | 0,57596 | 0,71091 |
| 592 | 0,26217 | 0,41359 | 0,57385 | 0,71273 |

|     |         |         |         |         |
|-----|---------|---------|---------|---------|
| 593 | 0,262   | 0,41241 | 0,57184 | 0,71455 |
| 594 | 0,26177 | 0,41101 | 0,56954 | 0,71636 |
| 595 | 0,26164 | 0,41001 | 0,56738 | 0,71818 |
| 596 | 0,26153 | 0,409   | 0,56548 | 0,72    |
| 597 | 0,26136 | 0,40807 | 0,56363 | 0,72182 |
| 598 | 0,26122 | 0,40726 | 0,56174 | 0,72364 |
| 599 | 0,26115 | 0,40638 | 0,55982 | 0,72545 |
| 600 | 0,26104 | 0,40542 | 0,55806 | 0,72727 |
| 601 | 0,26089 | 0,40466 | 0,55673 | 0,72909 |
| 602 | 0,26079 | 0,40381 | 0,55516 | 0,73091 |
| 603 | 0,26067 | 0,40305 | 0,55387 | 0,73273 |
| 604 | 0,26059 | 0,40245 | 0,55224 | 0,73455 |
| 605 | 0,26055 | 0,40175 | 0,55037 | 0,73636 |
| 606 | 0,26045 | 0,4009  | 0,54917 | 0,73818 |
| 607 | 0,26032 | 0,40033 | 0,54786 | 0,74    |
| 608 | 0,26023 | 0,39957 | 0,54643 | 0,74182 |
| 609 | 0,2602  | 0,39887 | 0,54511 | 0,74364 |
| 610 | 0,26008 | 0,39835 | 0,54423 | 0,74545 |
| 611 | 0,26001 | 0,39776 | 0,543   | 0,74727 |
| 612 | 0,25993 | 0,39721 | 0,54171 | 0,74909 |
| 613 | 0,25989 | 0,39662 | 0,54074 | 0,75091 |
| 614 | 0,25986 | 0,3962  | 0,53973 | 0,75273 |
| 615 | 0,25983 | 0,39574 | 0,53853 | 0,75455 |
| 616 | 0,25978 | 0,39525 | 0,53764 | 0,75636 |
| 617 | 0,25971 | 0,39475 | 0,53686 | 0,75818 |
| 618 | 0,25968 | 0,39438 | 0,53594 | 0,76    |
| 619 | 0,25963 | 0,39405 | 0,53505 | 0,76182 |
| 620 | 0,25961 | 0,39368 | 0,5342  | 0,76364 |
| 621 | 0,25958 | 0,39327 | 0,53347 | 0,76545 |
| 622 | 0,2595  | 0,39277 | 0,53259 | 0,76727 |
| 623 | 0,25944 | 0,39247 | 0,53181 | 0,76909 |
| 624 | 0,25942 | 0,39211 | 0,53111 | 0,77091 |
| 625 | 0,25939 | 0,39177 | 0,53038 | 0,77273 |
| 626 | 0,25934 | 0,39146 | 0,52971 | 0,77455 |

|     |         |         |         |         |
|-----|---------|---------|---------|---------|
| 627 | 0,25931 | 0,39119 | 0,52922 | 0,77636 |
| 628 | 0,25932 | 0,39088 | 0,52853 | 0,77818 |
| 629 | 0,25925 | 0,39055 | 0,52791 | 0,78    |
| 630 | 0,25924 | 0,39024 | 0,52726 | 0,78182 |
| 631 | 0,25922 | 0,39003 | 0,52675 | 0,78364 |
| 632 | 0,2592  | 0,38974 | 0,52626 | 0,78545 |
| 633 | 0,25919 | 0,3894  | 0,52574 | 0,78727 |
| 634 | 0,25917 | 0,38921 | 0,52522 | 0,78909 |
| 635 | 0,25915 | 0,389   | 0,52483 | 0,79091 |
| 636 | 0,25912 | 0,38881 | 0,5244  | 0,79273 |
| 637 | 0,2591  | 0,38861 | 0,52388 | 0,79455 |
| 638 | 0,25907 | 0,38841 | 0,52338 | 0,79636 |
| 639 | 0,25905 | 0,38822 | 0,52308 | 0,79818 |
| 640 | 0,25903 | 0,38803 | 0,5228  | 0,8     |
| 641 | 0,25903 | 0,38784 | 0,52238 | 0,80182 |
| 642 | 0,25902 | 0,38768 | 0,5221  | 0,80364 |
| 643 | 0,259   | 0,38754 | 0,52172 | 0,80545 |
| 644 | 0,25898 | 0,38741 | 0,52133 | 0,80727 |
| 645 | 0,25898 | 0,38726 | 0,52102 | 0,80909 |
| 646 | 0,25896 | 0,3871  | 0,52082 | 0,81091 |
| 647 | 0,25895 | 0,38694 | 0,52046 | 0,81273 |
| 648 | 0,25896 | 0,38684 | 0,52015 | 0,81455 |
| 649 | 0,25894 | 0,38674 | 0,51988 | 0,81636 |
| 650 | 0,25893 | 0,38665 | 0,51969 | 0,81818 |
| 651 | 0,25892 | 0,38647 | 0,51944 | 0,82    |
| 652 | 0,25891 | 0,3864  | 0,51921 | 0,82182 |
| 653 | 0,2589  | 0,38631 | 0,51899 | 0,82364 |
| 654 | 0,2589  | 0,38621 | 0,5188  | 0,82545 |
| 655 | 0,2589  | 0,38612 | 0,51858 | 0,82727 |
| 656 | 0,2589  | 0,38598 | 0,5184  | 0,82909 |
| 657 | 0,2589  | 0,38593 | 0,51829 | 0,83091 |
| 658 | 0,25889 | 0,38587 | 0,51811 | 0,83273 |
| 659 | 0,25887 | 0,3858  | 0,51795 | 0,83455 |
| 660 | 0,25887 | 0,38576 | 0,51782 | 0,83636 |

|     |         |         |         |         |
|-----|---------|---------|---------|---------|
| 661 | 0,25888 | 0,38569 | 0,51769 | 0,83818 |
| 662 | 0,25887 | 0,38559 | 0,51753 | 0,84    |
| 663 | 0,25886 | 0,38554 | 0,5174  | 0,84182 |
| 664 | 0,25885 | 0,38547 | 0,51726 | 0,84364 |
| 665 | 0,25883 | 0,3854  | 0,51713 | 0,84545 |
| 666 | 0,25882 | 0,38536 | 0,51702 | 0,84727 |
| 667 | 0,25883 | 0,3853  | 0,51689 | 0,84909 |
| 668 | 0,25883 | 0,38525 | 0,51677 | 0,85091 |
| 669 | 0,25883 | 0,38518 | 0,51673 | 0,85273 |
| 670 | 0,25882 | 0,38513 | 0,51666 | 0,85455 |
| 671 | 0,25882 | 0,38509 | 0,51653 | 0,85636 |
| 672 | 0,25881 | 0,38506 | 0,51645 | 0,85818 |
| 673 | 0,25881 | 0,38503 | 0,51642 | 0,86    |
| 674 | 0,25882 | 0,38499 | 0,51632 | 0,86182 |
| 675 | 0,2588  | 0,38496 | 0,51624 | 0,86364 |
| 676 | 0,2588  | 0,38494 | 0,51616 | 0,86545 |
| 677 | 0,25881 | 0,38489 | 0,51611 | 0,86727 |
| 678 | 0,25879 | 0,38484 | 0,51606 | 0,86909 |
| 679 | 0,25879 | 0,38485 | 0,51599 | 0,87091 |
| 680 | 0,25879 | 0,38482 | 0,51594 | 0,87273 |
| 681 | 0,25879 | 0,38477 | 0,5159  | 0,87455 |
| 682 | 0,25879 | 0,38475 | 0,51583 | 0,87636 |
| 683 | 0,25879 | 0,38475 | 0,51579 | 0,87818 |
| 684 | 0,25879 | 0,38474 | 0,51574 | 0,88    |
| 685 | 0,25879 | 0,38472 | 0,51572 | 0,88182 |
| 686 | 0,25879 | 0,38471 | 0,51566 | 0,88364 |
| 687 | 0,25879 | 0,38469 | 0,51563 | 0,88545 |
| 688 | 0,25878 | 0,38467 | 0,51561 | 0,88727 |
| 689 | 0,25878 | 0,38464 | 0,51557 | 0,88909 |
| 690 | 0,25878 | 0,38464 | 0,51554 | 0,89091 |
| 691 | 0,25878 | 0,38463 | 0,51549 | 0,89273 |
| 692 | 0,25878 | 0,38461 | 0,51546 | 0,89455 |
| 693 | 0,25878 | 0,3846  | 0,51545 | 0,89636 |
| 694 | 0,25878 | 0,38457 | 0,51544 | 0,89818 |

|     |         |         |         |         |
|-----|---------|---------|---------|---------|
| 695 | 0,25877 | 0,38456 | 0,5154  | 0,9     |
| 696 | 0,25878 | 0,38456 | 0,51536 | 0,90182 |
| 697 | 0,25877 | 0,38457 | 0,51536 | 0,90364 |
| 698 | 0,25877 | 0,38456 | 0,51532 | 0,90545 |
| 699 | 0,25877 | 0,38454 | 0,51531 | 0,90727 |
| 700 | 0,25879 | 0,38453 | 0,5153  | 0,90909 |
| 701 | 0,25878 | 0,38452 | 0,5153  | 0,91091 |
| 702 | 0,25877 | 0,38453 | 0,51528 | 0,91273 |
| 703 | 0,25877 | 0,38451 | 0,51527 | 0,91455 |
| 704 | 0,25878 | 0,38449 | 0,51523 | 0,91636 |
| 705 | 0,25878 | 0,38448 | 0,51521 | 0,91818 |
| 706 | 0,25877 | 0,38448 | 0,51519 | 0,92    |
| 707 | 0,25877 | 0,38448 | 0,51519 | 0,92182 |
| 708 | 0,25877 | 0,38446 | 0,51518 | 0,92364 |
| 709 | 0,25877 | 0,38446 | 0,51517 | 0,92545 |
| 710 | 0,25877 | 0,38445 | 0,51515 | 0,92727 |
| 711 | 0,25877 | 0,38446 | 0,51514 | 0,92909 |
| 712 | 0,25877 | 0,38445 | 0,51514 | 0,93091 |
| 713 | 0,25877 | 0,38444 | 0,51511 | 0,93273 |
| 714 | 0,25878 | 0,38443 | 0,51511 | 0,93455 |
| 715 | 0,25877 | 0,38444 | 0,51511 | 0,93636 |
| 716 | 0,25878 | 0,38442 | 0,51511 | 0,93818 |
| 717 | 0,25878 | 0,38443 | 0,5151  | 0,94    |
| 718 | 0,25877 | 0,38442 | 0,51508 | 0,94182 |
| 719 | 0,25876 | 0,38443 | 0,51508 | 0,94364 |
| 720 | 0,25877 | 0,38442 | 0,51507 | 0,94545 |
| 721 | 0,25877 | 0,38443 | 0,51506 | 0,94727 |
| 722 | 0,25878 | 0,38442 | 0,51507 | 0,94909 |
| 723 | 0,25877 | 0,38441 | 0,51505 | 0,95091 |
| 724 | 0,25877 | 0,3844  | 0,51504 | 0,95273 |
| 725 | 0,25877 | 0,3844  | 0,51504 | 0,95455 |
| 726 | 0,25876 | 0,3844  | 0,51503 | 0,95636 |
| 727 | 0,25877 | 0,3844  | 0,51503 | 0,95818 |
| 728 | 0,25878 | 0,38441 | 0,51503 | 0,96    |



|     |         |         |         |         |
|-----|---------|---------|---------|---------|
| 729 | 0,25878 | 0,3844  | 0,51502 | 0,96182 |
| 730 | 0,25878 | 0,3844  | 0,51502 | 0,96364 |
| 731 | 0,25877 | 0,38441 | 0,51502 | 0,96545 |
| 732 | 0,25876 | 0,38439 | 0,51502 | 0,96727 |
| 733 | 0,25876 | 0,38439 | 0,51502 | 0,96909 |
| 734 | 0,25877 | 0,38439 | 0,51502 | 0,97091 |
| 735 | 0,25877 | 0,38439 | 0,51501 | 0,97273 |
| 736 | 0,25878 | 0,38439 | 0,515   | 0,97455 |
| 737 | 0,25877 | 0,38438 | 0,51499 | 0,97636 |
| 738 | 0,25877 | 0,38438 | 0,51499 | 0,97818 |
| 739 | 0,25878 | 0,38439 | 0,515   | 0,98    |
| 740 | 0,25877 | 0,38438 | 0,515   | 0,98182 |
| 741 | 0,25877 | 0,38439 | 0,51499 | 0,98364 |
| 742 | 0,25876 | 0,38439 | 0,51499 | 0,98545 |
| 743 | 0,25877 | 0,38439 | 0,51499 | 0,98727 |
| 744 | 0,25878 | 0,38439 | 0,51498 | 0,98909 |
| 745 | 0,25878 | 0,38439 | 0,51499 | 0,99091 |
| 746 | 0,25876 | 0,38438 | 0,51498 | 0,99273 |
| 747 | 0,25877 | 0,38438 | 0,51497 | 0,99455 |
| 748 | 0,25876 | 0,38437 | 0,51497 | 0,99636 |
| 749 | 0,25876 | 0,38438 | 0,51497 | 0,99818 |
| 750 | 0,25877 | 0,38438 | 0,51498 | 1       |

# NMR-Spectra

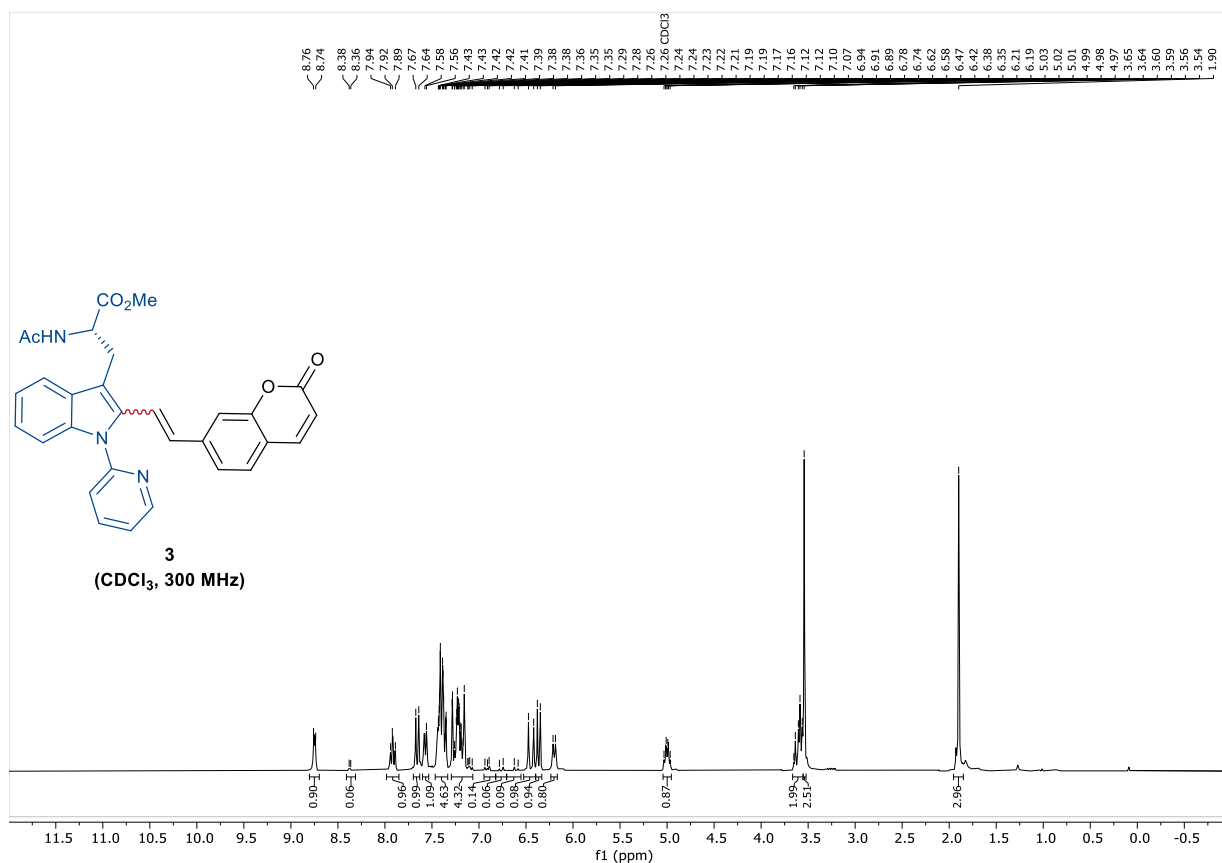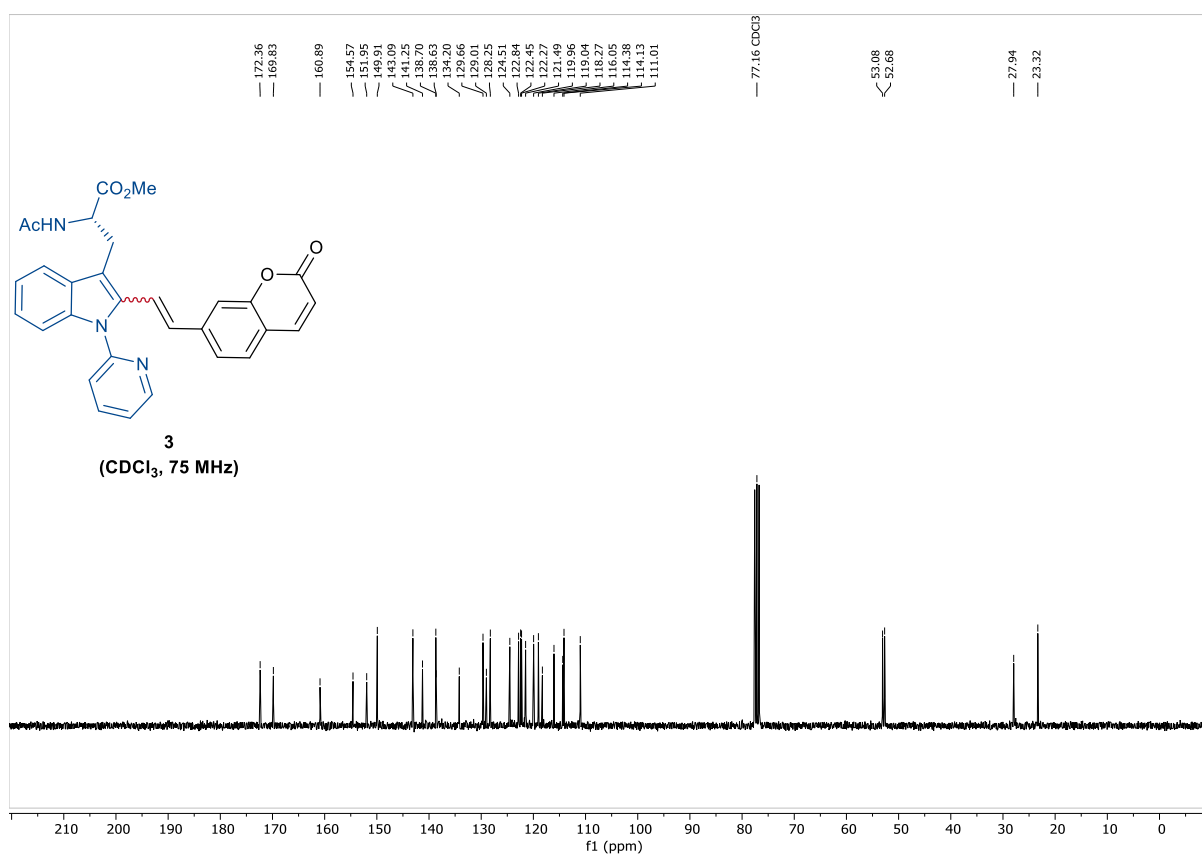

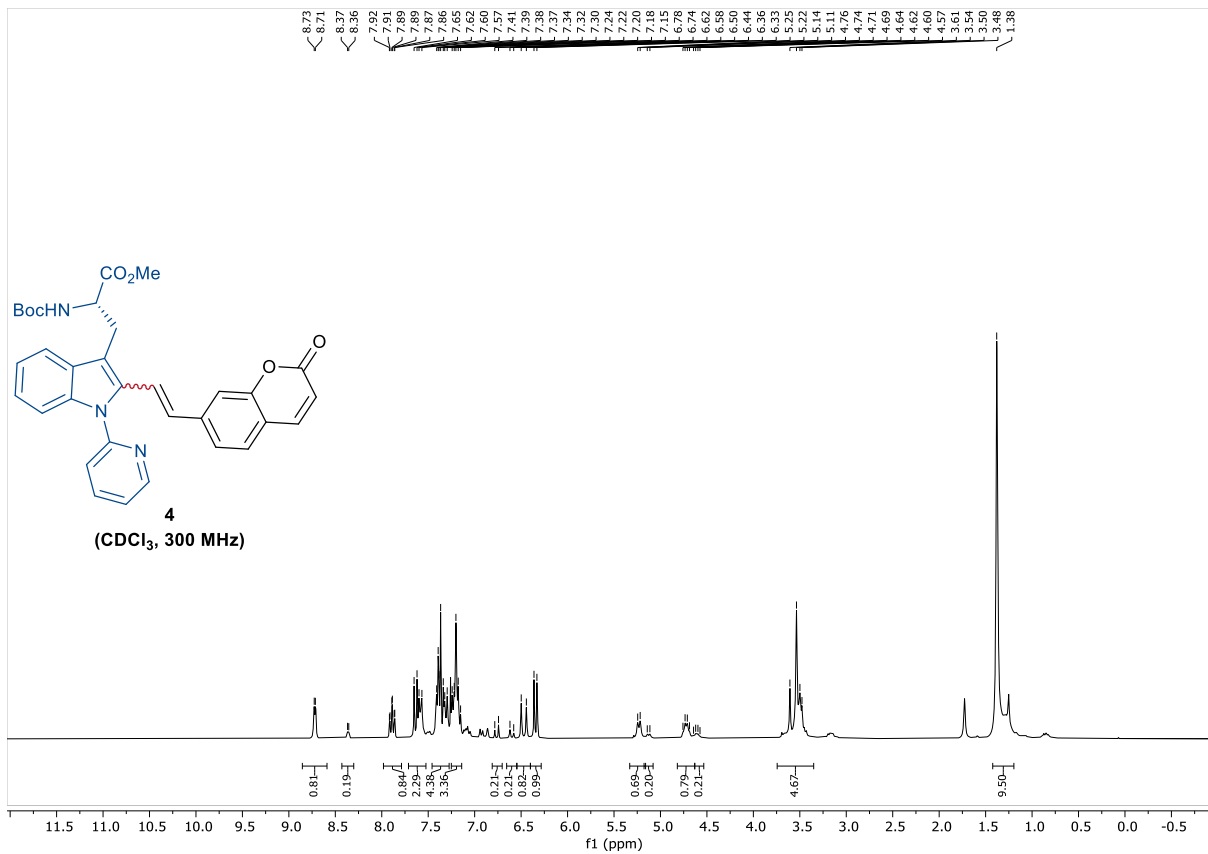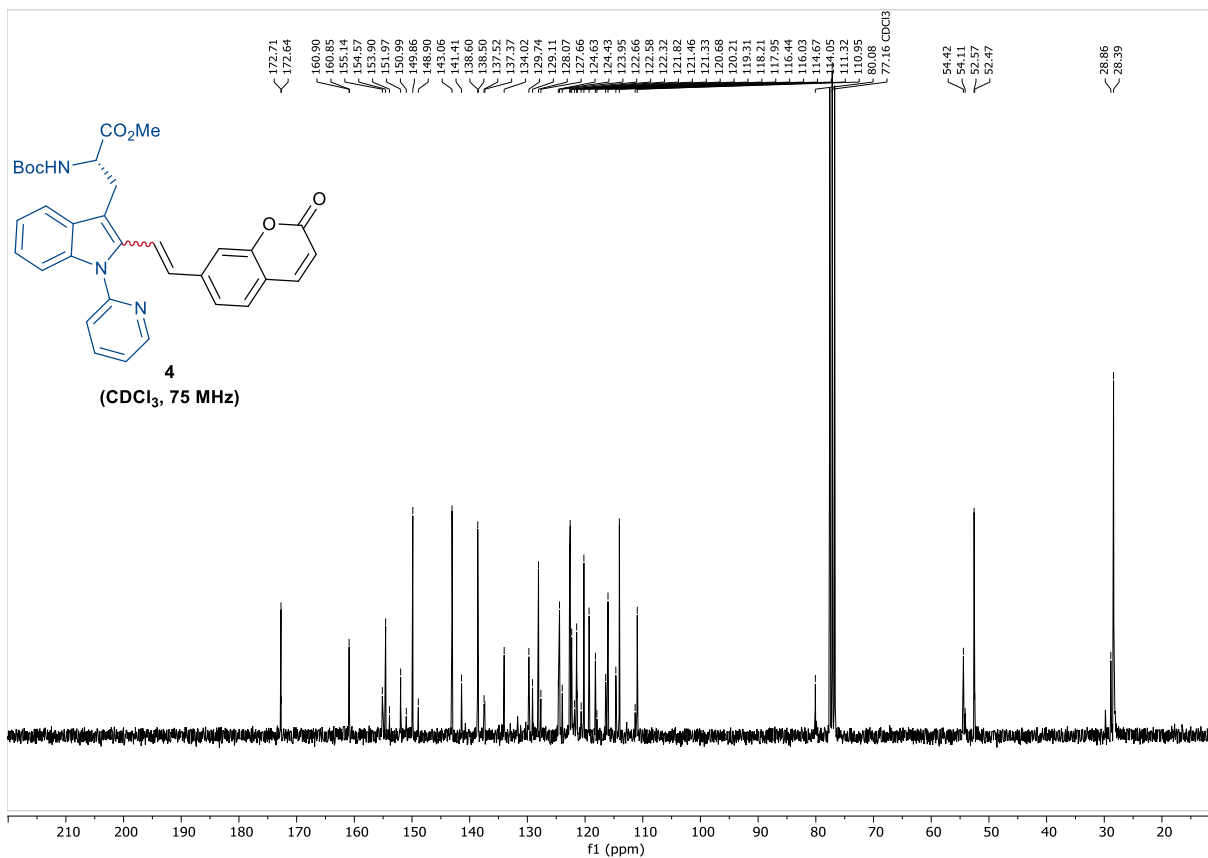

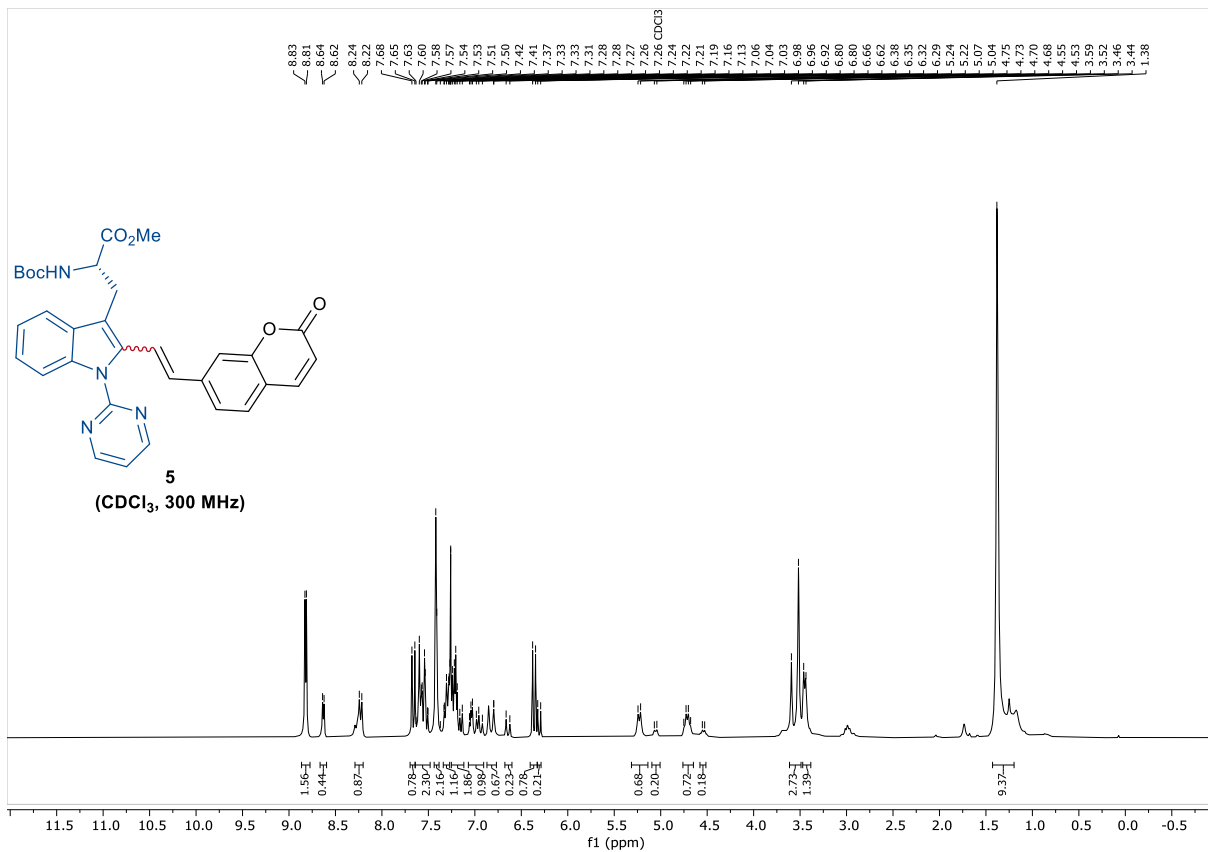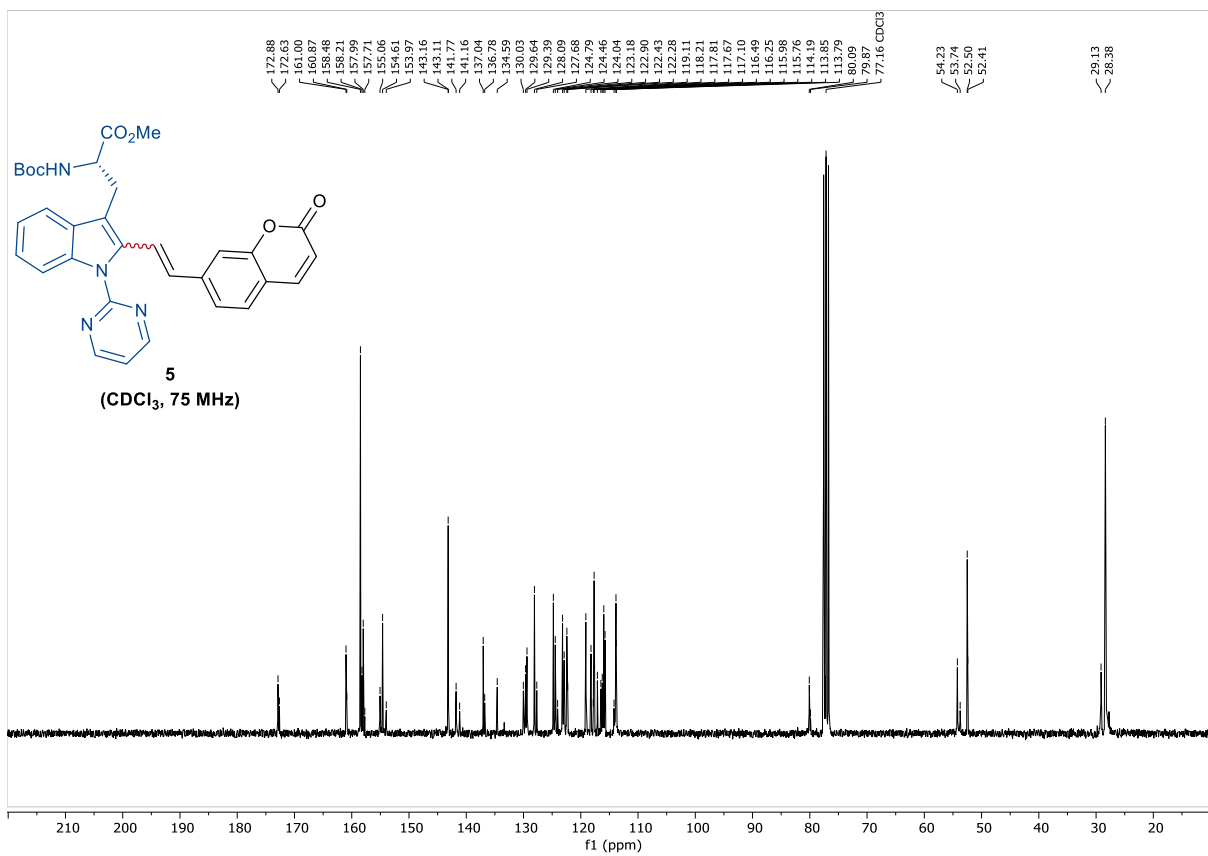

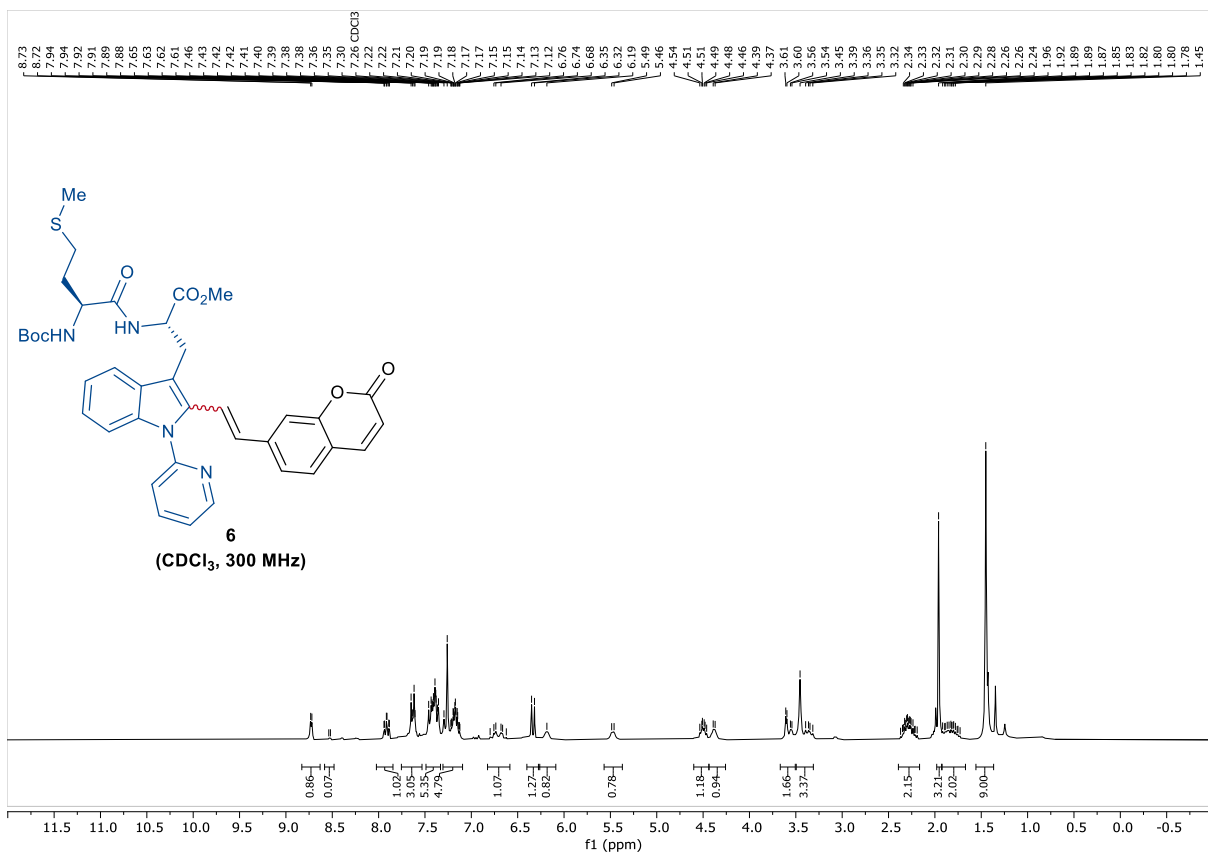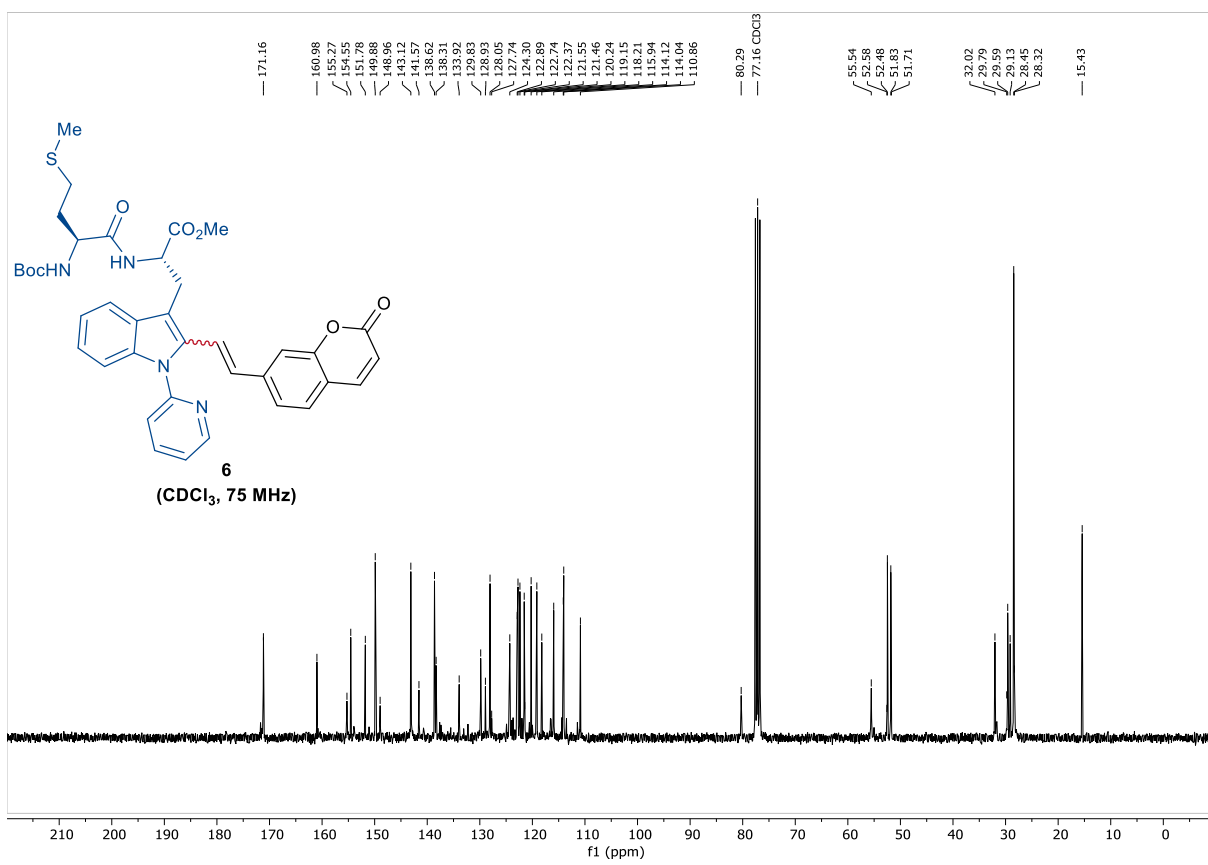

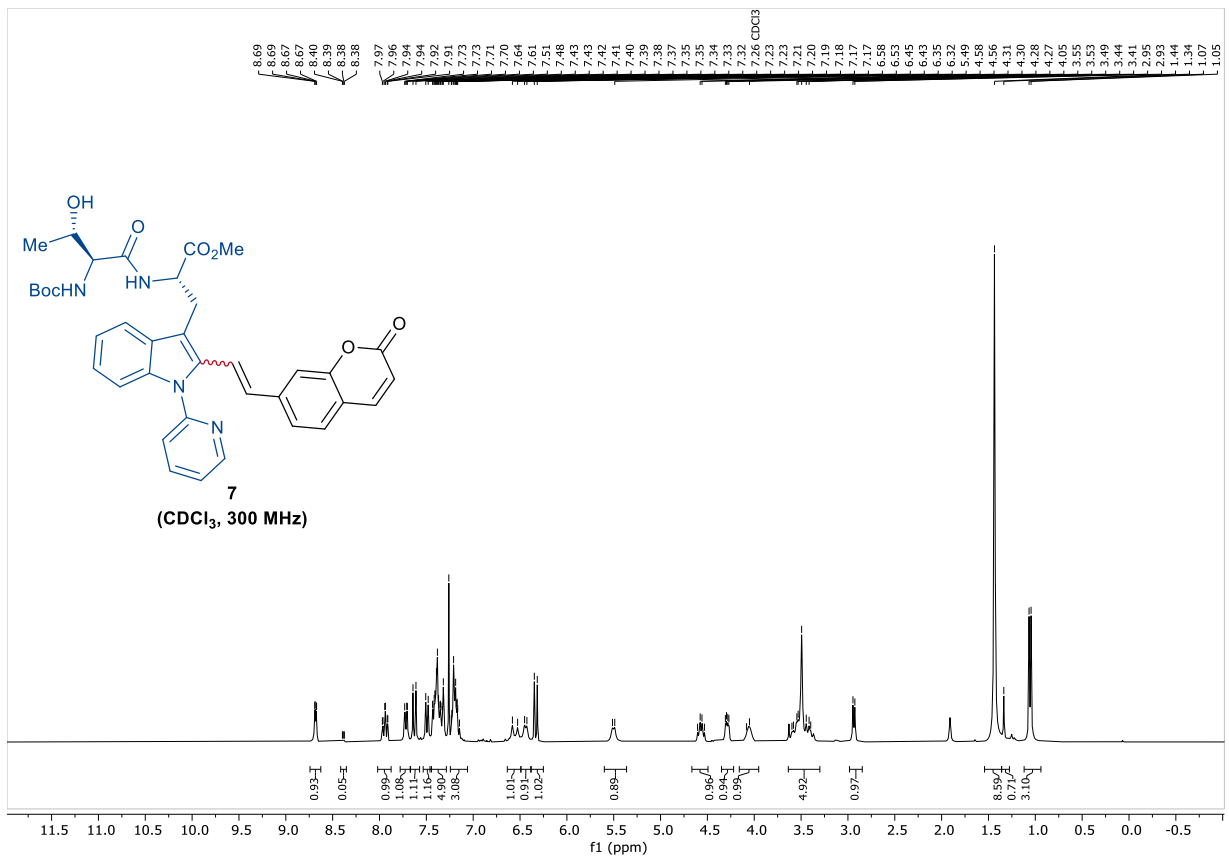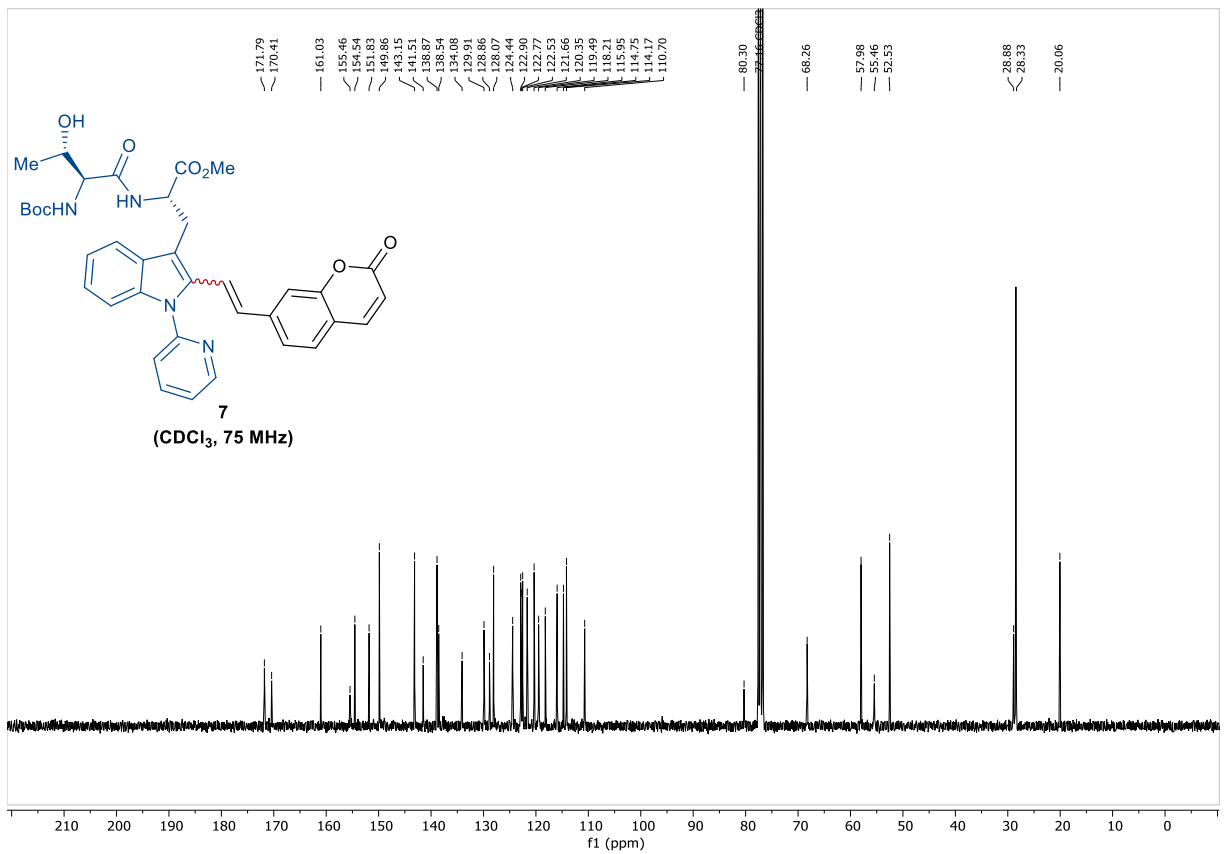

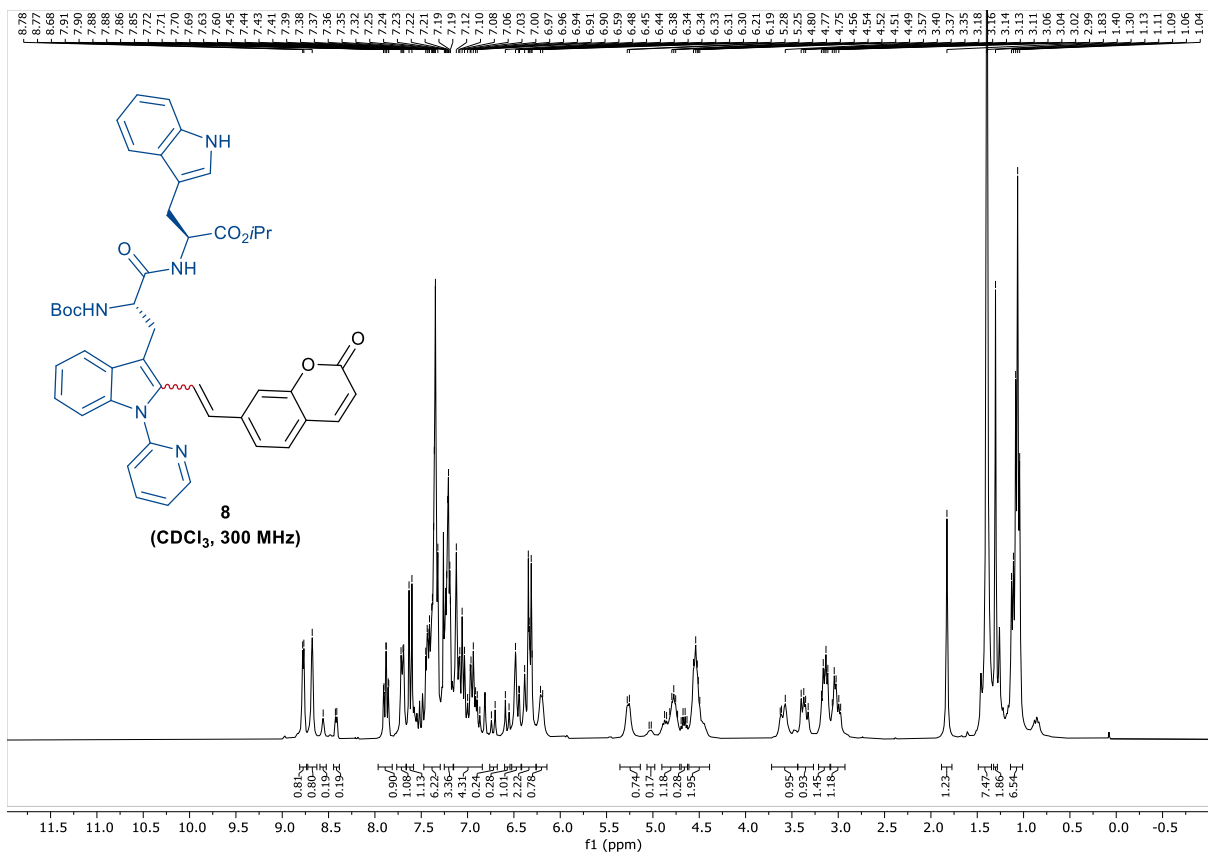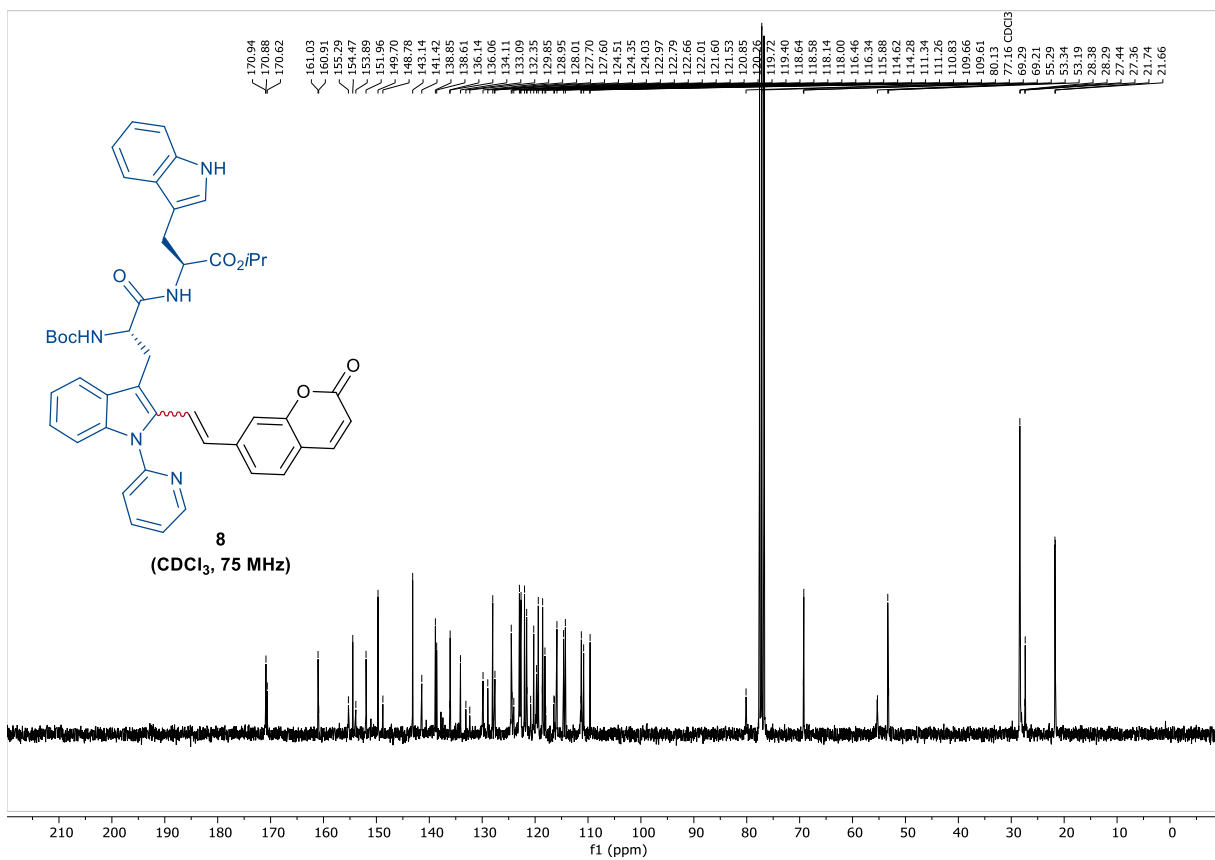

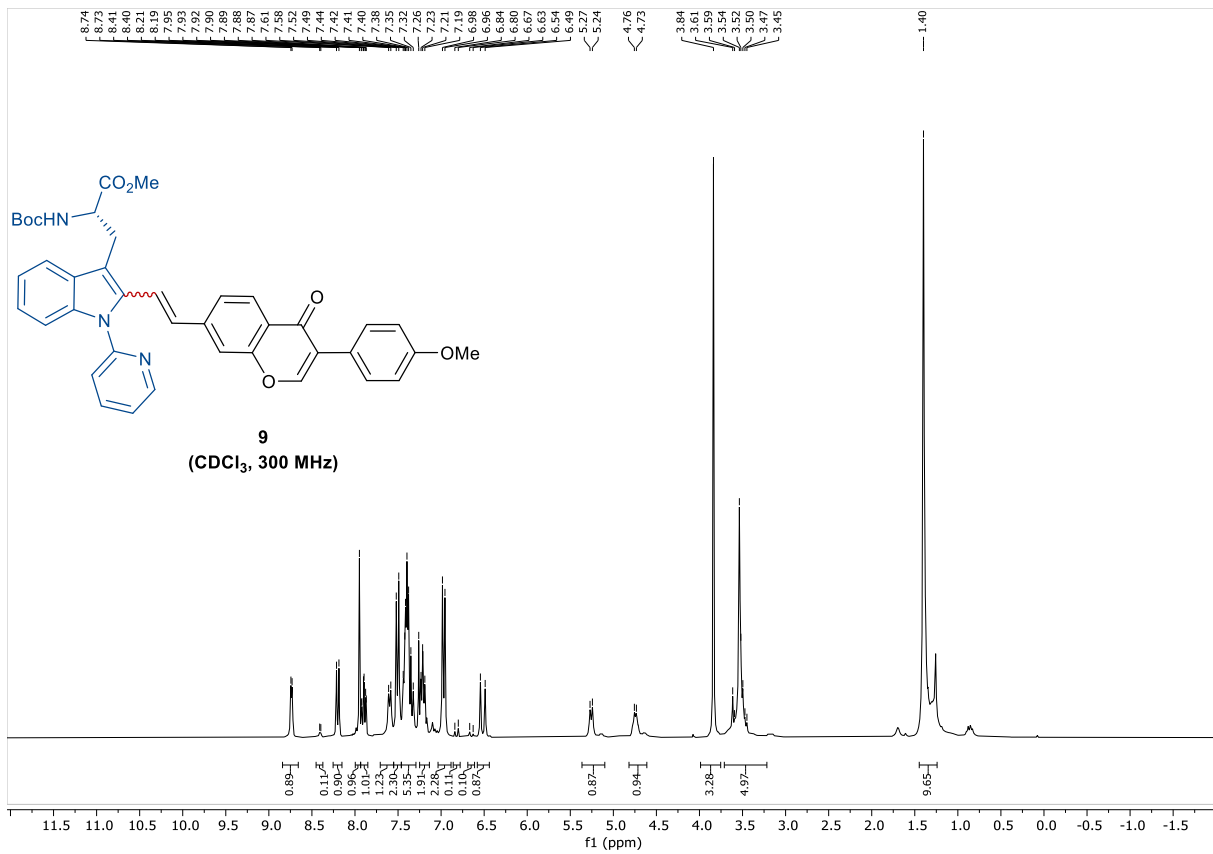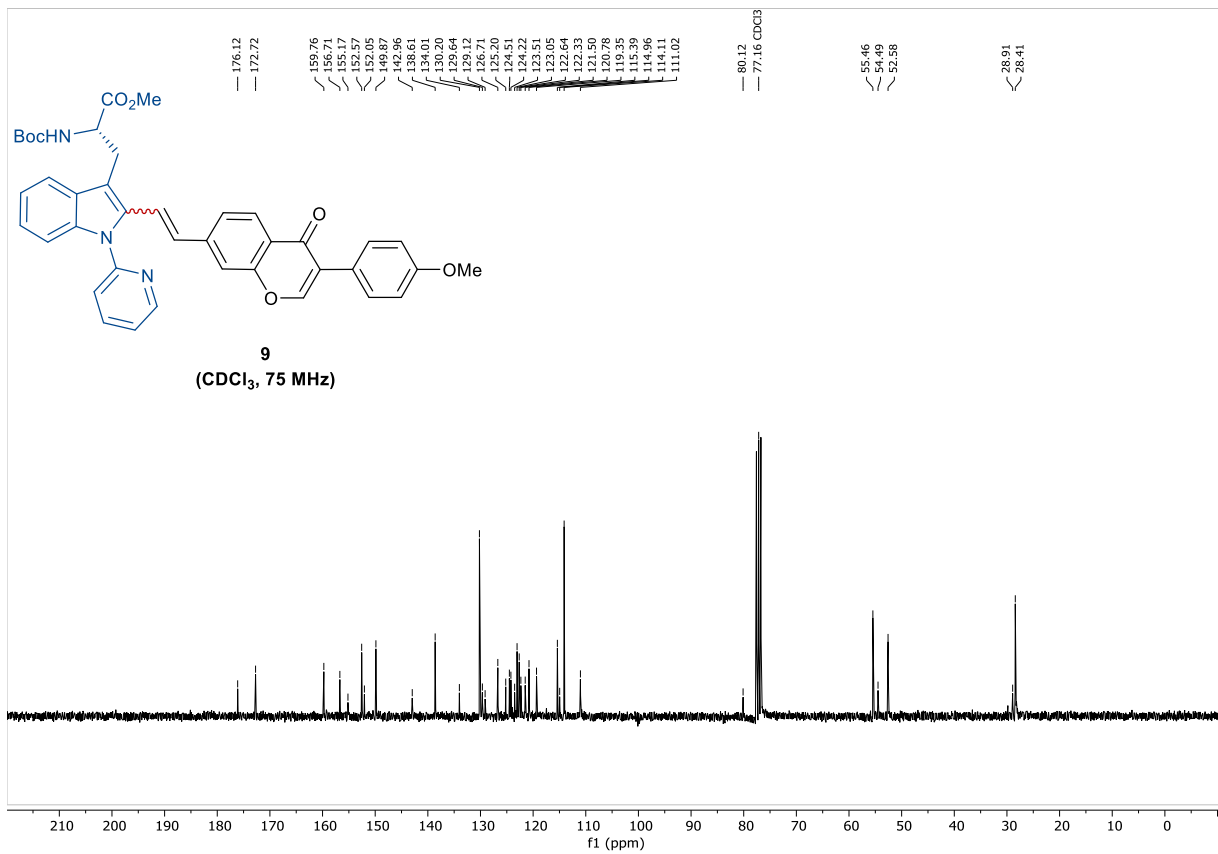



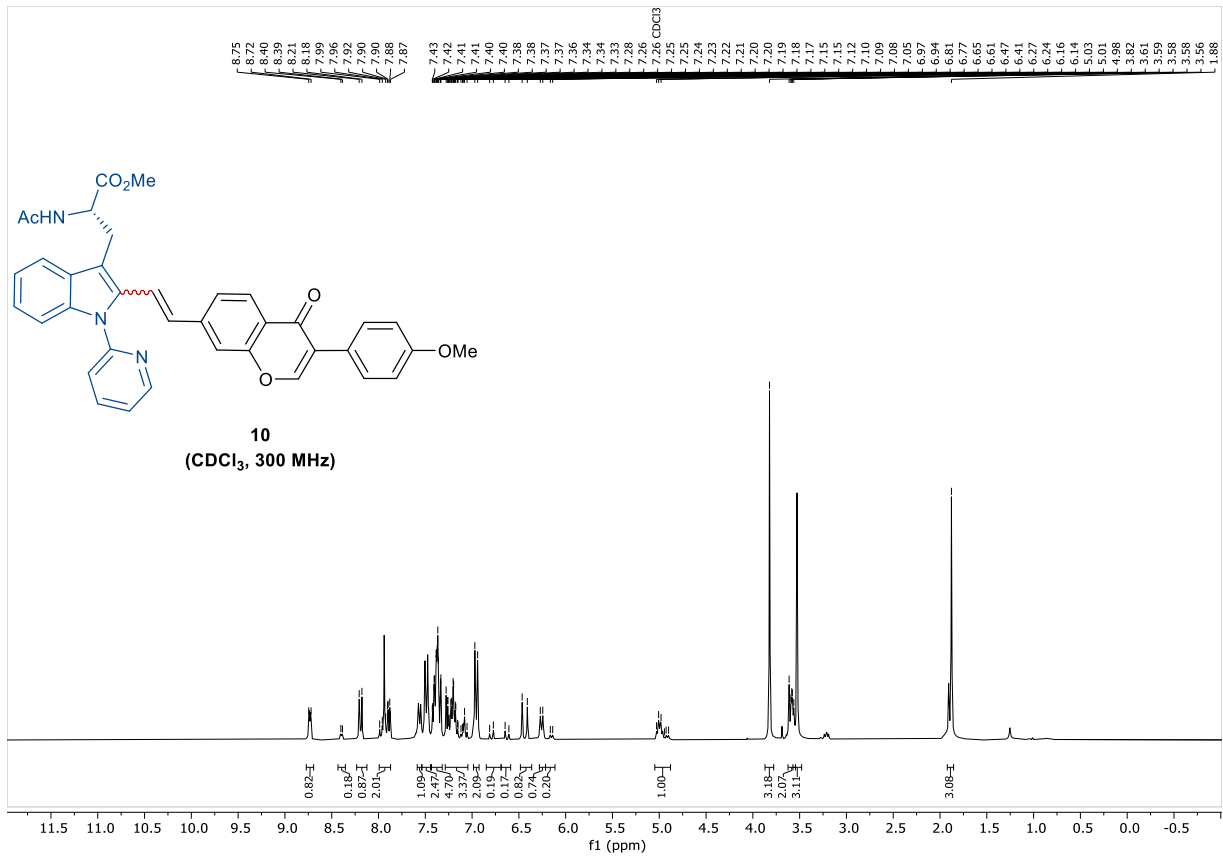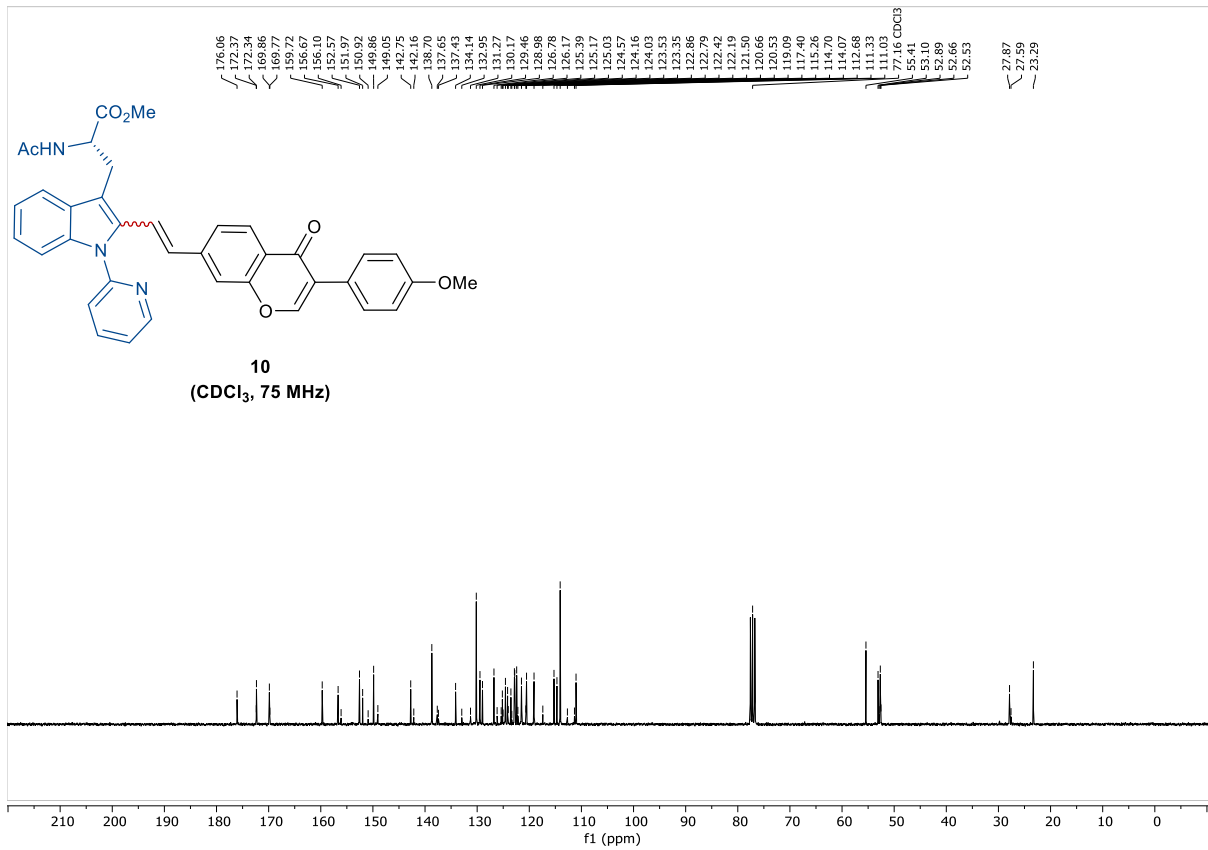

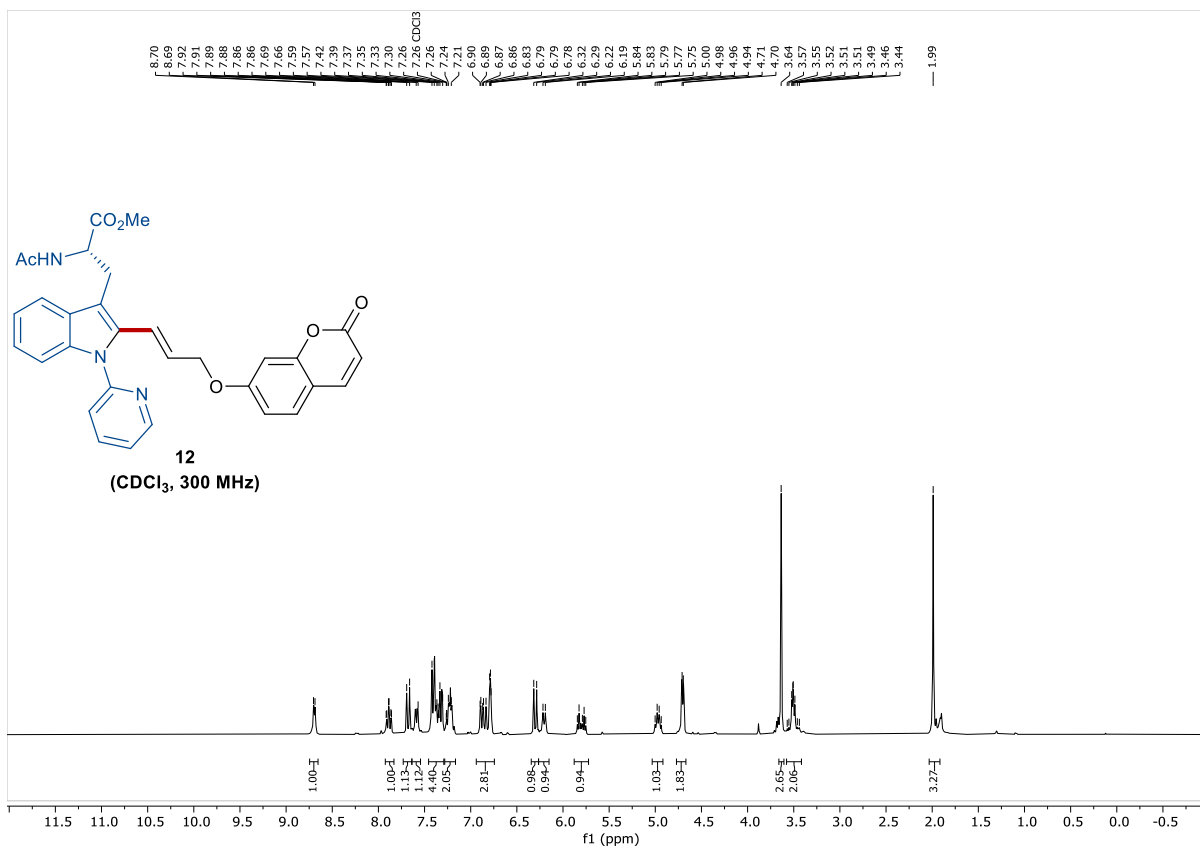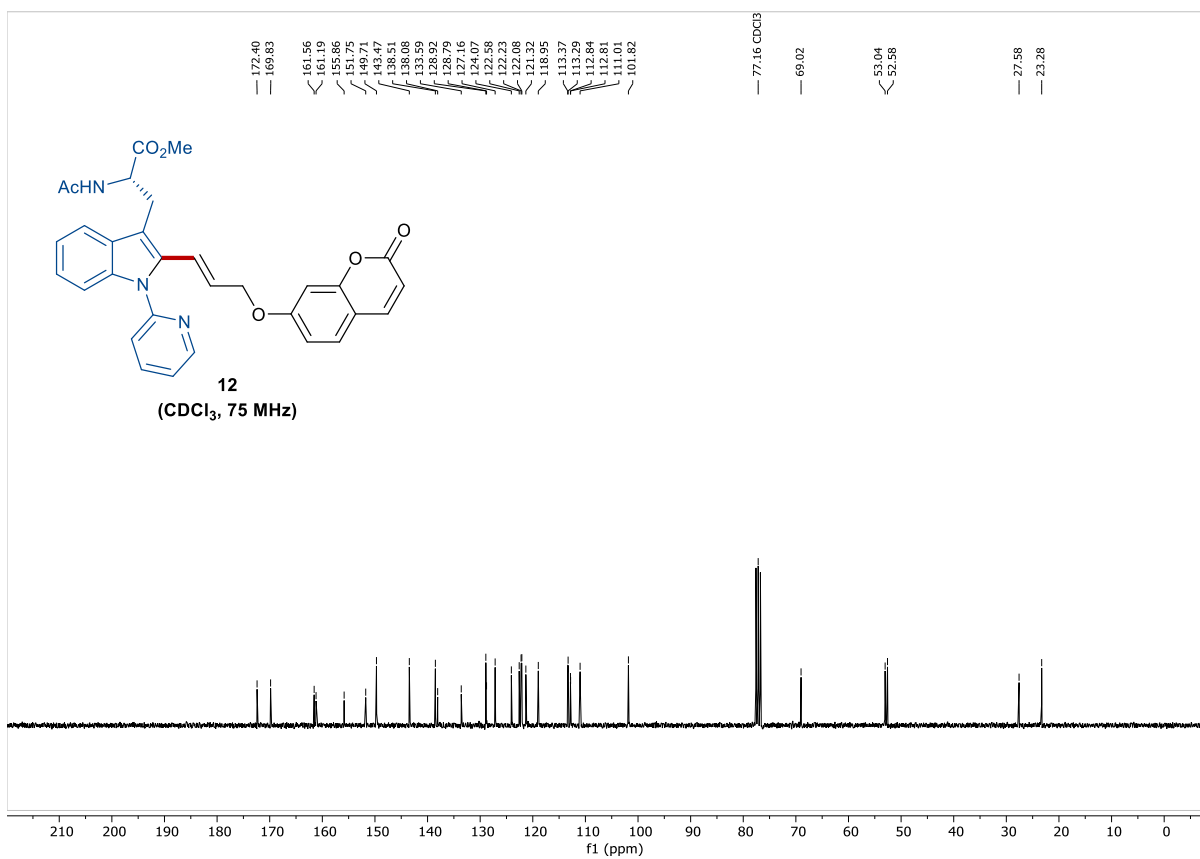

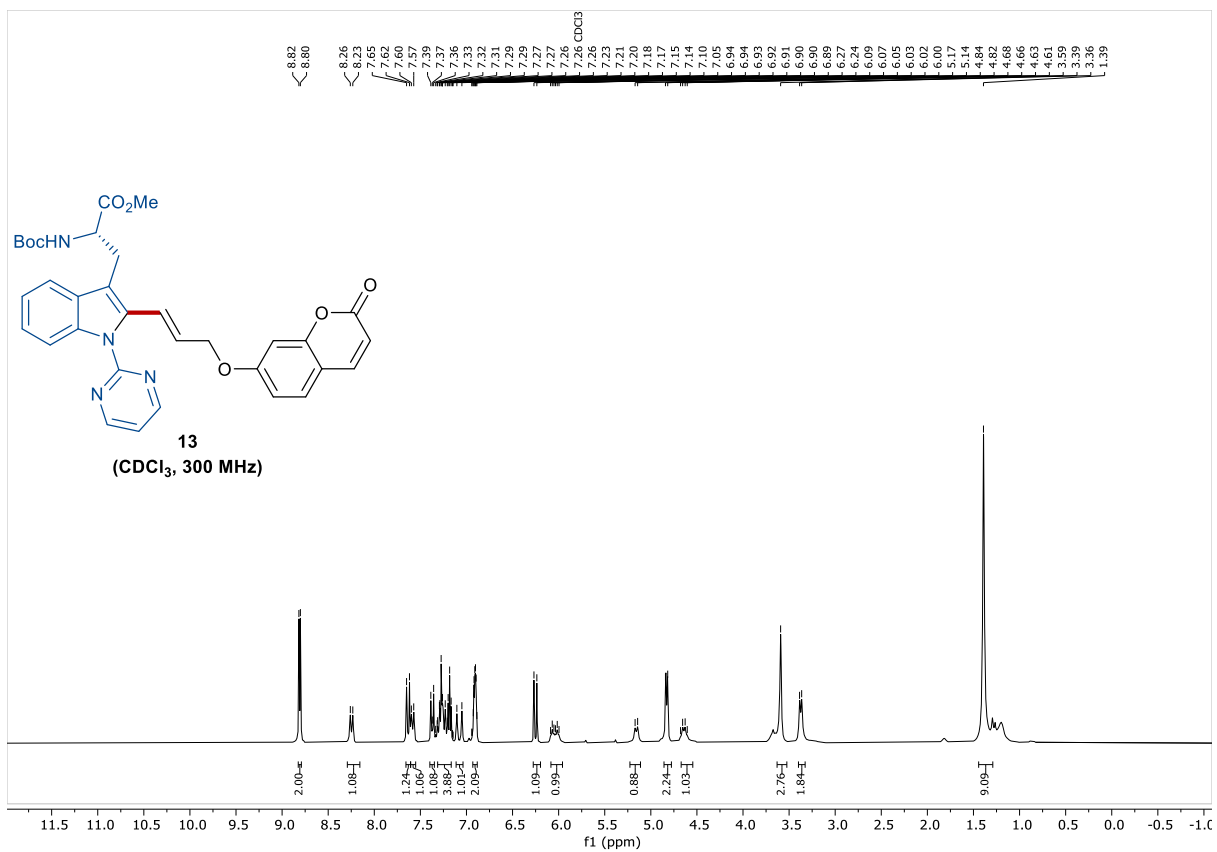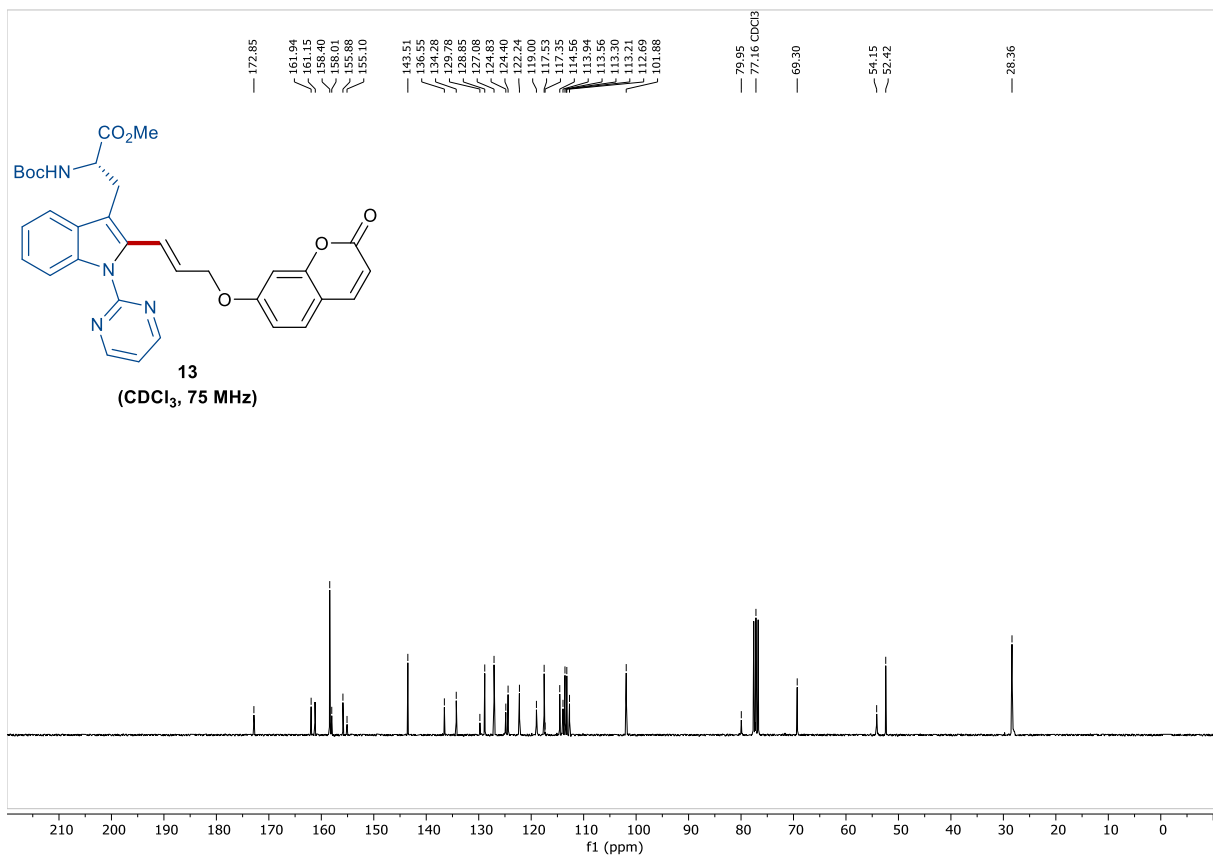

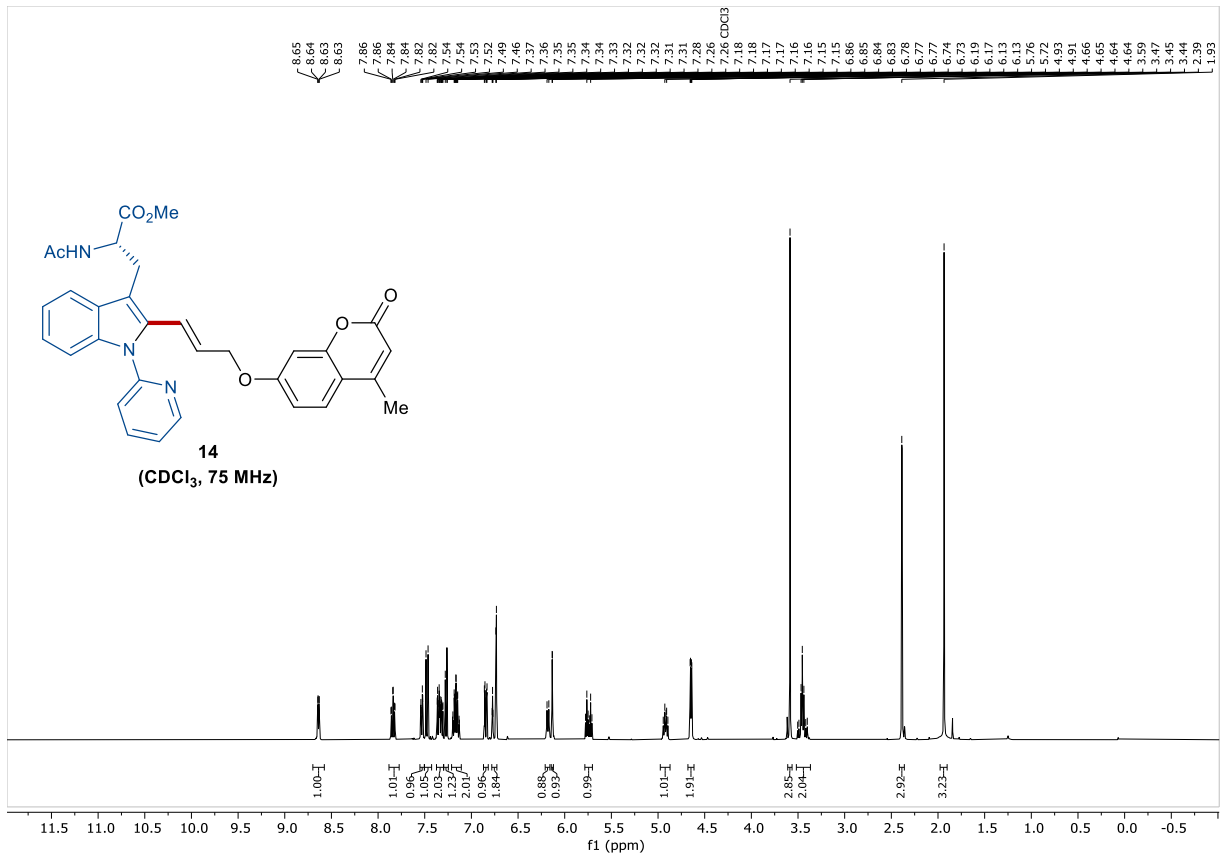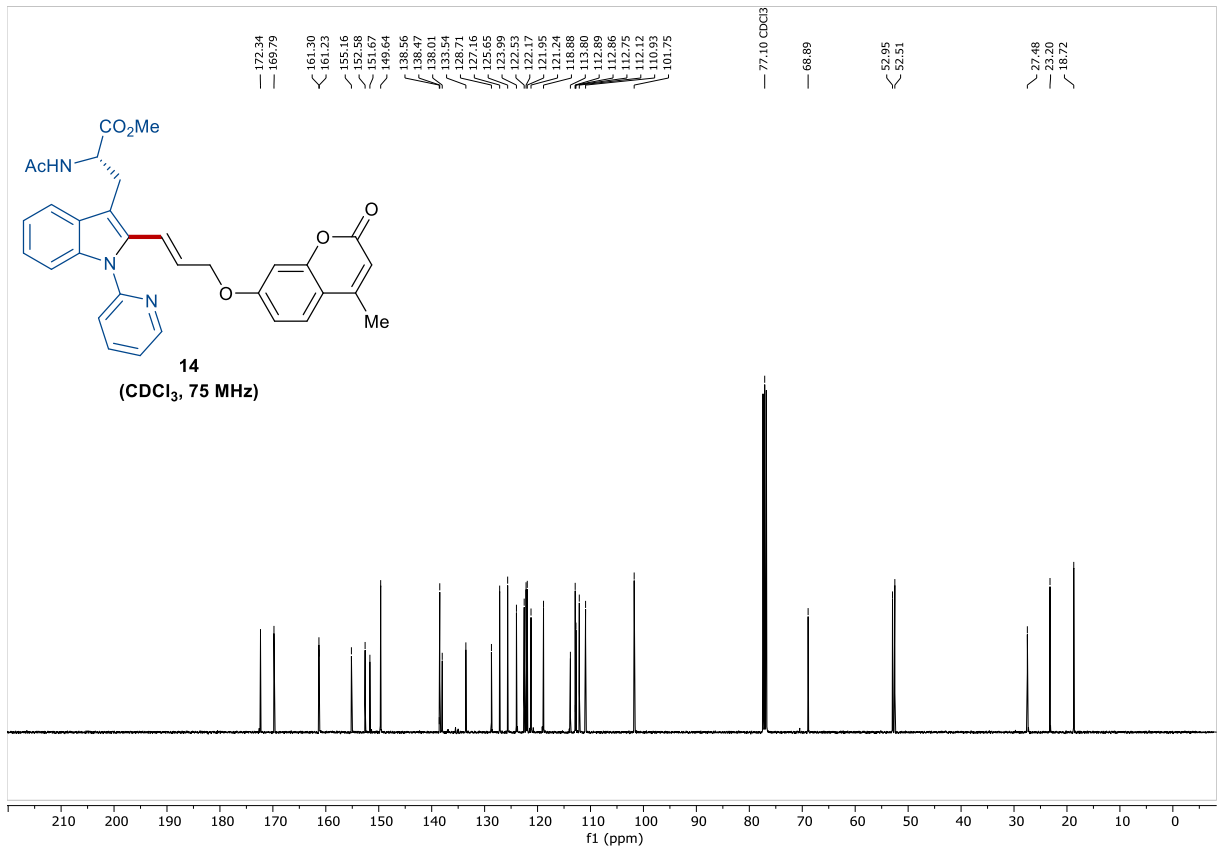

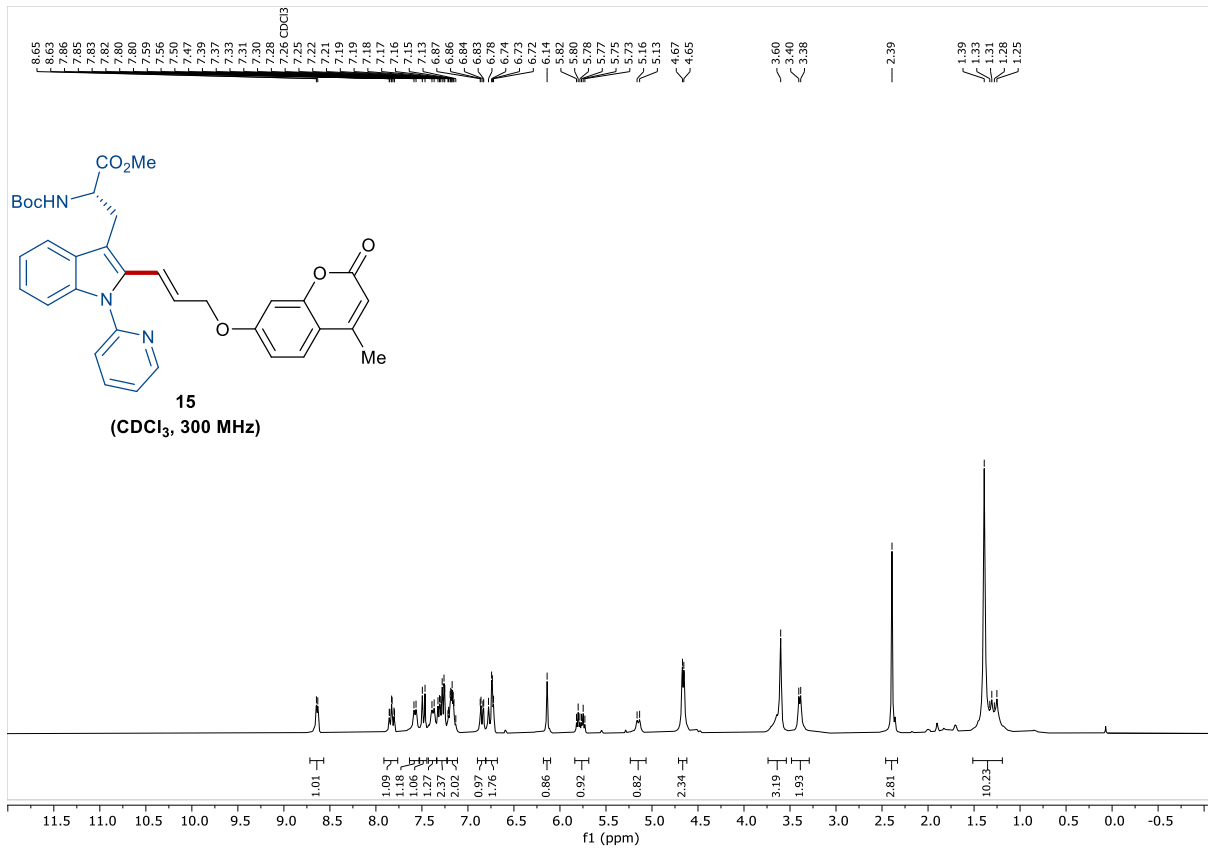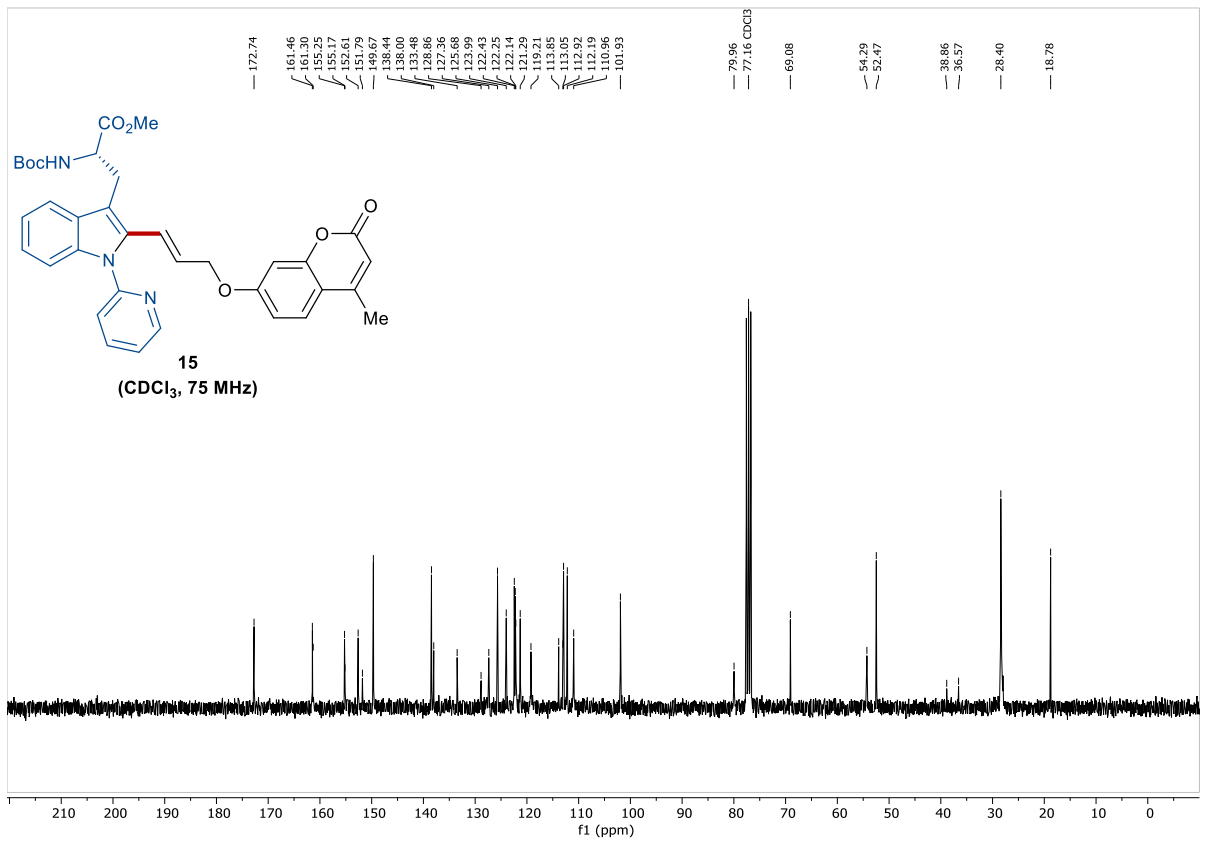



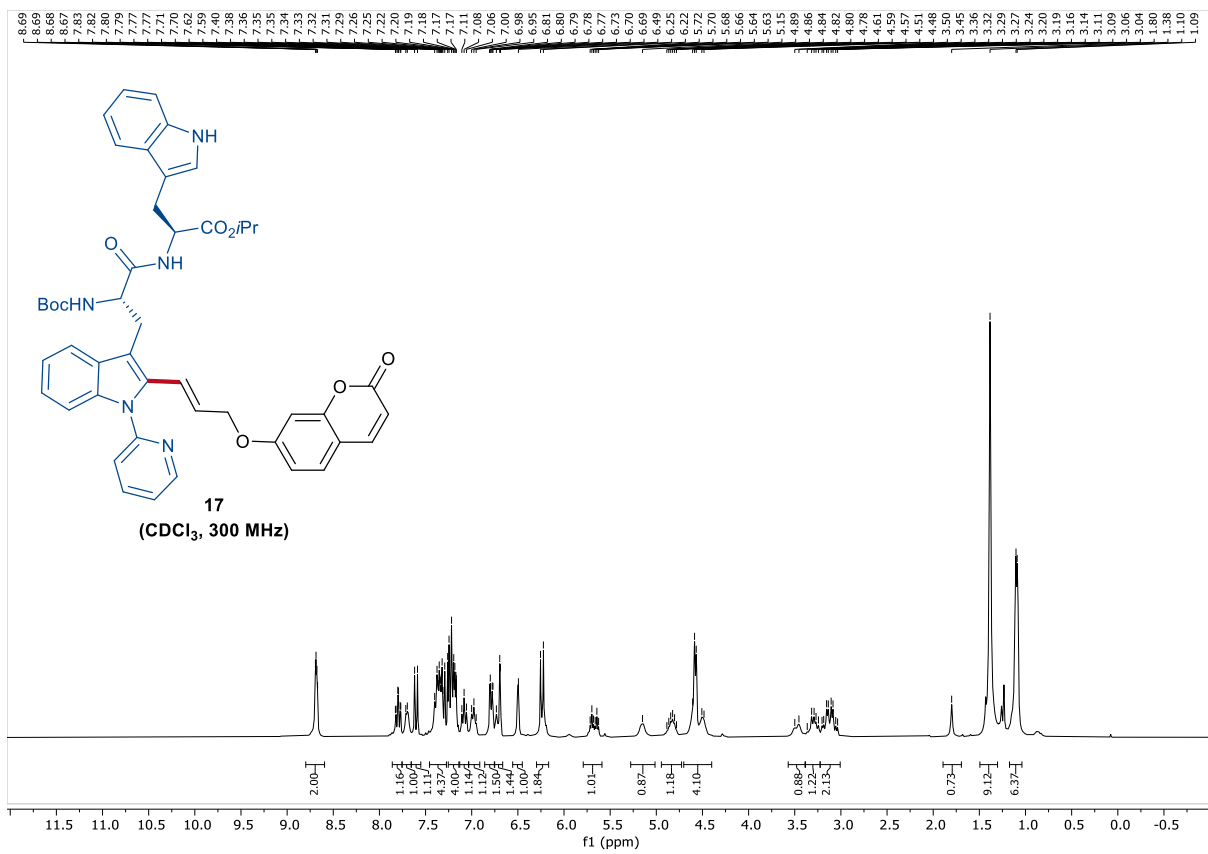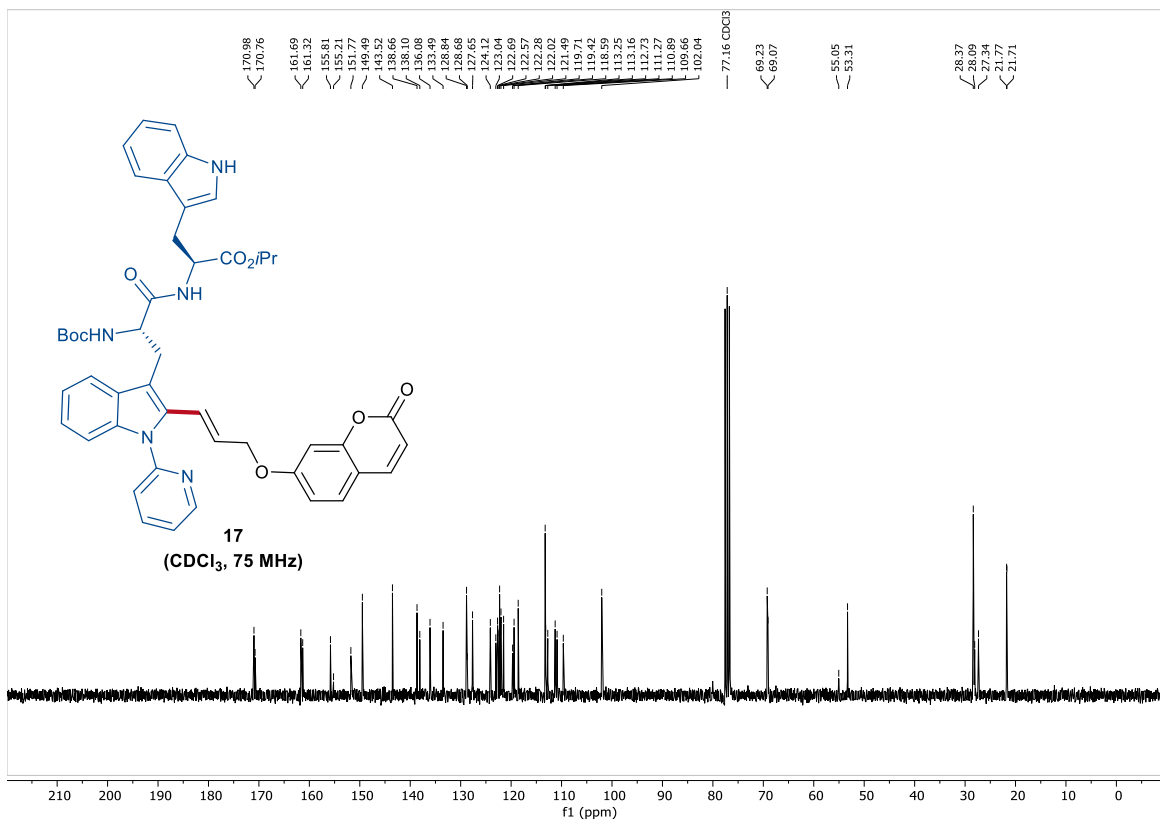

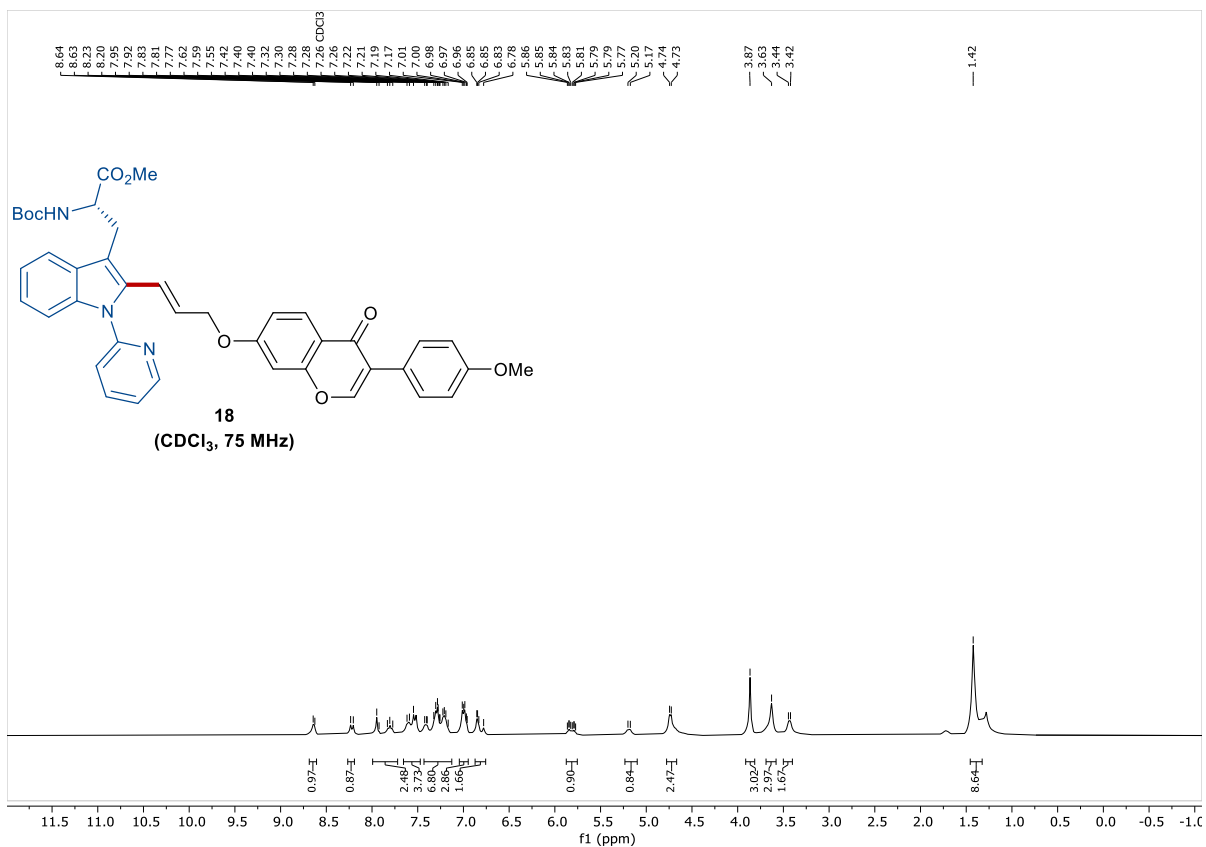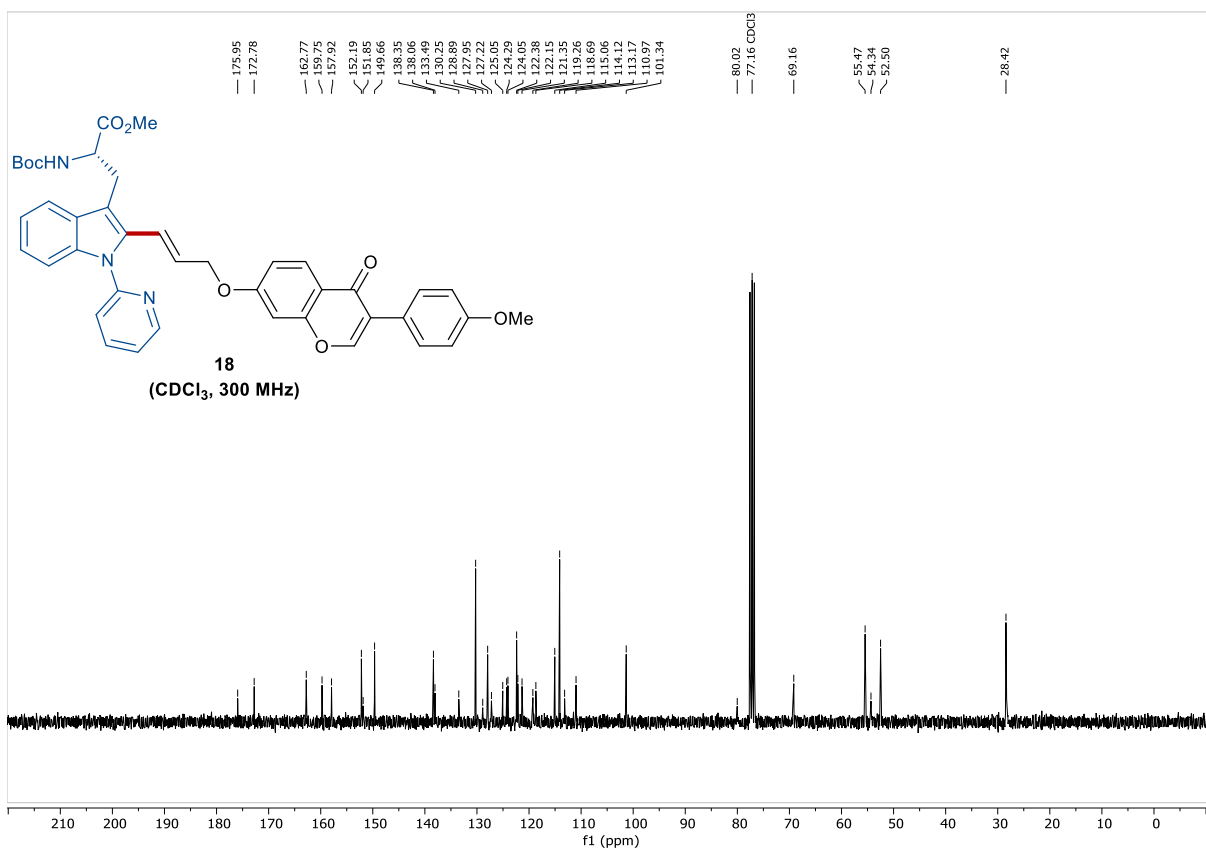



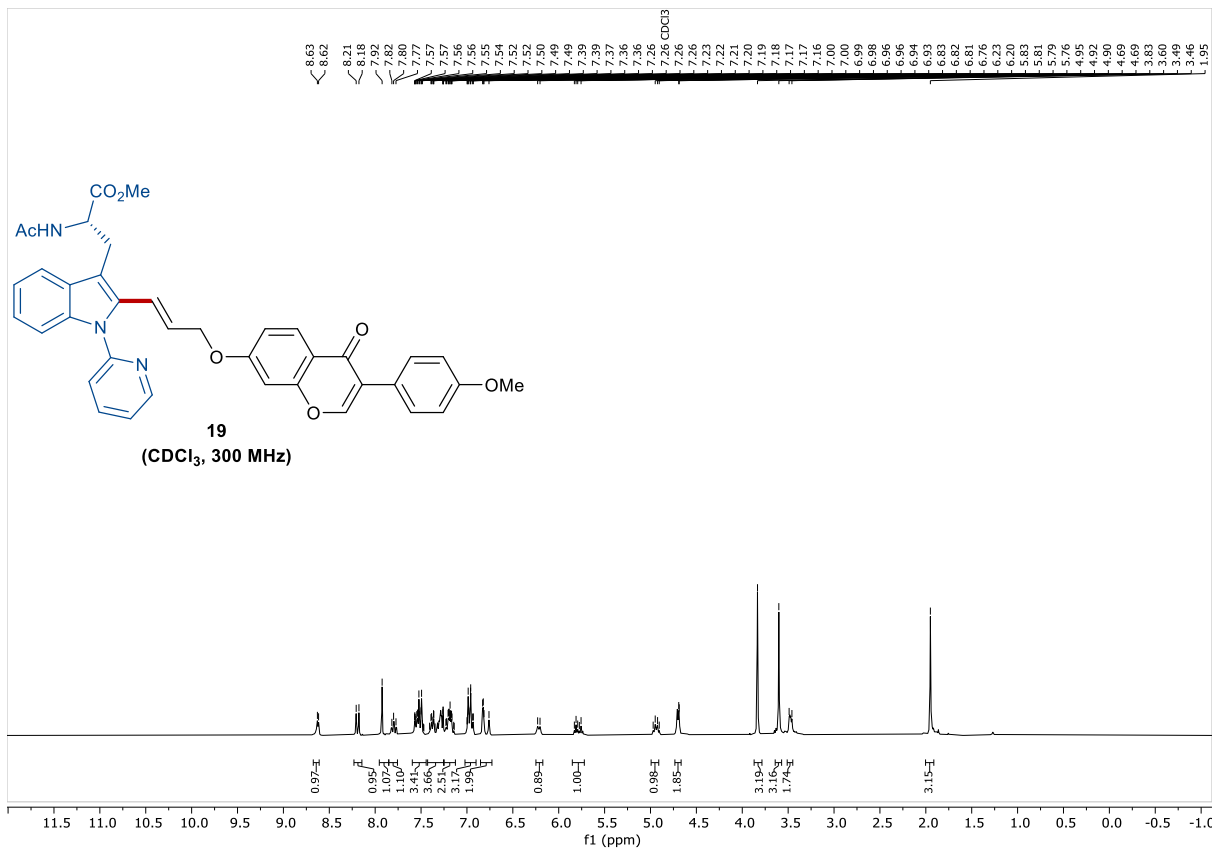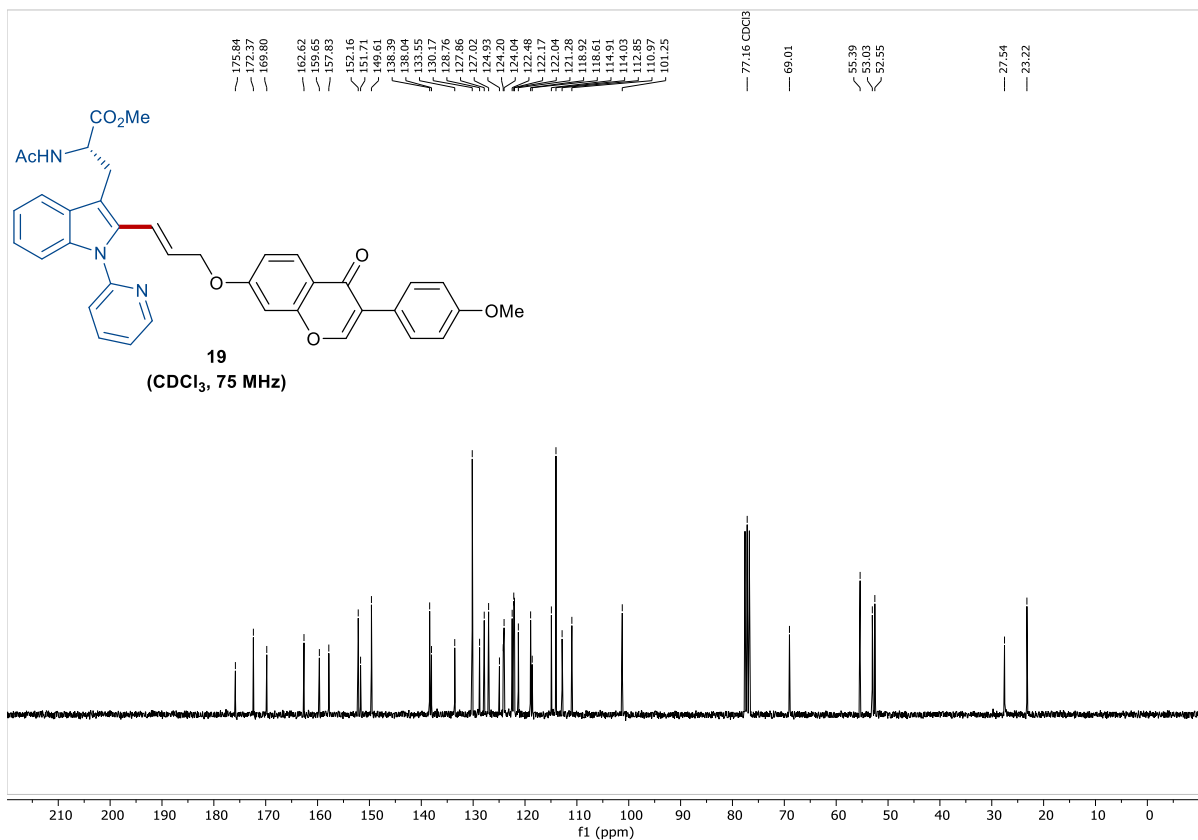

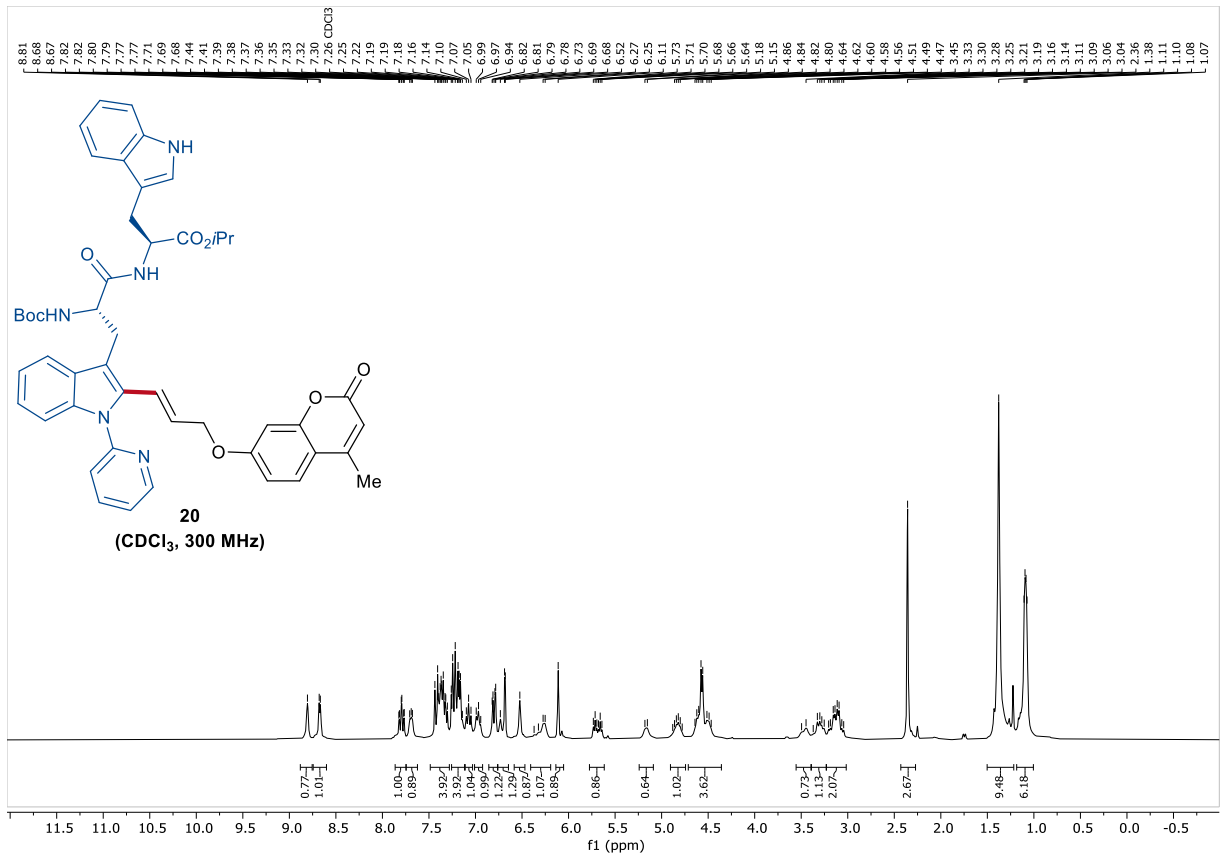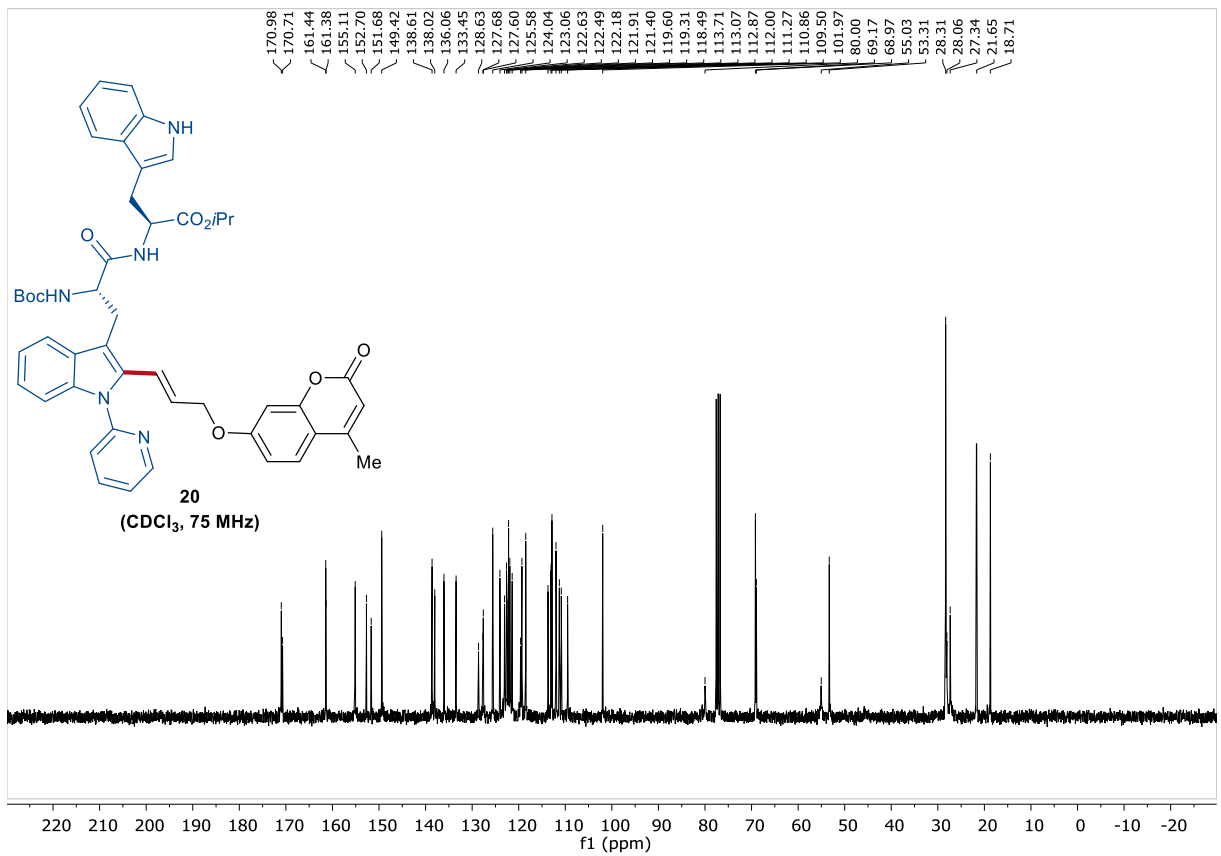

## References

- [1] M. Chtchigrovsky, A. Primo, P. Gonzalez, K. Molvinger, M. Robitzer, F. Quignard and F. Taran, *Angew. Chem. Int. Ed.*, 2009, **48**, 5916–5920.
- [2] W. Xu, Y. Chen, A. Wang and Y. Liu, *Org.Lett.*, 2019, **21**, 7613–7618.
- [3] K. B. Pal, M. Mahanti, X. Huang, S. Persson, A. P. Sundin, F. R. Zetterberg, S. Oredsson, H. Lefflerd and U. J. Nilsson, *Org. Biomol. Chem.*, 2018, **16**, 6295–6305.
- [4] V. Daniel, Y. J. Rao, K. S. Kumar and G. L. D. Krupadanam. *Heterocycl. Comm.*, 2008, **14**, 337–344.
- [5] M. J. Frisch, G. W. Trucks, H. B. Schlegel, G. E. Scuseria, M. A. Robb, J. R. Cheeseman, G. Scalmani, V. Barone, G. A. Petersson, H. Nakatsuji, X. Li, M. Caricato, A. V. Marenich, J. Bloino, B. G. Janesko, R. Gomperts, B. Mennucci, H. P. Hratchian, J. V. Ortiz, A. F. Izmaylov, J. L. Sonnenberg, Williams, F. Ding, F. Lipparini, F. Egidi, J. Goings, B. Peng, A. Petrone, T. Henderson, D. Ranasinghe, V. G. Zakrzewski, J. Gao, N. Rega, G. Zheng, W. Liang, M. Hada, M. Ehara, K. Toyota, R. Fukuda, J. Hasegawa, M. Ishida, T. Nakajima, Y. Honda, O. Kitao, H. Nakai, T. Vreven, K. Throssell, J. A. Montgomery Jr, J. E. Peralta, F. Ogliaro, M. J. Bearpark, J. J. Heyd, E. N. Brothers, K. N. Kudin, V. N. Staroverov, T. A. Keith, R. Kobayashi, J. Normand, K. Raghavachari, A. P. Rendell, J. C. Burant, S. S. Iyengar, J. Tomasi, M. Cossi, J. M. Millam, M. Klene, C. Adamo, R. Cammi, J. W. Ochterski, R. L. Martin, K. Morokuma, O. Farkas, J. B. Foresman and D. J. Fox, Gaussian16 Rev.A.03: Wallingford, CT, 2016.
- [6] J. Tao, J. P. Perdew, V. N. Staroverov and G. E. Scuseria, *Phys. Rev. Lett.*, 2003, **91**, 146401.
- [7] S. Grimme, S. Ehrlich and L. Goerigk, *J. Comput. Chem.*, 2011, **32**, 1456; b) S. Grimme, J. Antony, S. Ehrlich and H. Krieg, *J. Chem. Phys.*, 2010, **132**, 154104.
- [8] a) F. Weigend, *Phys. Chem. Chem. Phys.*, 2006, **8**, 1057; b) F. Weigend and R. Ahlrichs, *Phys. Chem. Chem. Phys.*, 2005, **7**, 3297.
- [9] Y. Zhao, D. G. Truhlar, *J. Phys. Chem. A*, 2005, **109**, 5656.
- [10] a) E. Caldeweyher, S. Ehlert, A. Hansen, H. Neugebauer, S. Spicher, C. Bannwarth and S. Grimme, *J. Chem. Phys.*, 2019, **150**, 154122; b) E. Caldeweyher, C. Bannwarth and S. Grimme, *J. Chem. Phys.*, 2017, **147**, 034112; c) <https://www.chemie.uni-bonn.de/pctc/mulliken-center/software/dftd4>.
- [11] A. V. Marenich, C. J. Cramer and D. G. Truhlar, *J. Phys. Chem. B*, 2009, **113**, 6378.
- [12] A. Schischko, N. Kaplaneris, T. Rogge, G. Sirvinskaite, J. Son and L. Ackermann, *Nat. Commun.*, 2019, **10**, 3553.
- [13] E. Haak, H. Hopf and U. Jahn, *Comprehensive Organic Functional Group Transformations II*, eds. A. R. Katritzky and R. J. K. Taylor, Elsevier, Amsterdam, 2005, Pages 6400.
